# Supplementary material for: Solvent-dependent excited state intramolecular proton transfer (ESIPT) pathways from phenol to carbon in 2,5-dihydroxyphenyl arenes
Source: Royal Society of Chemistry journal article supplement (doi:10.1039/c3pp50091h), 2013-04-16
Supplement: c3pp50091h.pdf [file c3pp50091h.pdf]

Supporting Information for

**Solvent-Directed Excited State Intramolecular Proton Transfer  
(ESIPT) Pathways from Phenol to Carbon in 2,5-dihydroxyphenyl  
Arenes**

Yu-Hsuan Wang and Peter Wan\*

*Department of Chemistry, Box 3065, University of Victoria,*

*British Columbia, Canada, V8W 3V6*

*Fax: +1 (250) 721-7147; Tel: +1(250) 721-8976; E-mail: [pwan@uvic.ca](mailto:pwan@uvic.ca)*

**Table of contents:**

|                                                                                                          |            |
|----------------------------------------------------------------------------------------------------------|------------|
| <b>1. NMR spectra (<math>^1\text{H}</math>, <math>^{13}\text{C}</math> and 2D analyses) of compounds</b> | <b>S3</b>  |
| <b>2. Irradiations of 9 – 11 in UV-Vis cuvettes</b>                                                      | <b>S53</b> |
| <b>3. Fluorescence spectra of 9 – 11 and 15 in various solvents</b>                                      | <b>S58</b> |
| <b>4. Photophysical and photochemical parameters for 9–11 in various solvents</b>                        | <b>S65</b> |
| <b>5. Fluorescence decay profiles of 9 – 11 in <math>\text{CH}_3\text{CN}</math></b>                     | <b>S67</b> |
| <b>6. Laser flash photolysis of 9 – 11, 13 and 15 in various solvents</b>                                | <b>S69</b> |
| <b>7. Computational data of 10</b>                                                                       | <b>S73</b> |

## 1. NMR spectra ( $^1\text{H}$ , $^{13}\text{C}$ and 2D analyses) of compounds

$^1\text{H}$  NMR (500 MHz,  $\text{CDCl}_3$ ) spectrum of **9**

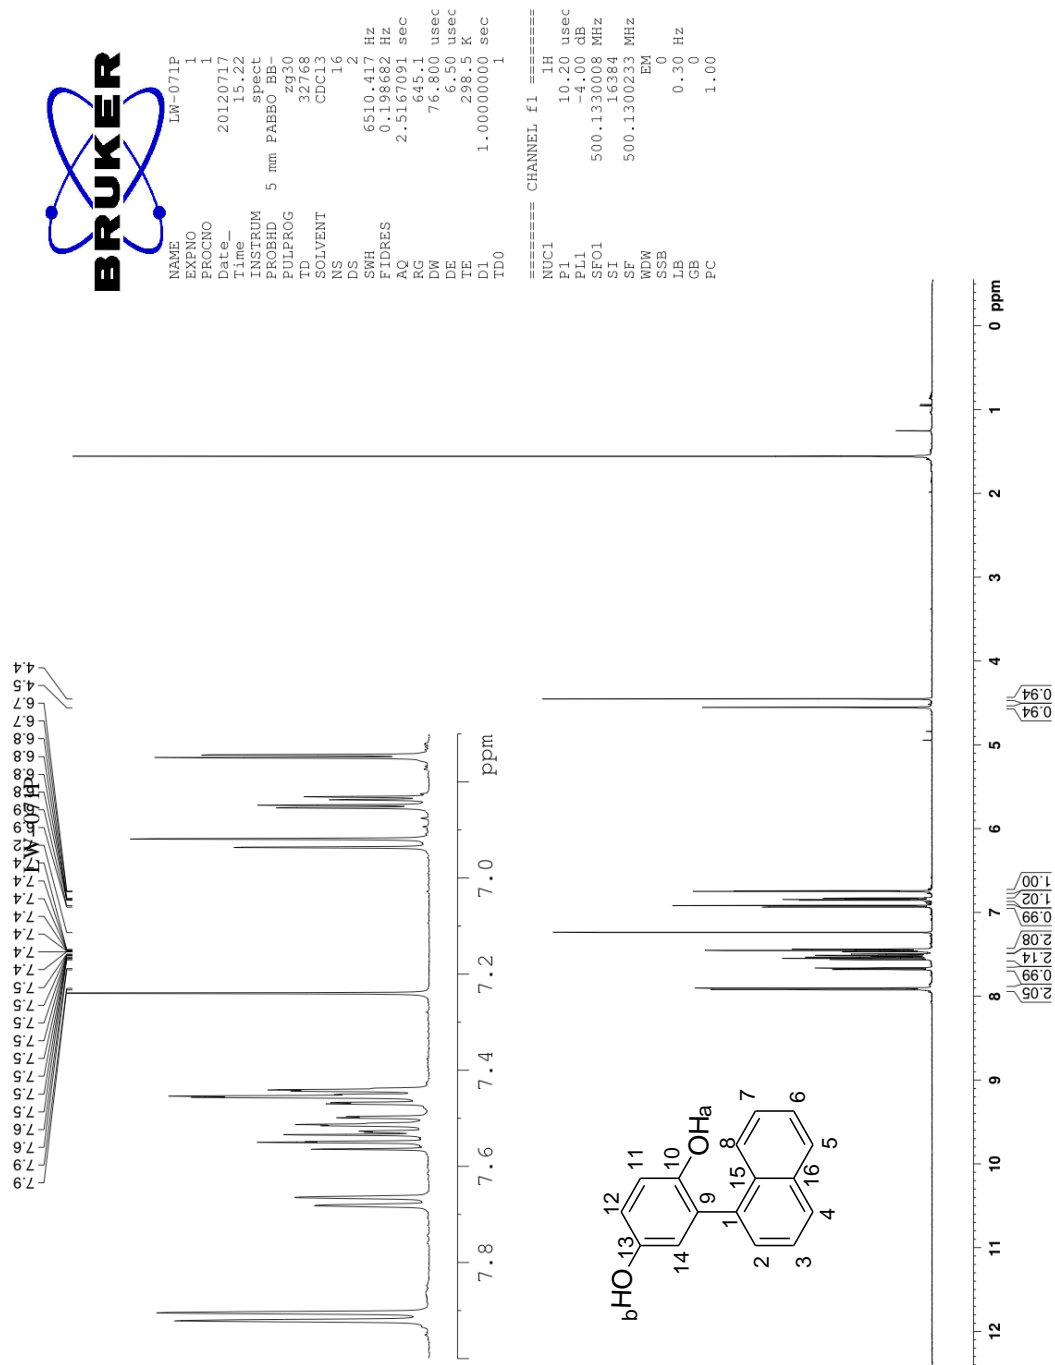

$^{13}\text{C}$  NMR (125 MHz,  $\text{CDCl}_3$ ) spectrum of **9**

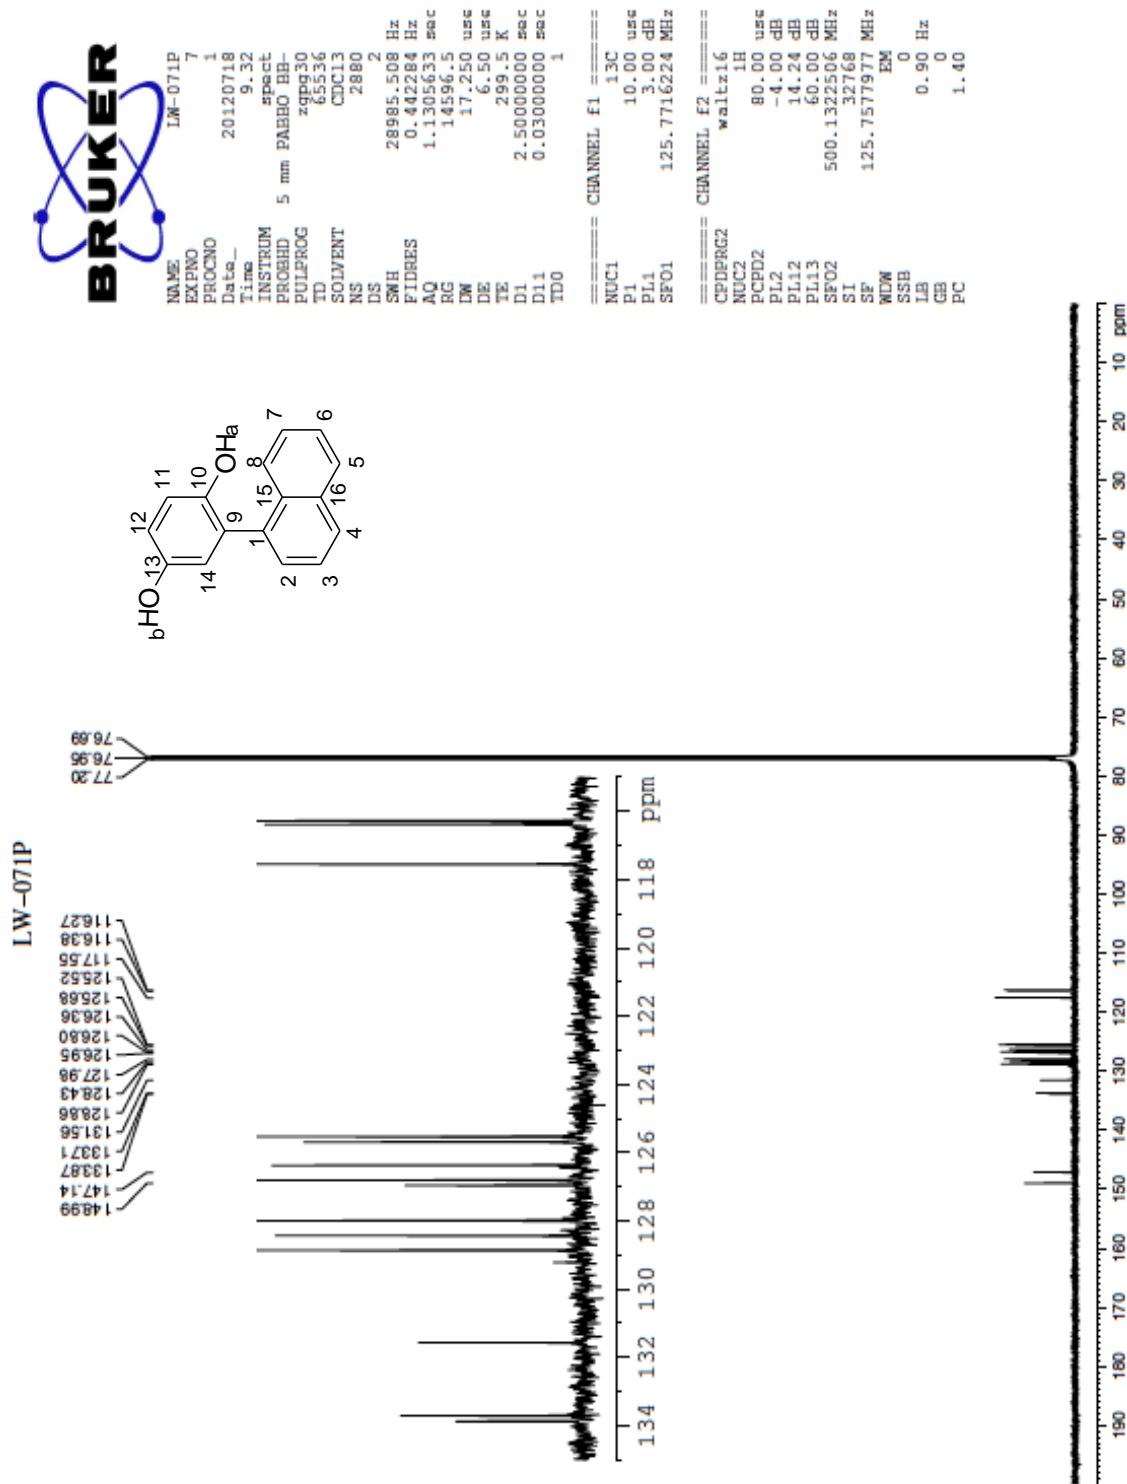

<sup>1</sup>H NMR (500 MHz, CDCl<sub>3</sub>) spectrum of **10**

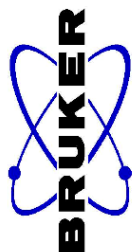

NAME LW065P  
EXPNO 1  
PROCNO 1  
Date\_ 20120711  
Time\_ 10.58  
INSTRUM spect  
PROBHD 5 mm PABBO BB-  
PULPROG zg30  
TD 32768  
SOLVENT CDCl3  
NS 16  
DS 2  
SWH 6510.417 Hz  
FIDRES 0.1198682 Hz  
AQ 2.5167091 sec  
RG 322.5  
DW 76.800 usec  
DE 6.50 usec  
TE 298.0 K  
D1 1.00000000 sec  
TD0 1

===== CHANNEL f1 =====  
NUC1 1H  
P1 10.20 usec  
PL1 -4.00 dB  
SFO1 500.1330008 MHz  
SI 16384  
SF 500.13300233 MHz  
WDW EM  
SSB 0  
LB 0.30 Hz  
GB 0  
PC 1.00

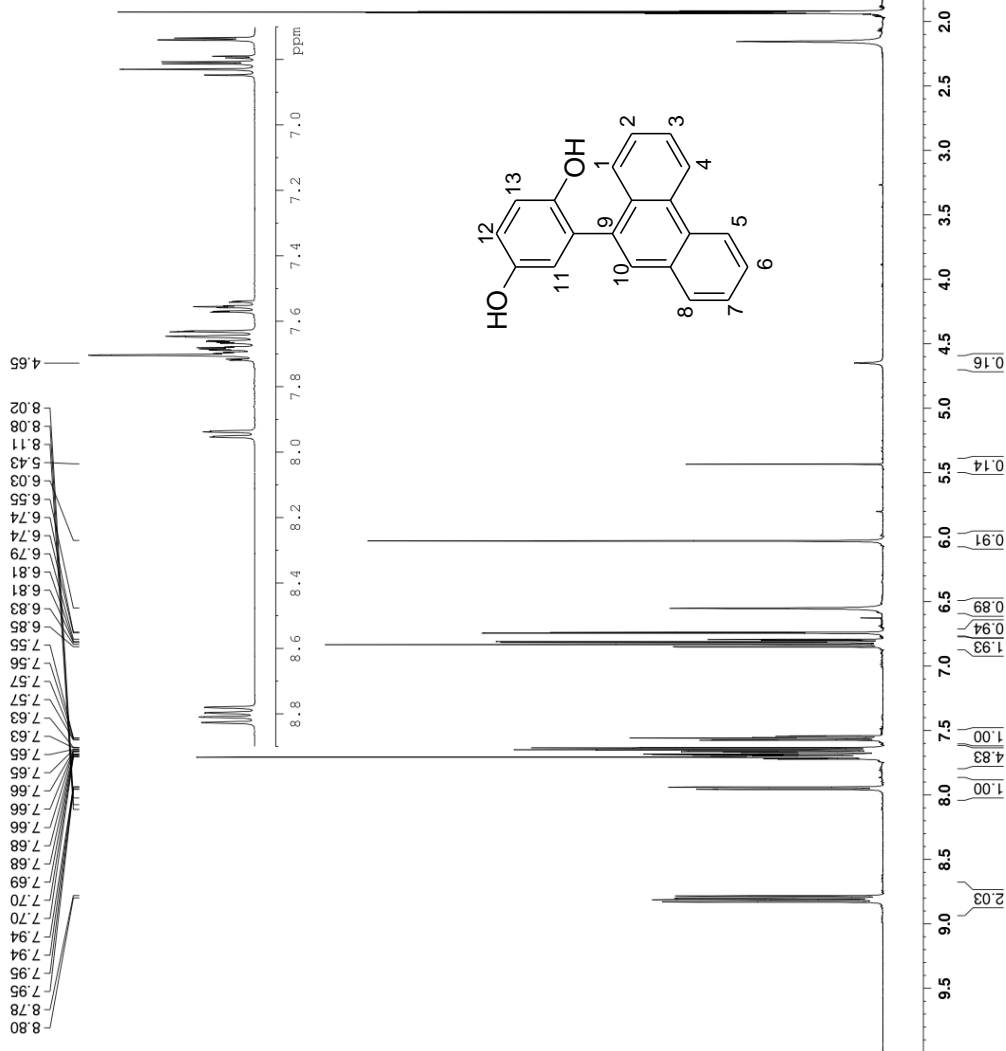

$^{13}\text{C}$  NMR (500 MHz,  $\text{CDCl}_3$ ) spectrum of **10**

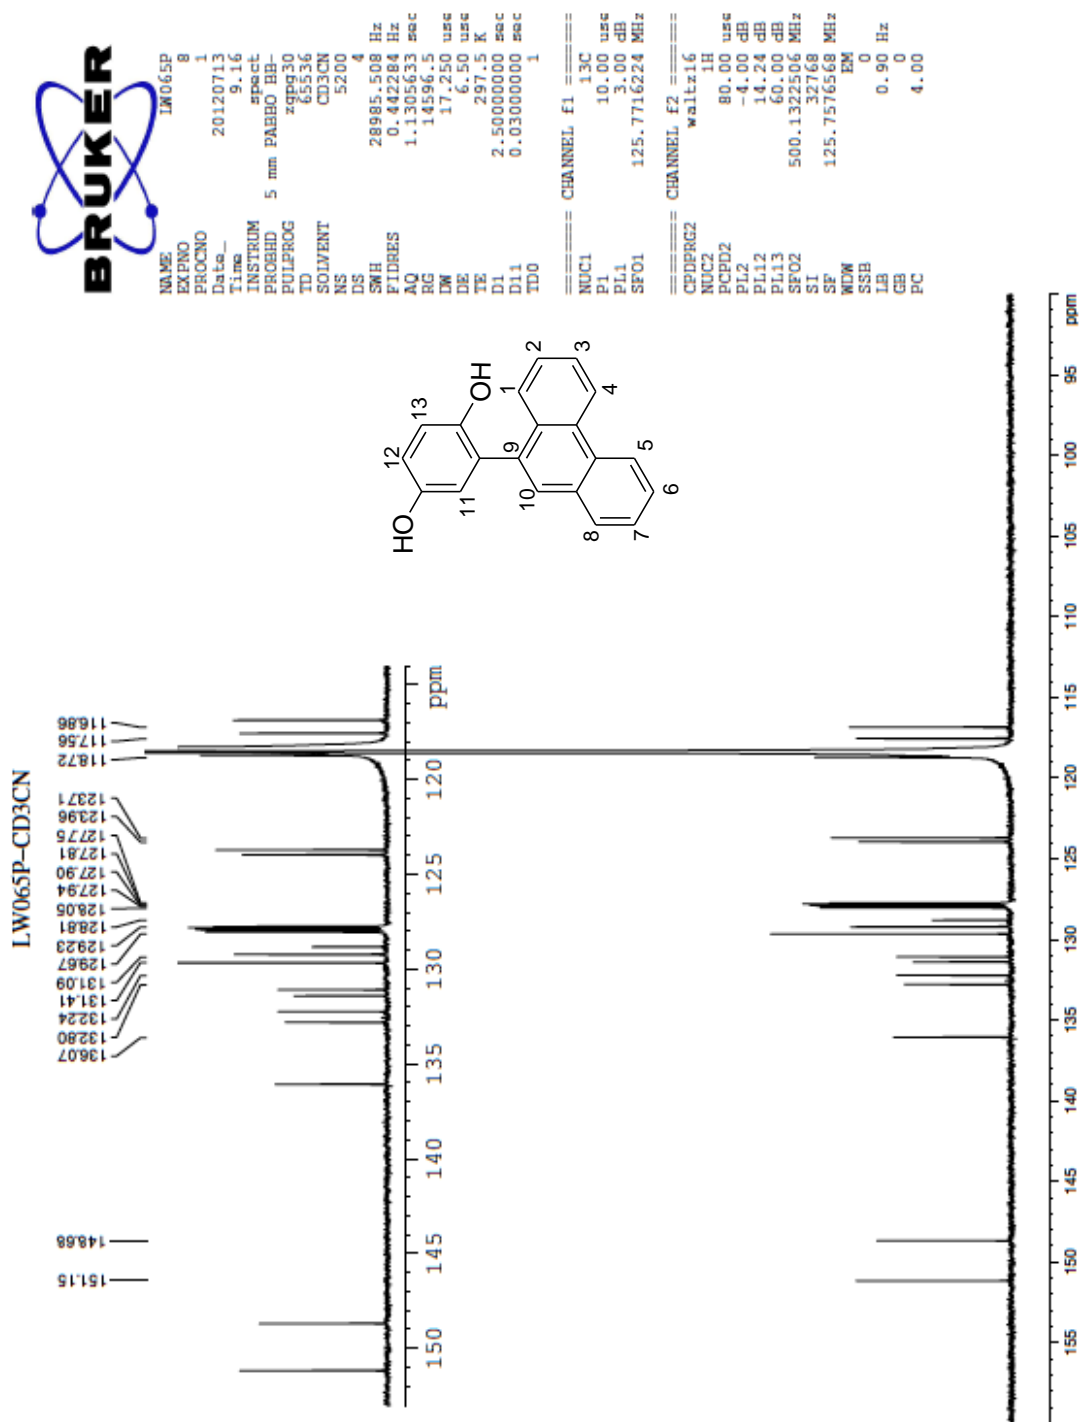

gCOSY spectrum of **10** in CDCl<sub>3</sub>

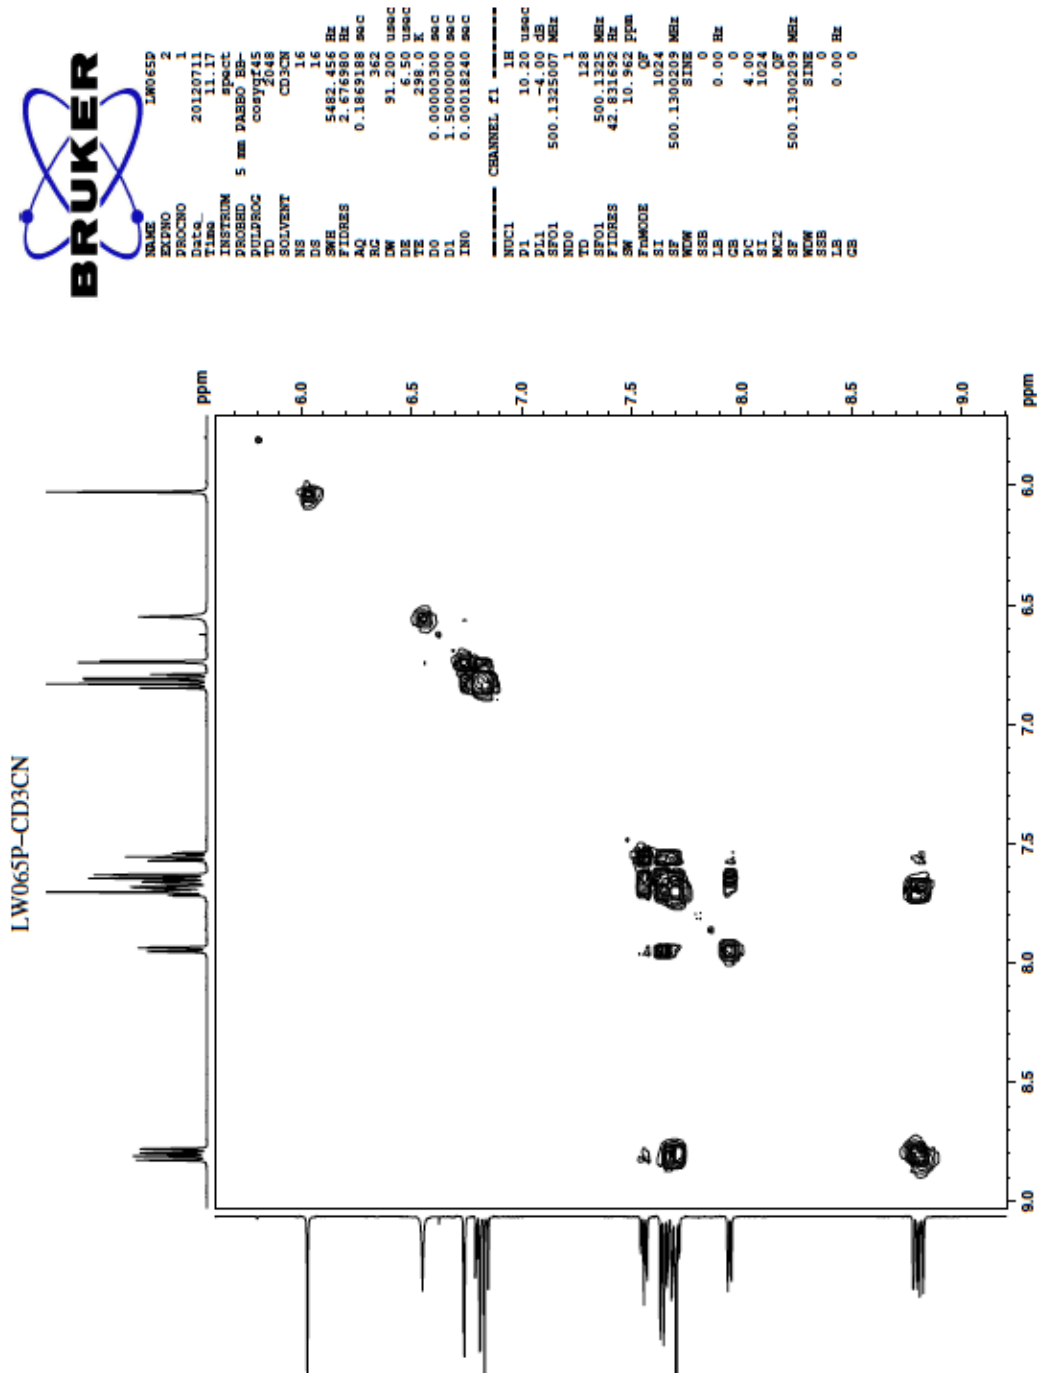





gHSQC spectrum of **10** in CDCl<sub>3</sub>

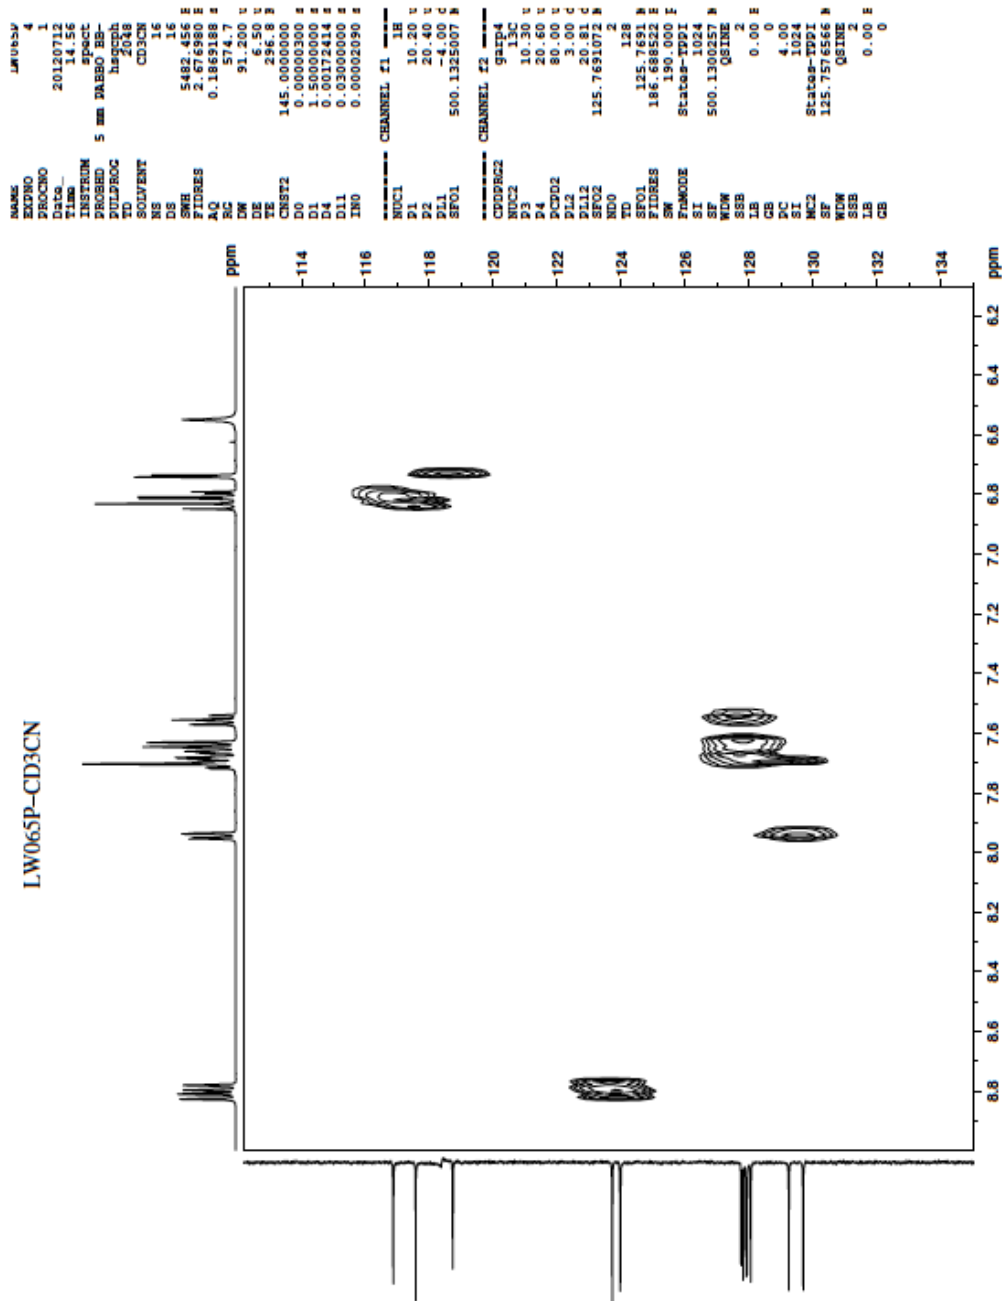

$^1\text{H}$  NMR (500 MHz,  $\text{CDCl}_3$ ) spectrum of **11**

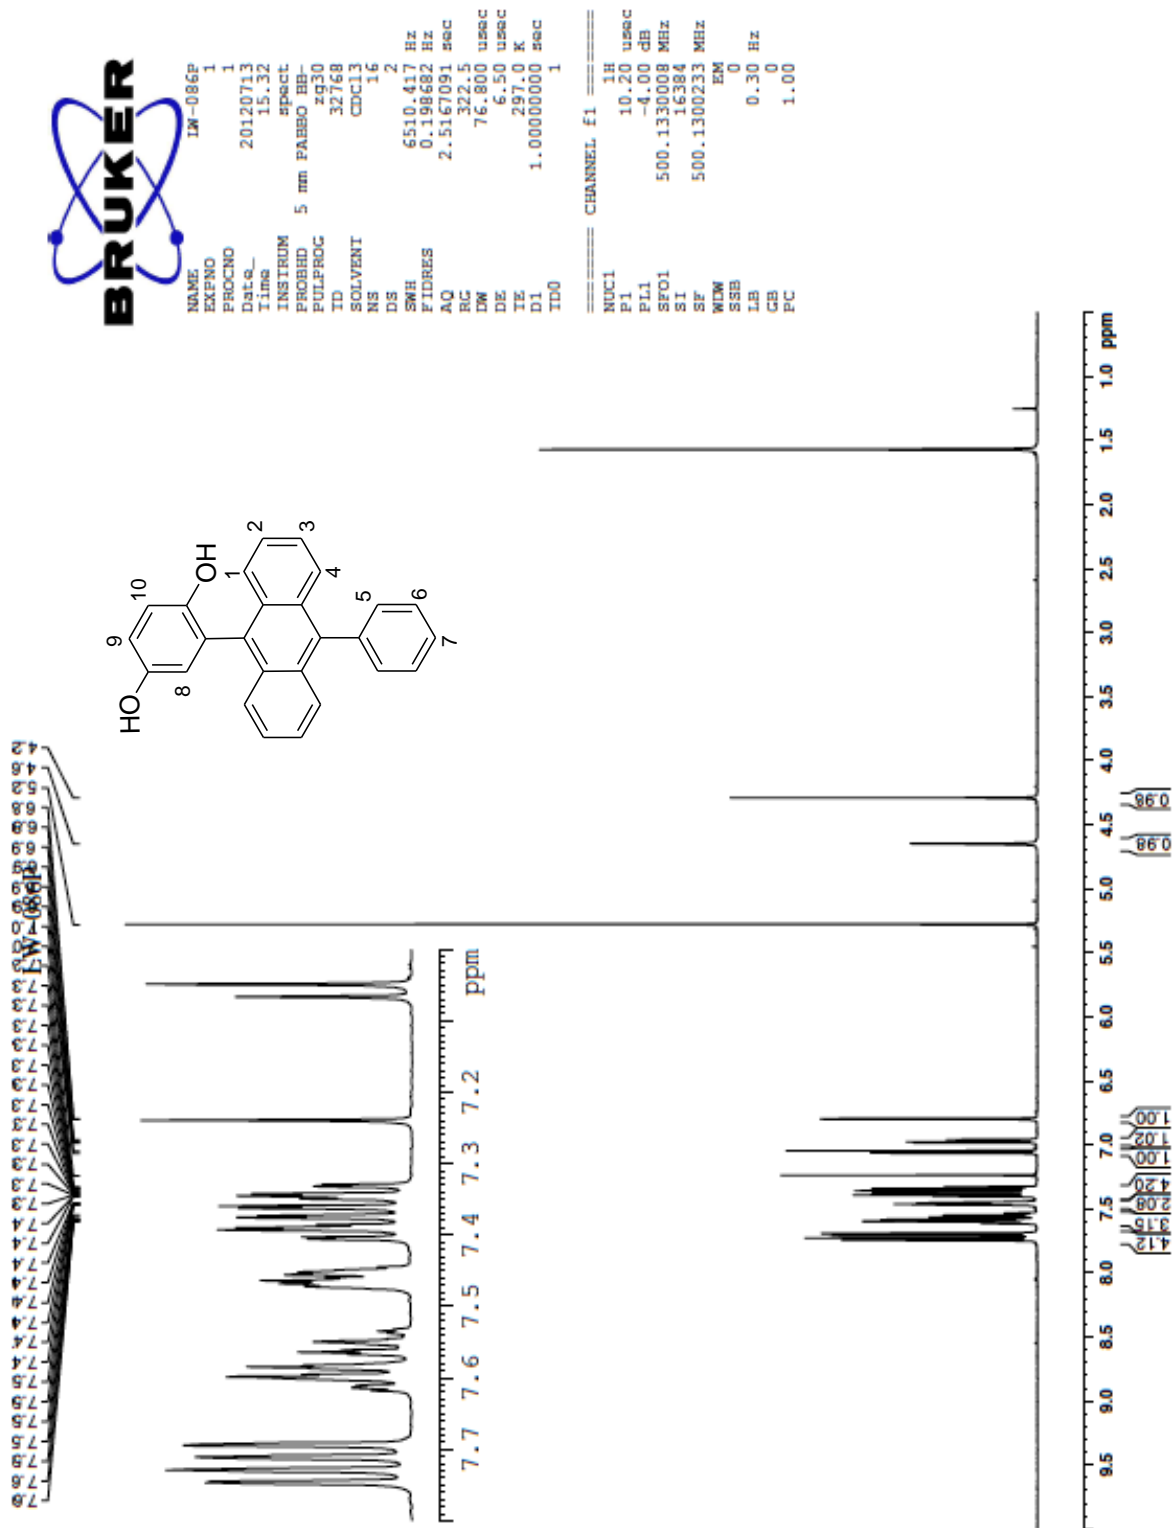

$^{13}\text{C}$  NMR (125 MHz,  $\text{CDCl}_3$ ) spectrum of **11**

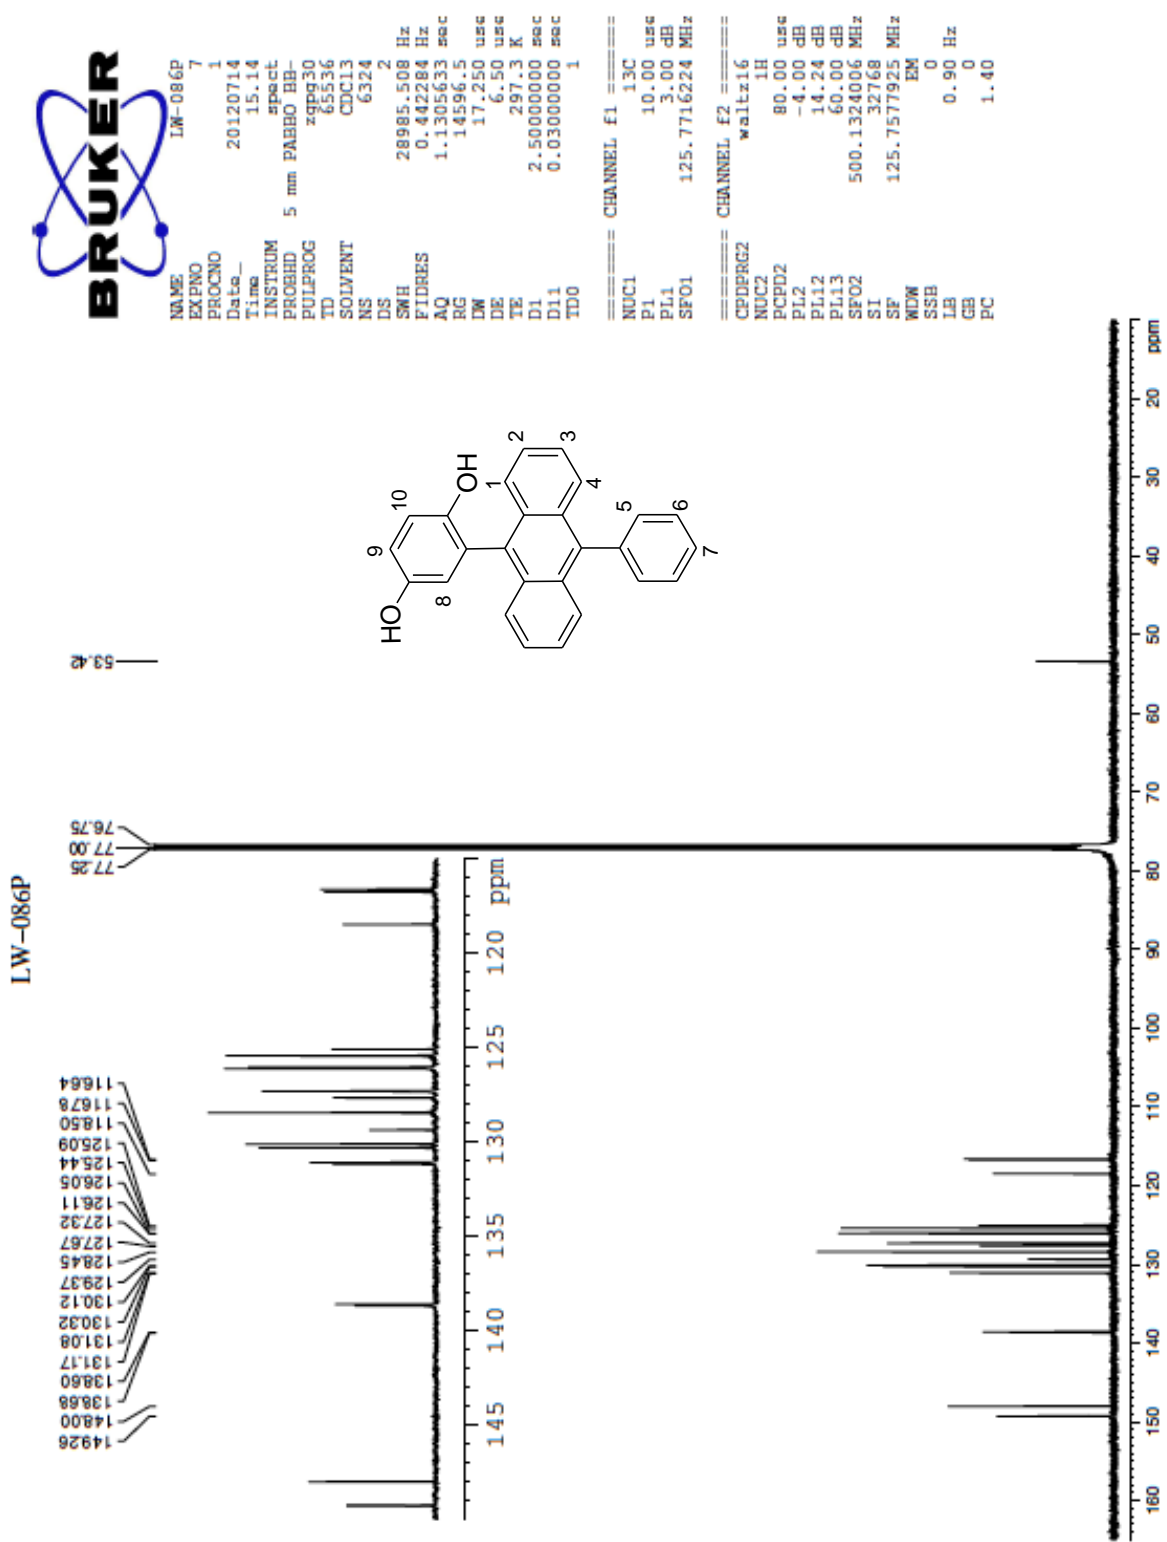

gCOSY spectrum of **11** in CDCl<sub>3</sub>

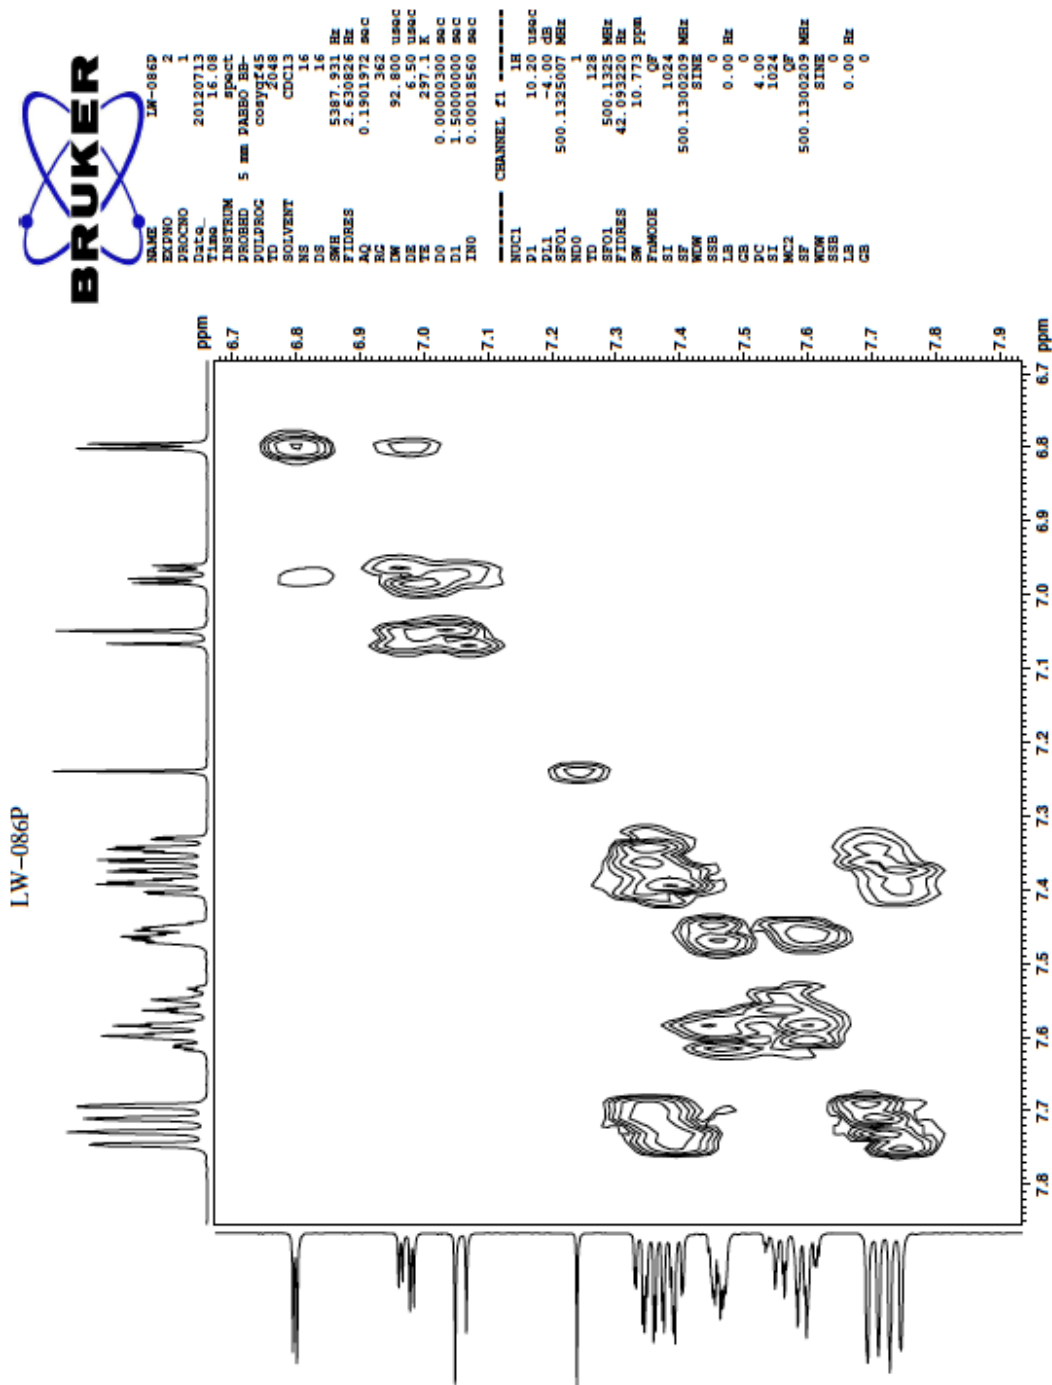



gHSQC spectrum of **11** in CDCl<sub>3</sub>

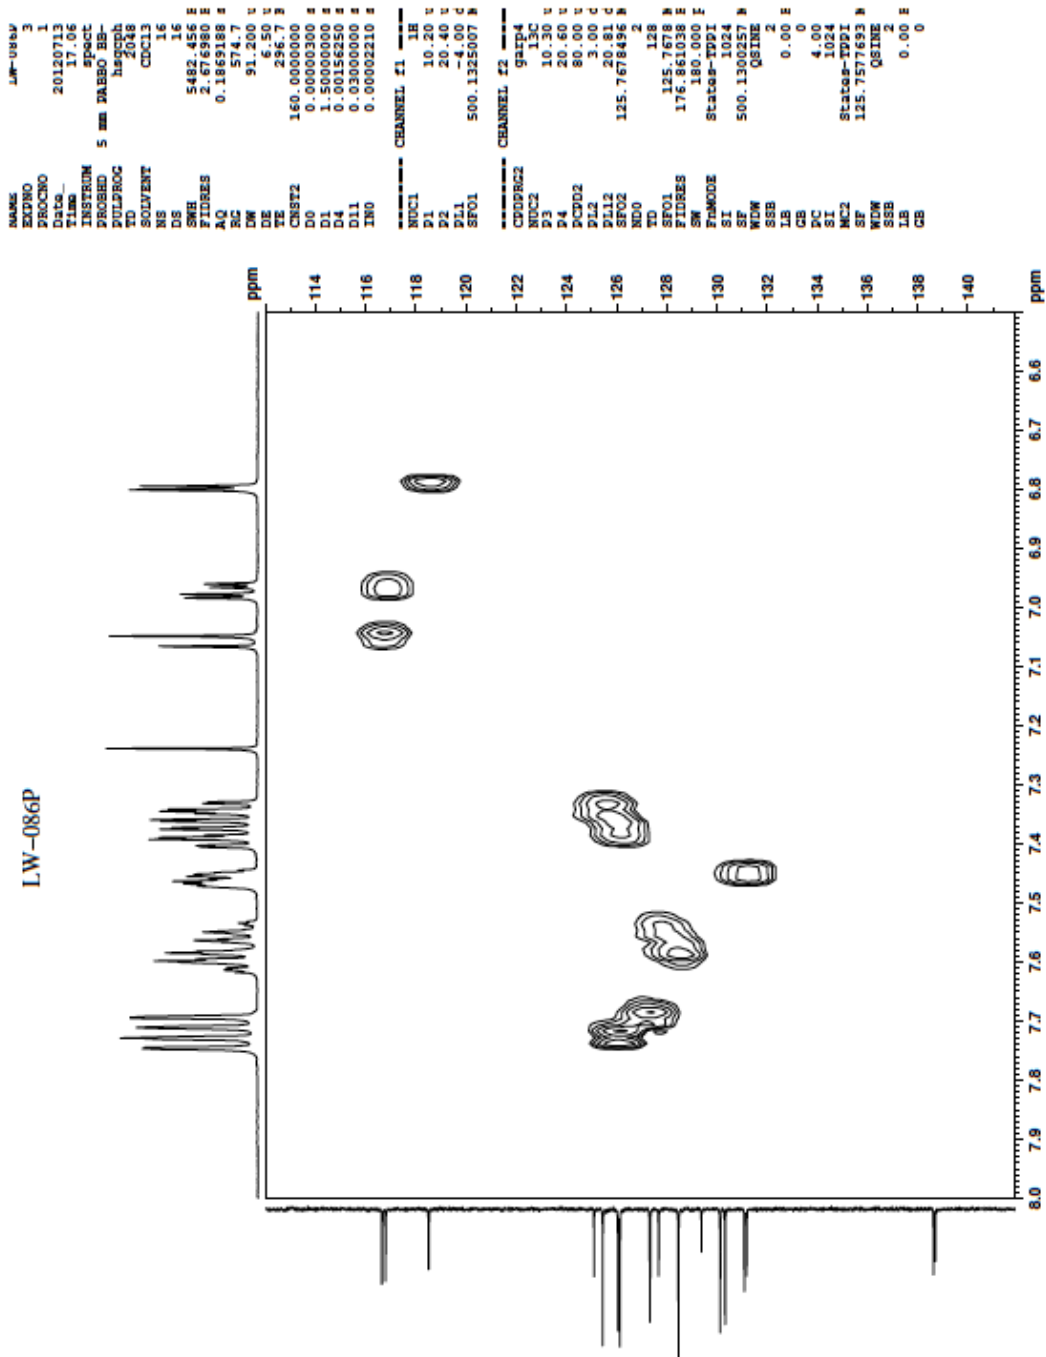

$^1\text{H}$  NMR (500 MHz,  $\text{CDCl}_3$ ) spectrum of **12**

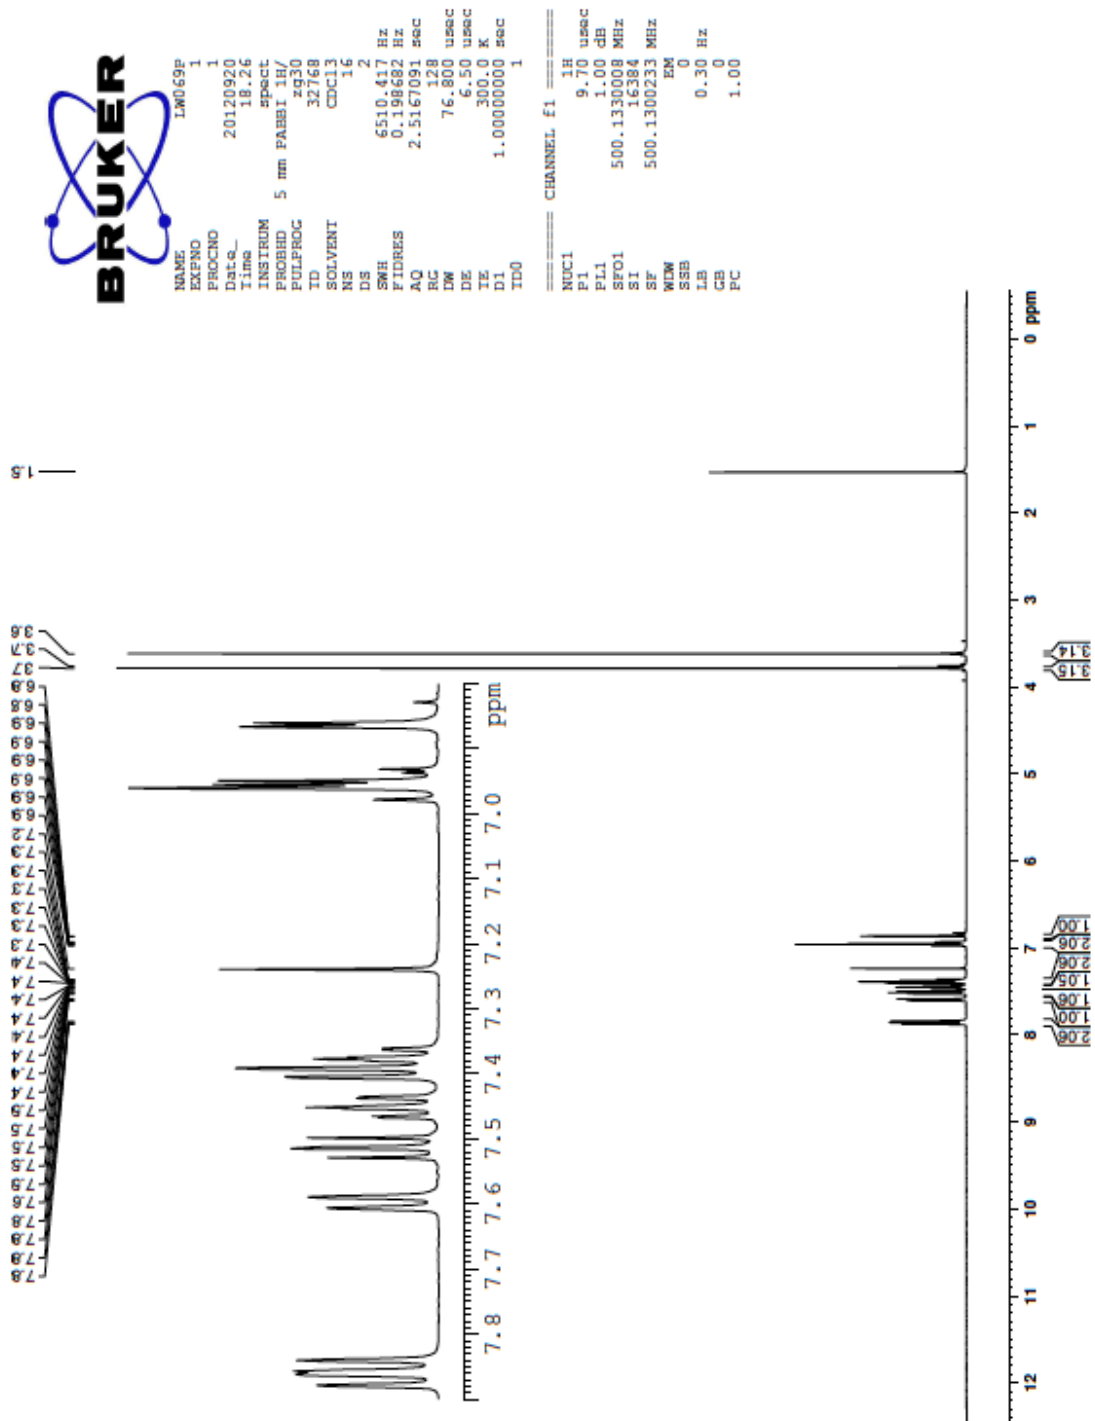

$^{13}\text{C}$  NMR (125 MHz,  $\text{CDCl}_3$ ) spectrum of **12**

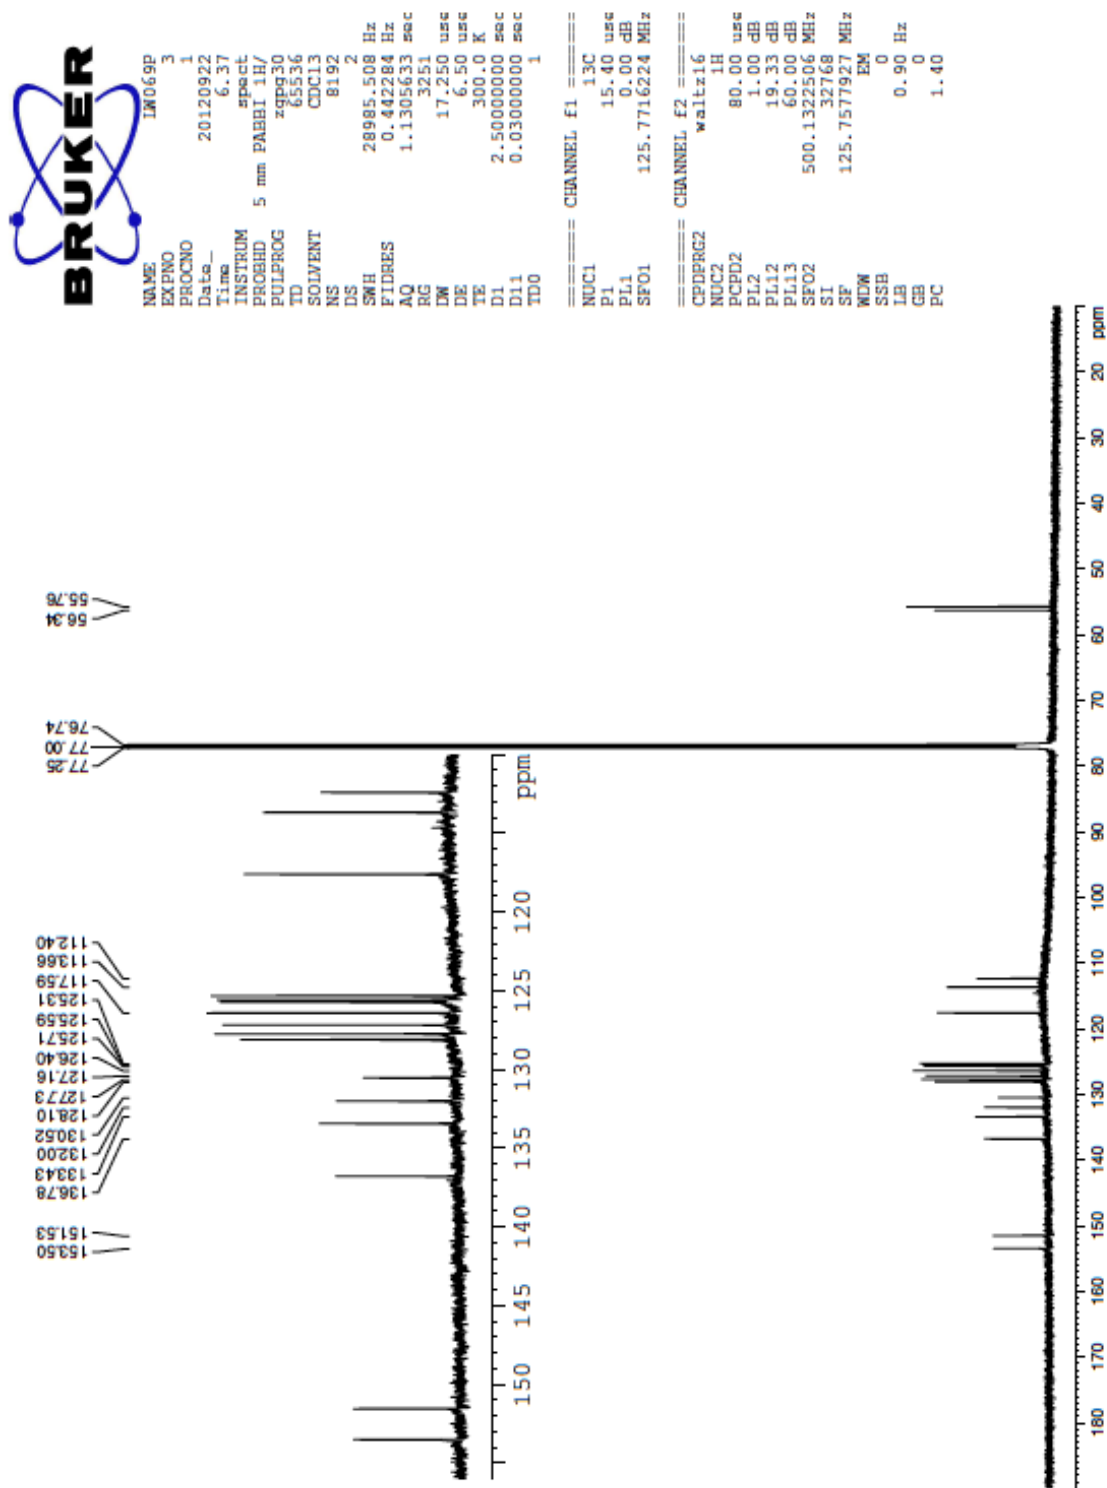





$^{13}\text{C}$  NMR (75 MHz,  $\text{CDCl}_3$ ) spectrum of **13**

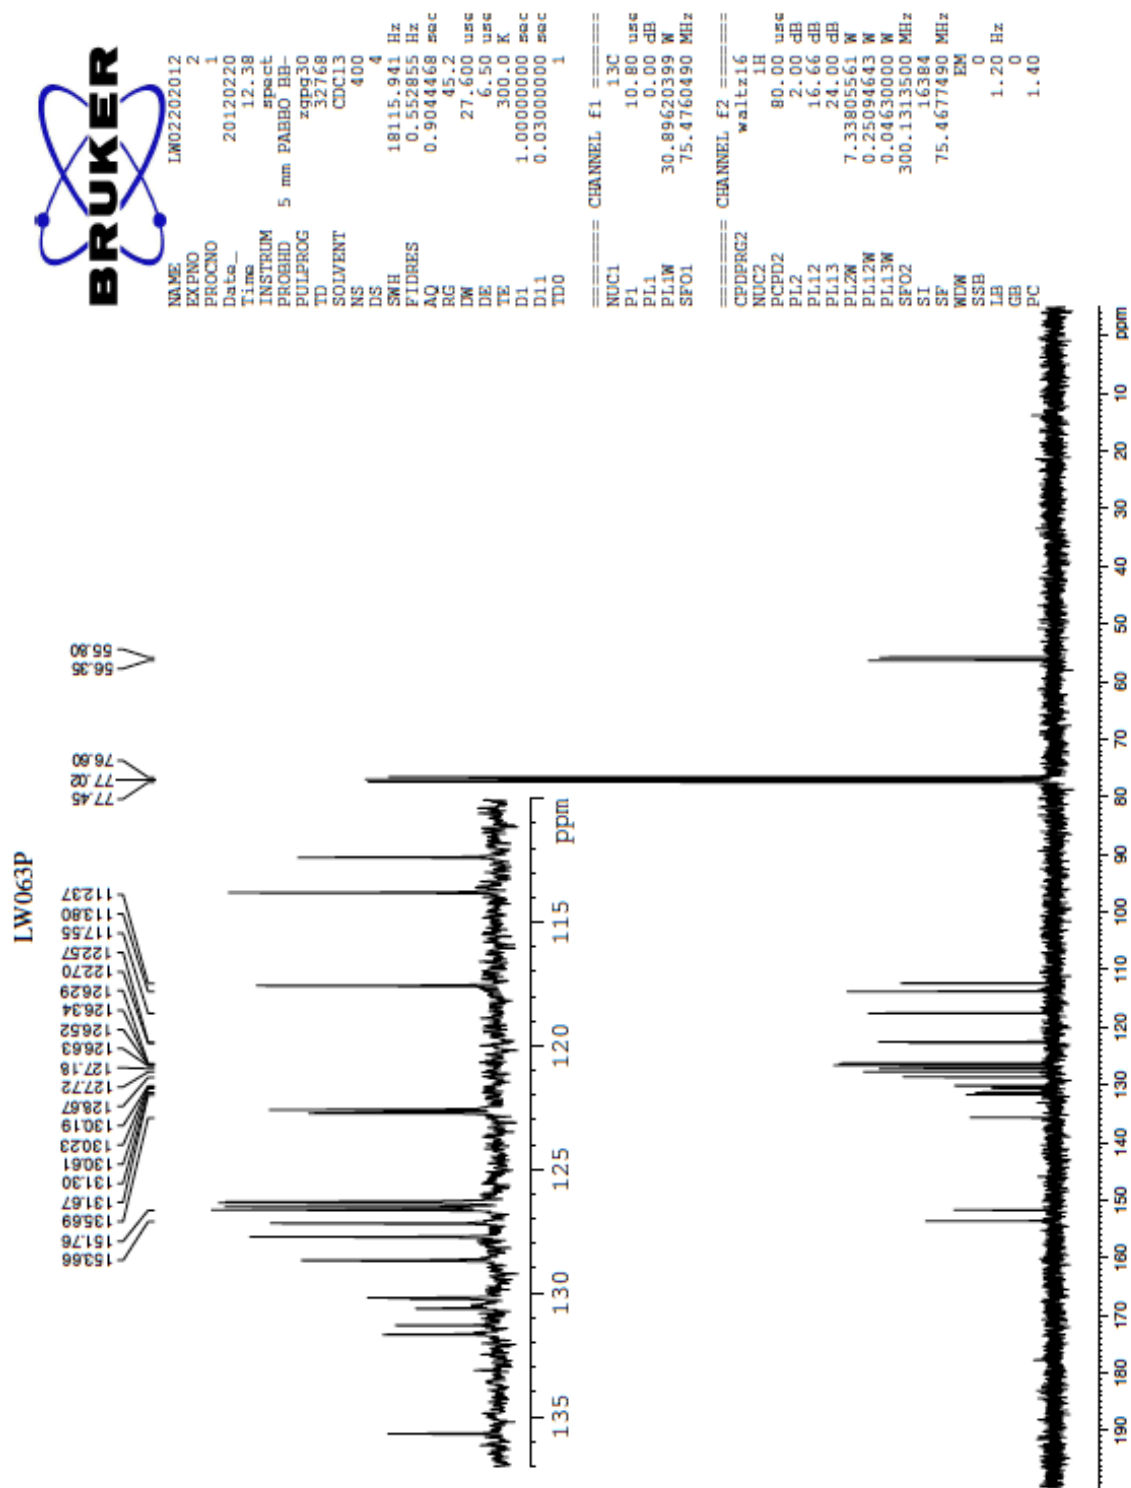



$^{13}\text{C}$  NMR (125 MHz,  $\text{CDCl}_3$ ) spectrum of **14**

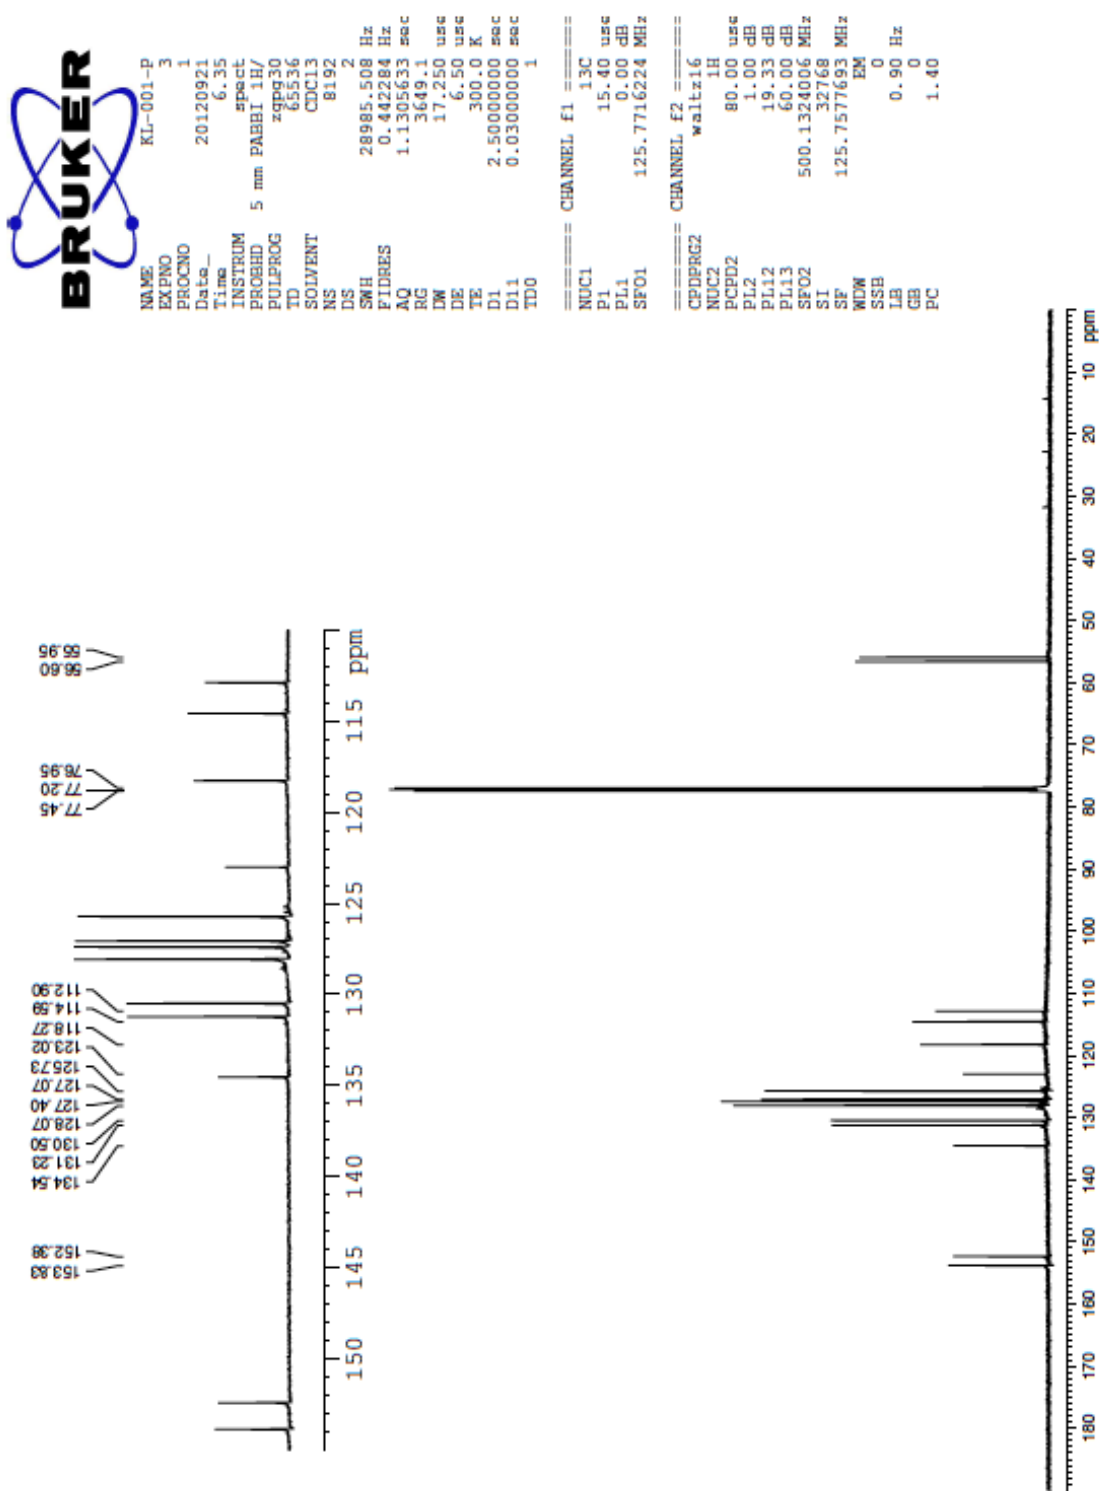

$^1\text{H}$  NMR (300 MHz,  $\text{CDCl}_3$ ) spectrum of **15**

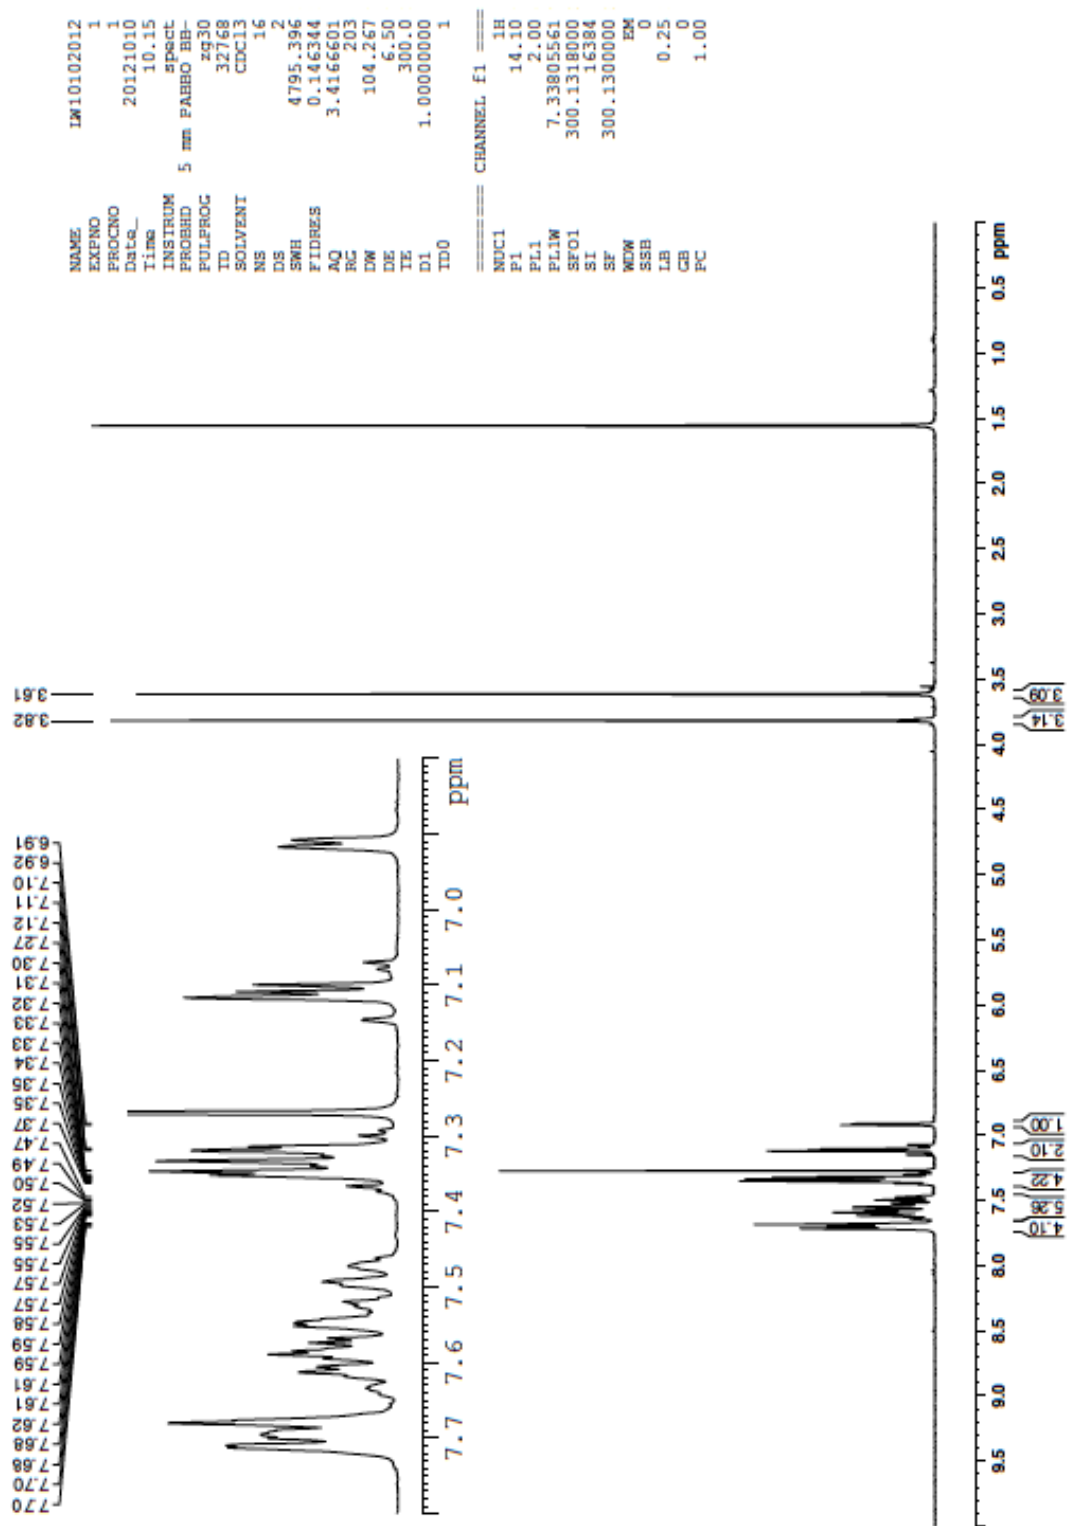

$^{13}\text{C}$  NMR (75 MHz,  $\text{CDCl}_3$ ) spectrum of **15**

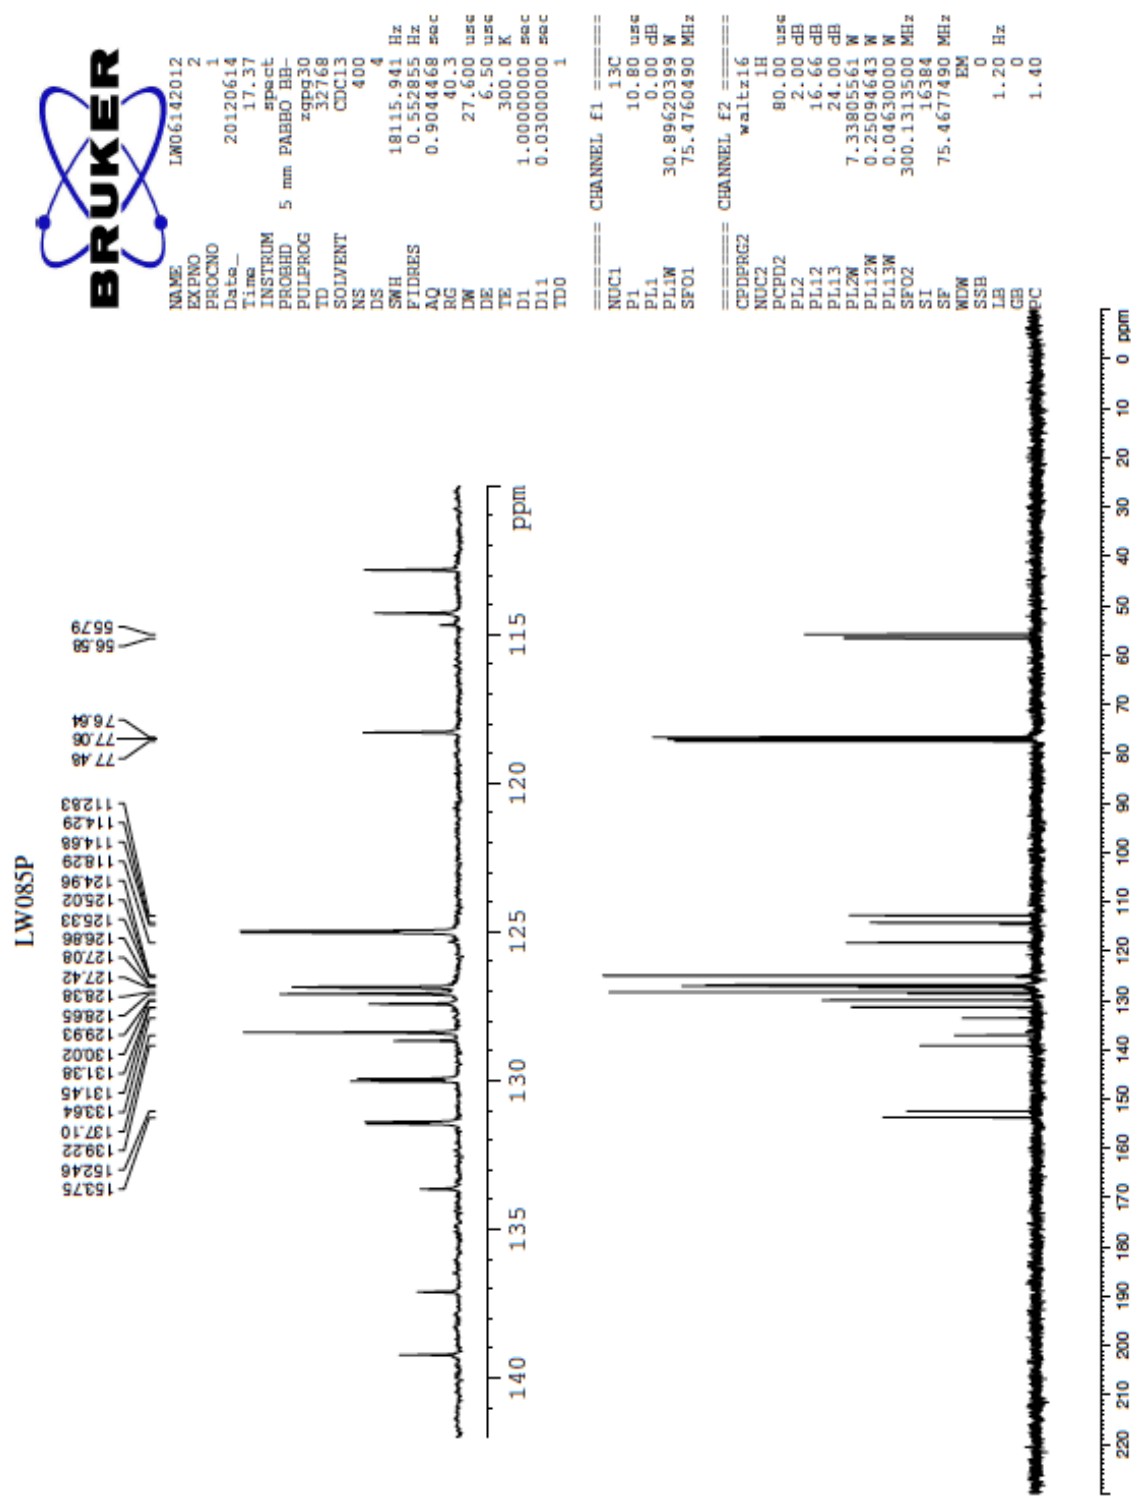



$^{13}\text{C}$  NMR (125 MHz,  $\text{CDCl}_3$ ) spectrum of **16**

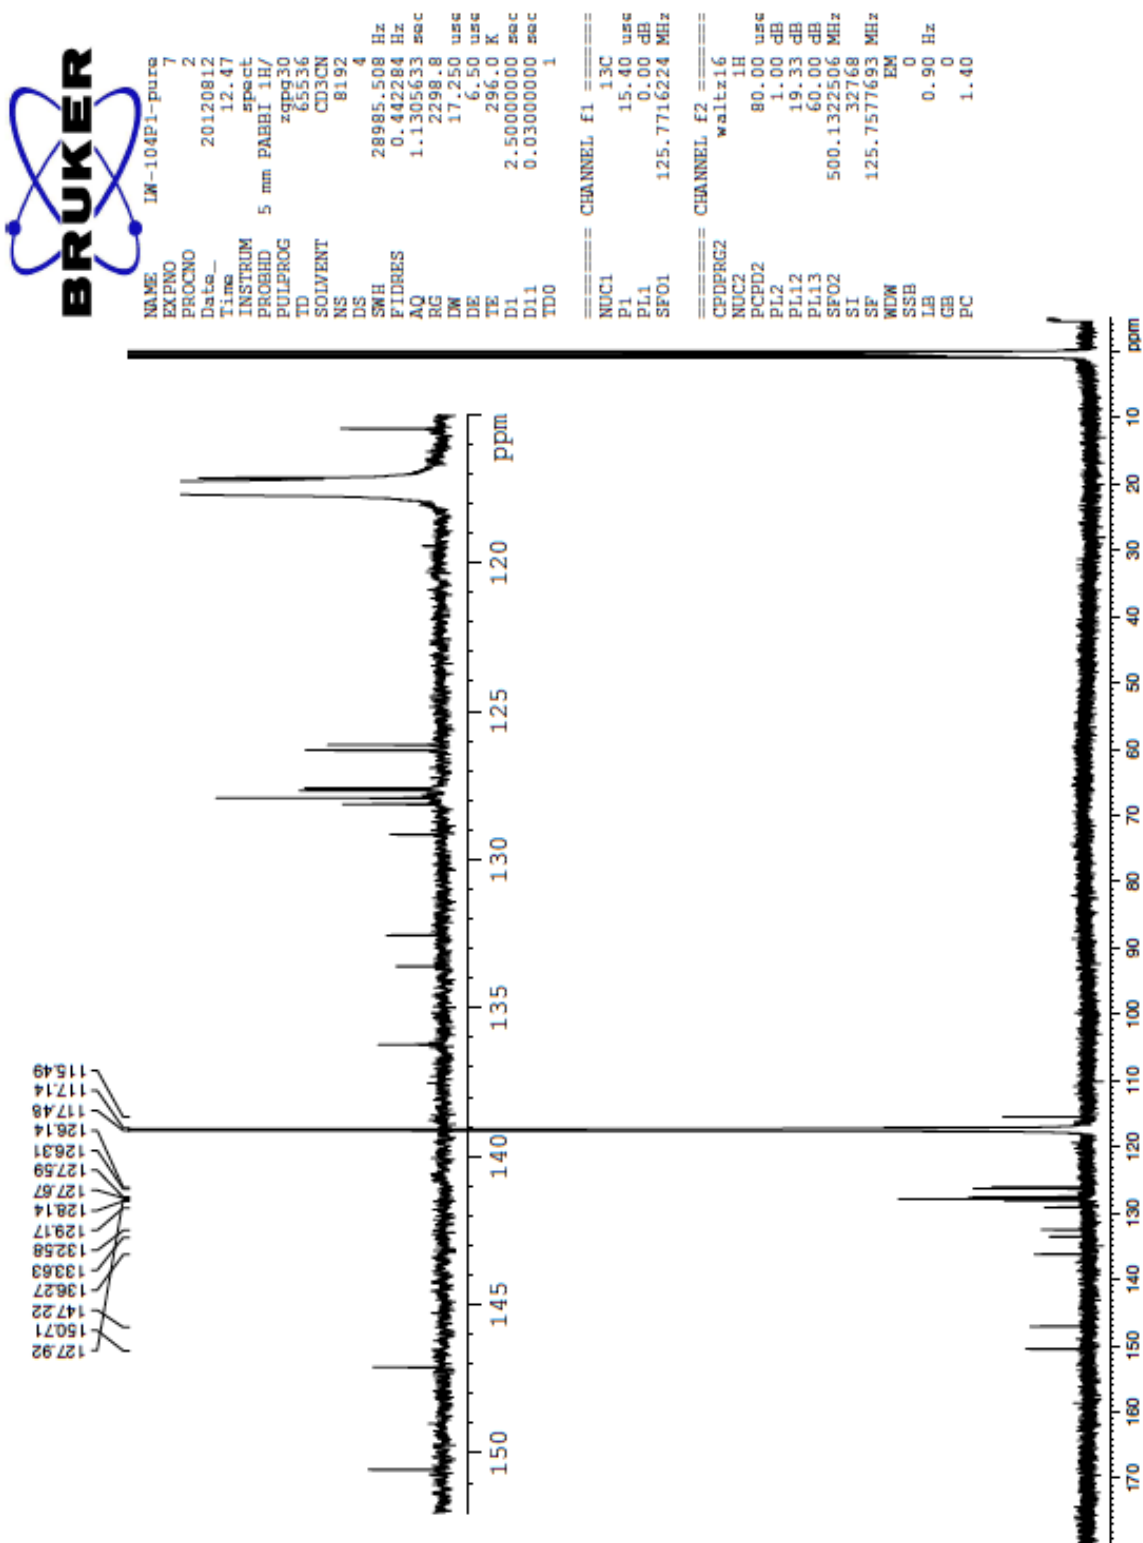



gCOSY spectrum of **16** in CDCl<sub>3</sub>

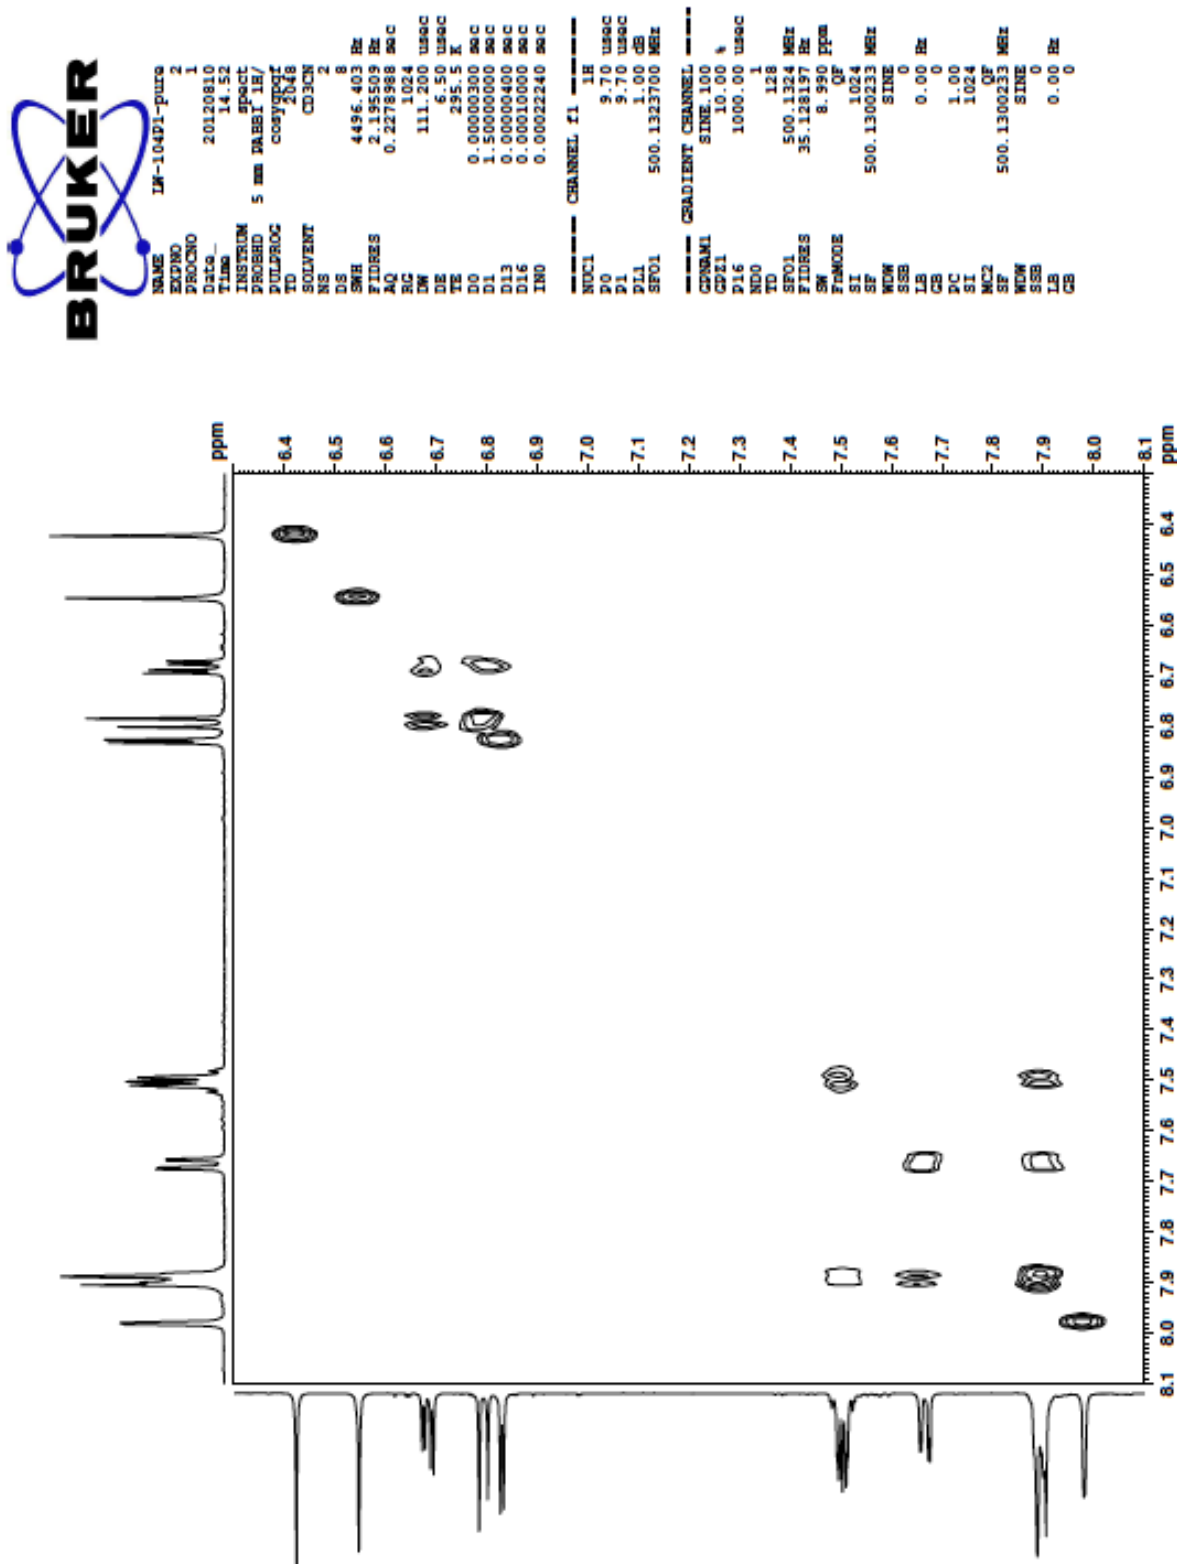

gHMBC spectrum of **16** in CDCl<sub>3</sub>

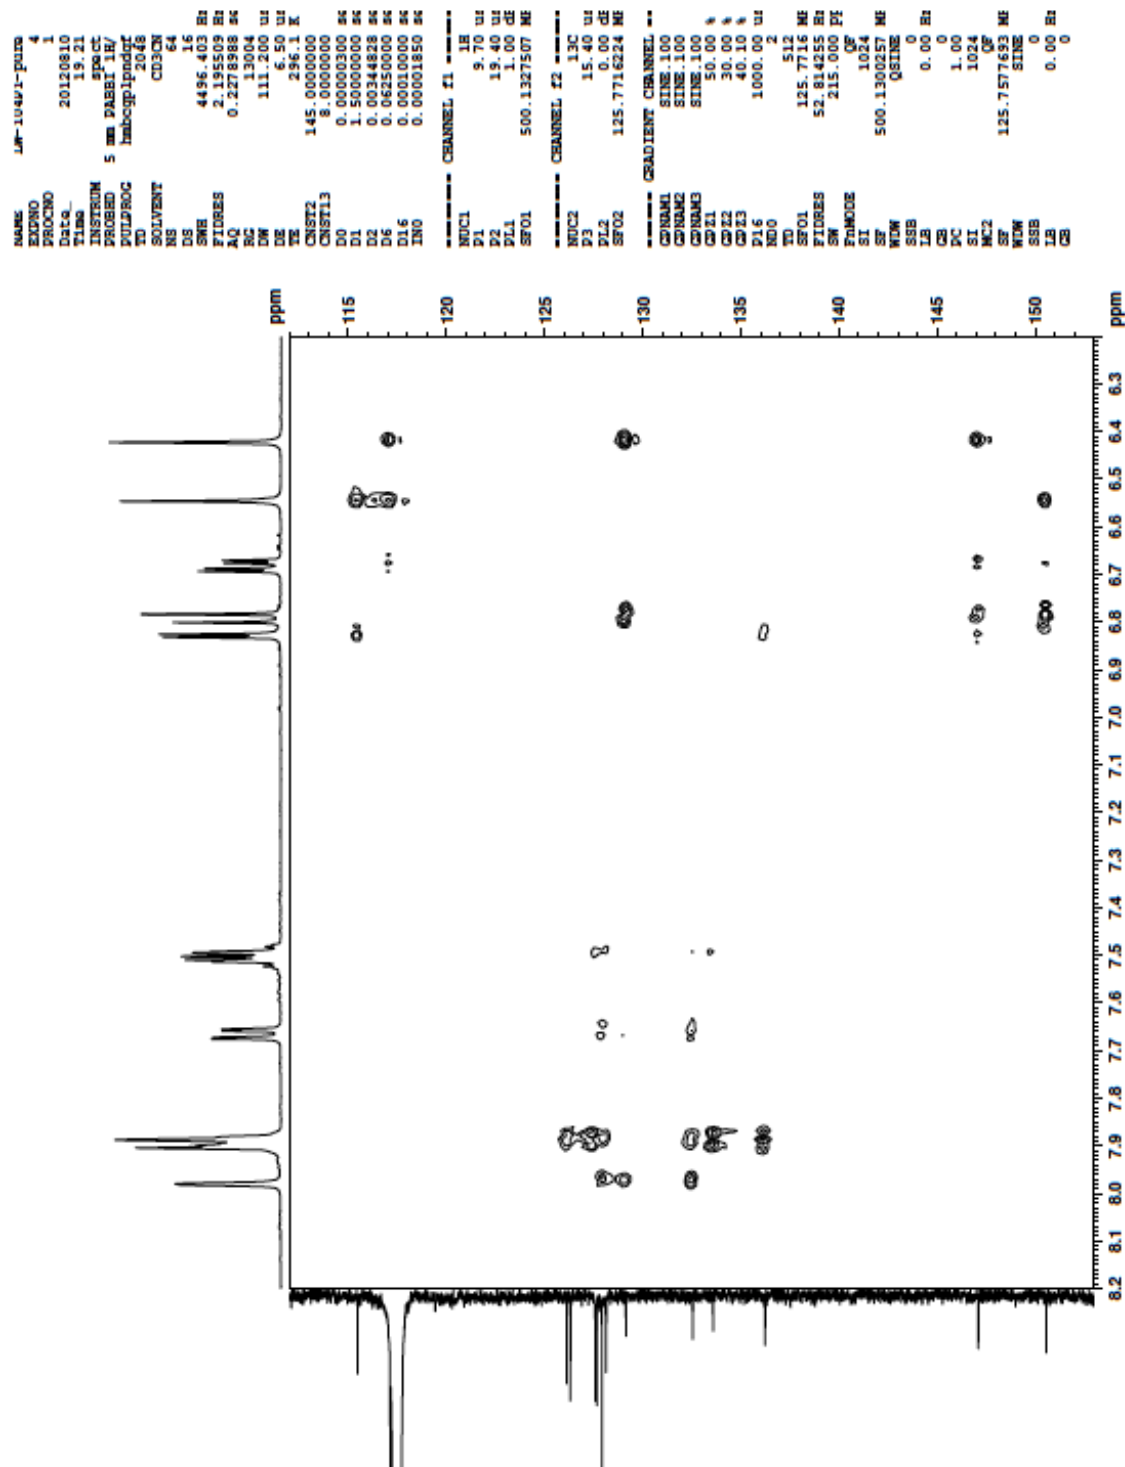

gNOESY spectrum of **16** in CDCl<sub>3</sub>

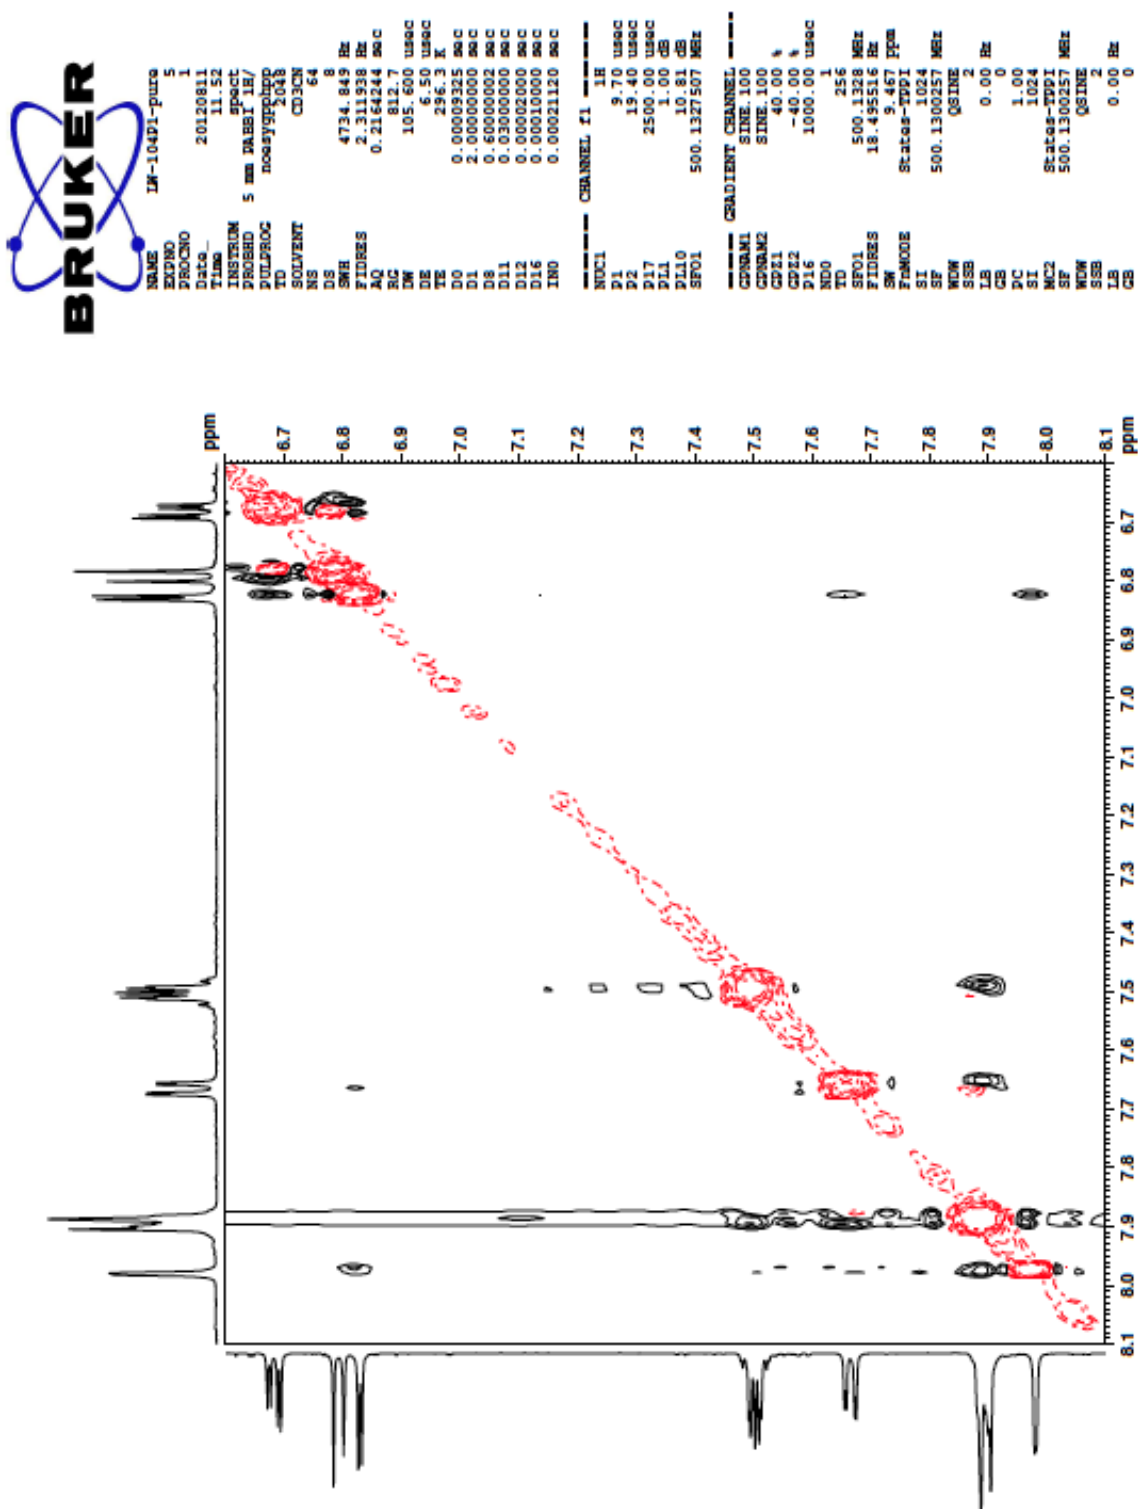

gHSQC spectrum of **16** in CDCl<sub>3</sub>

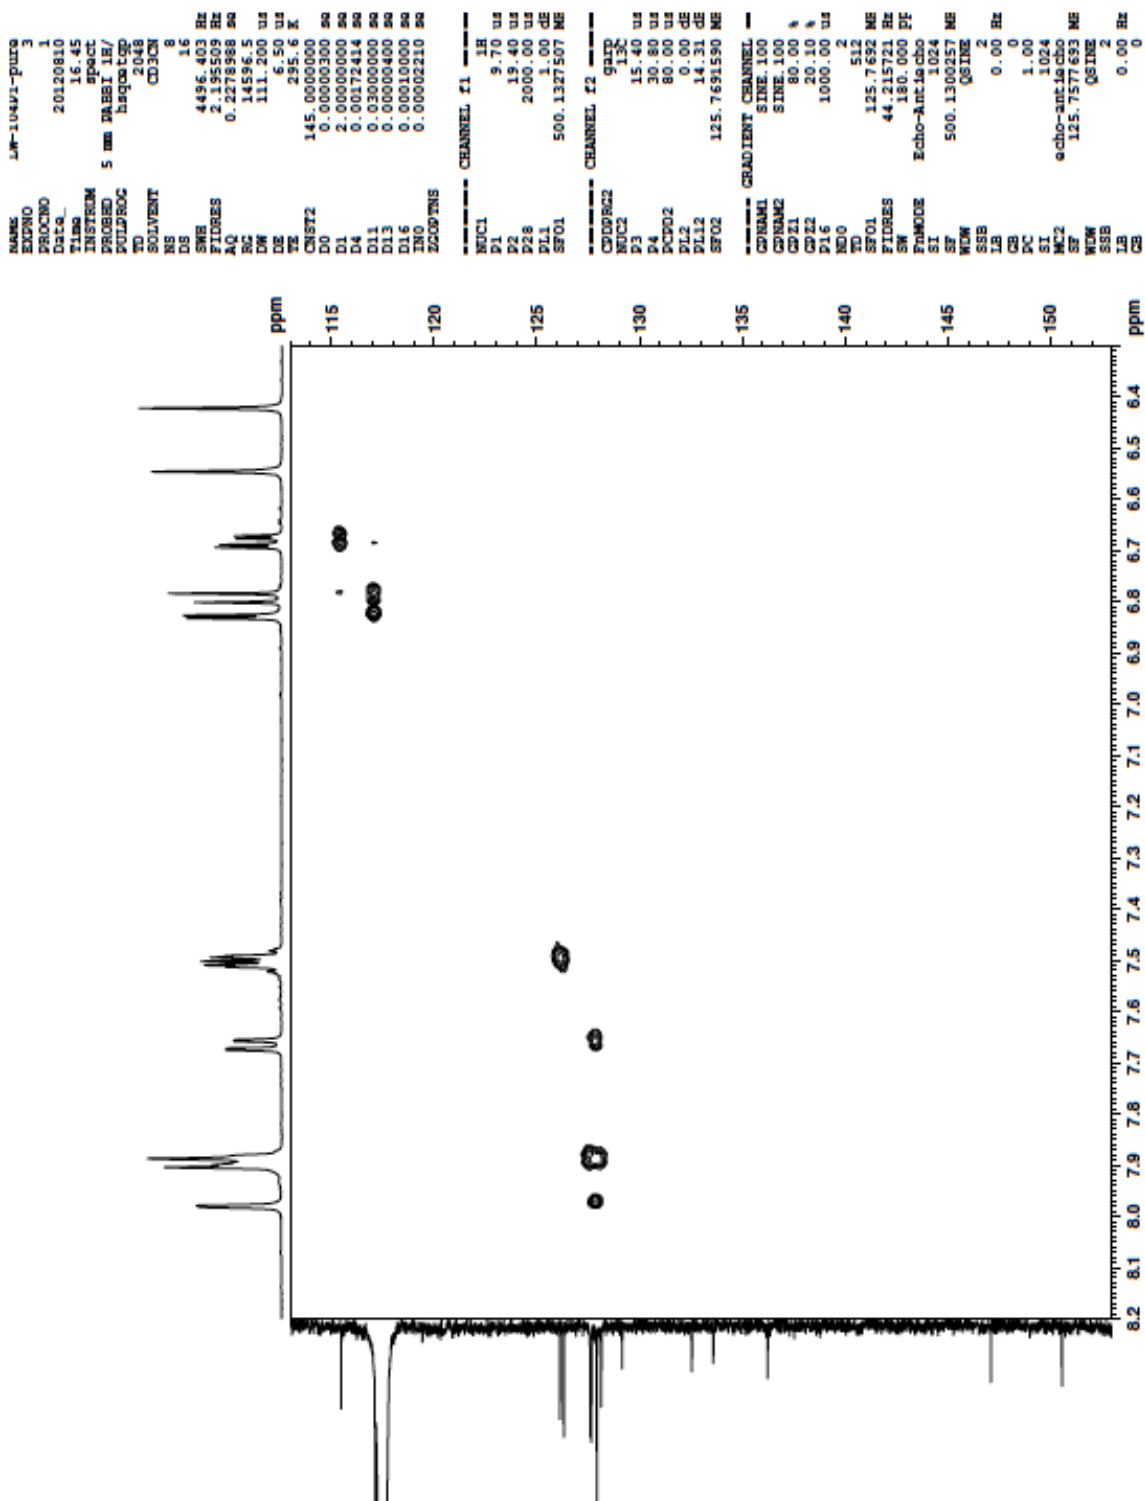



$^{13}\text{C}$  NMR (125 MHz,  $\text{CDCl}_3$ ) spectrum of **17**

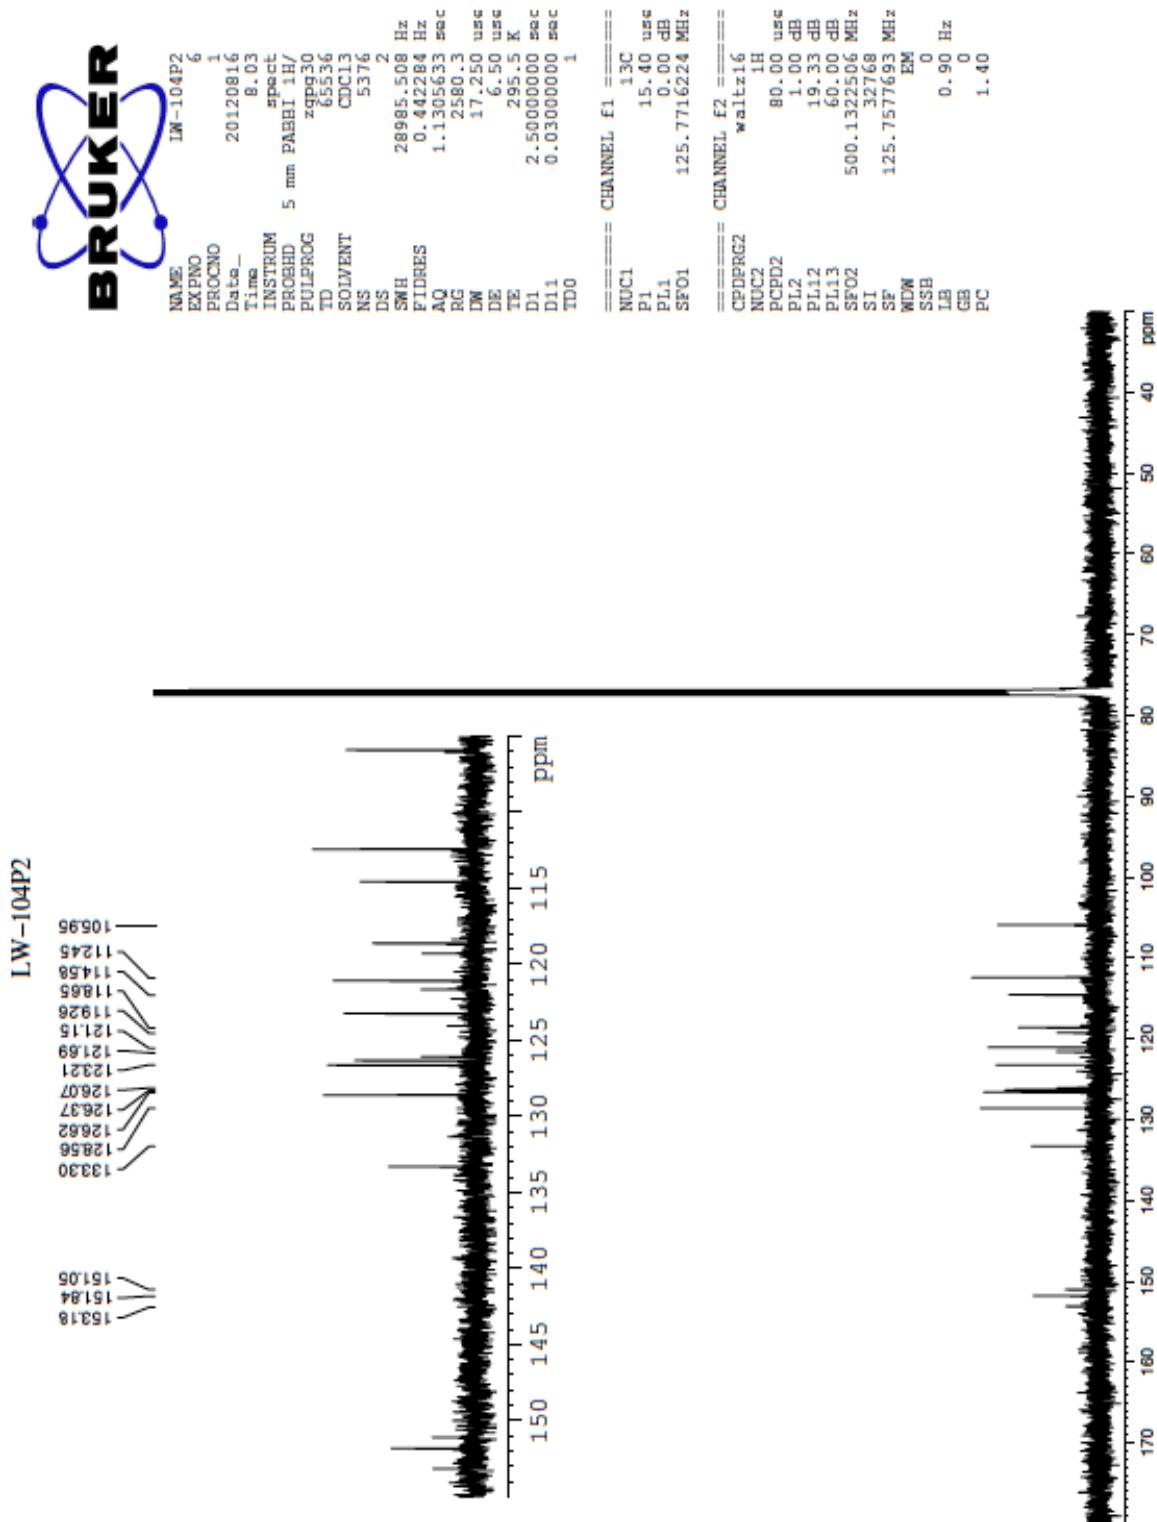

gCOSY spectrum of **17** in CDCl<sub>3</sub>

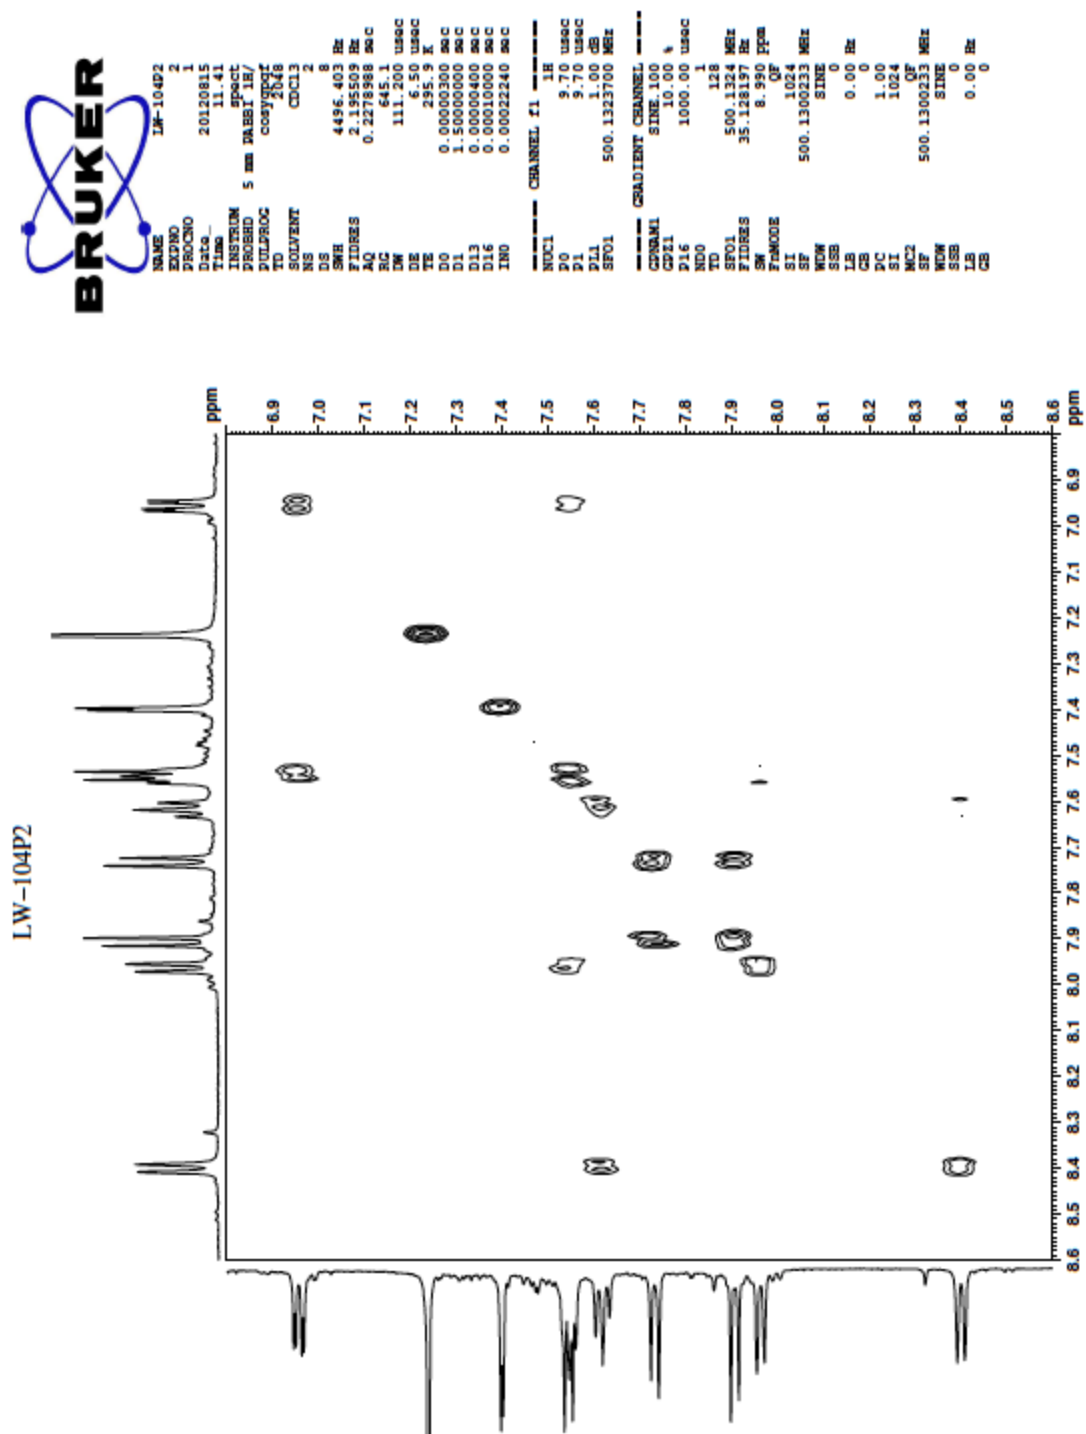





gHSQC spectrum of **17** in CDCl<sub>3</sub>

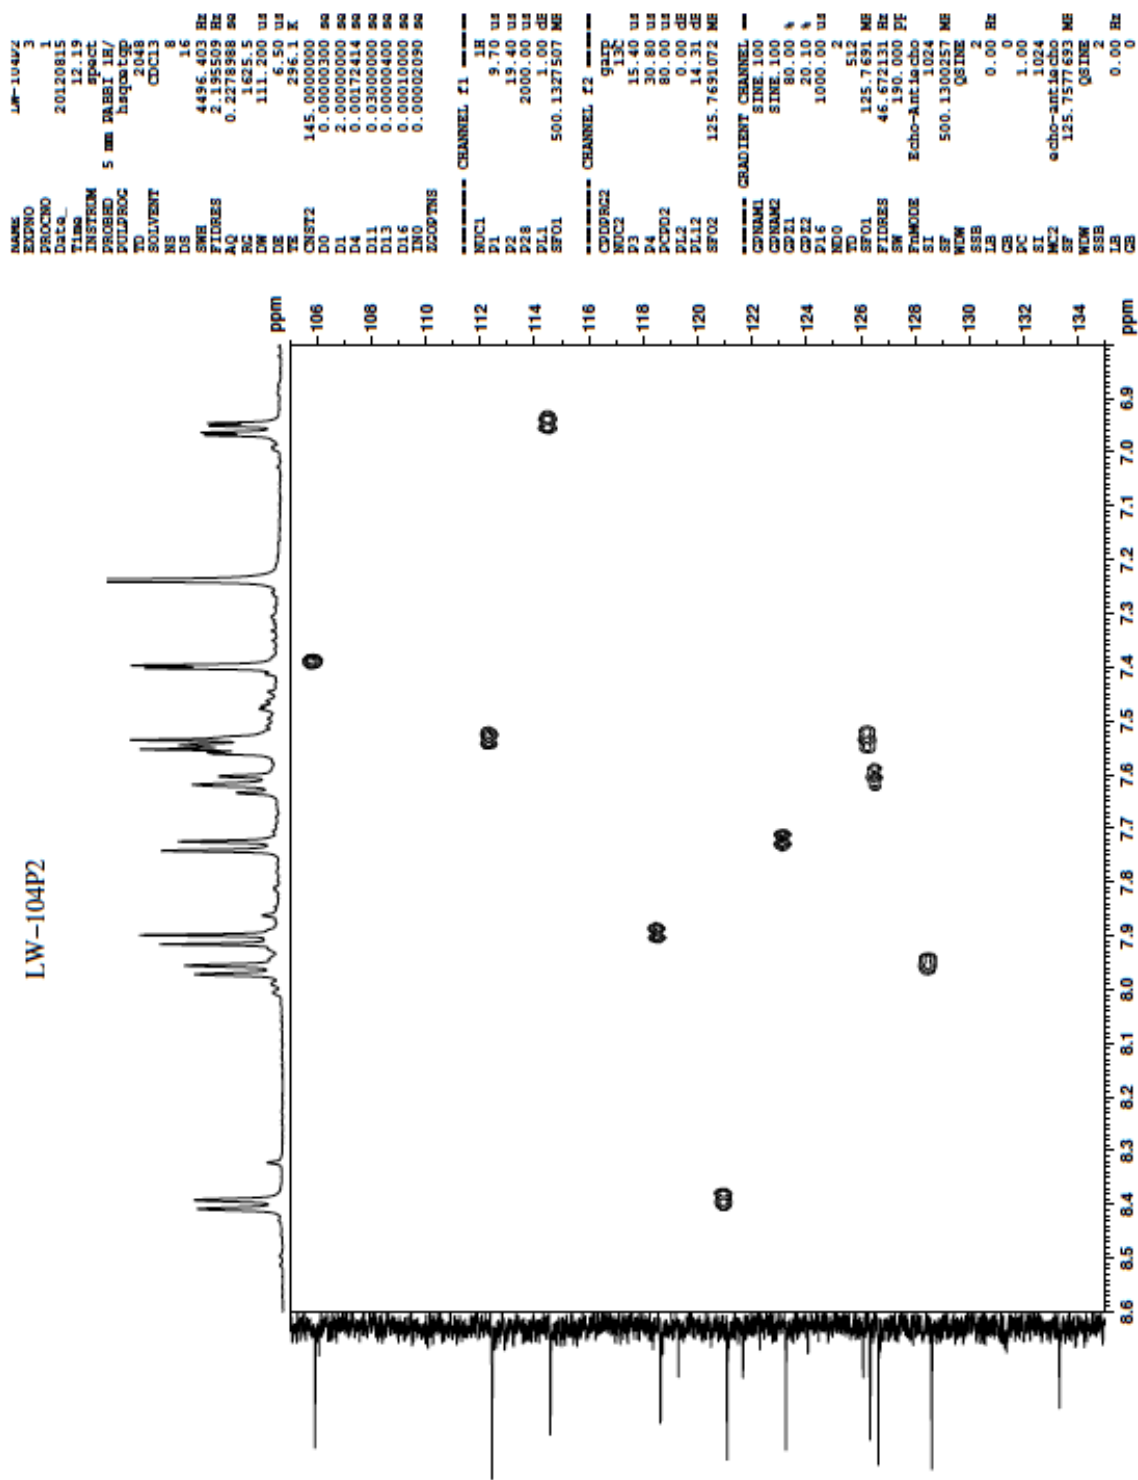

$^1\text{H}$  NMR (500 MHz,  $\text{CDCl}_3$ ) spectrum of **19**

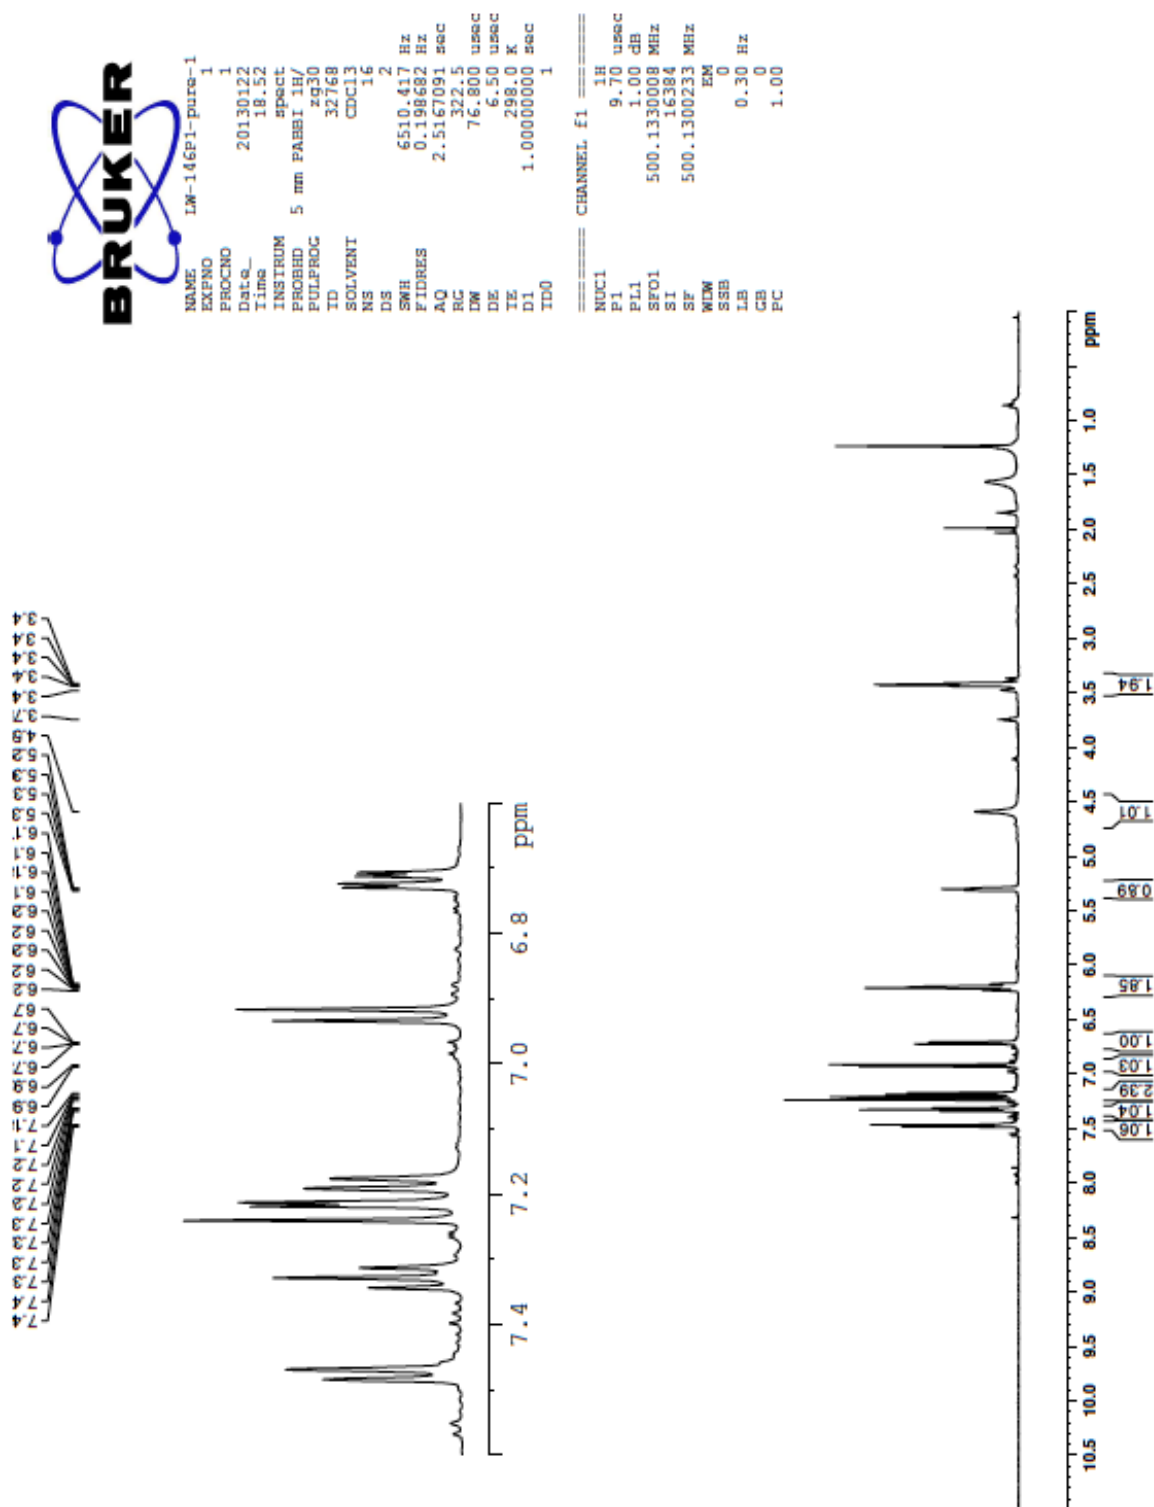

$^{13}\text{C}$  NMR (125 MHz,  $\text{CDCl}_3$ ) spectrum of **19**

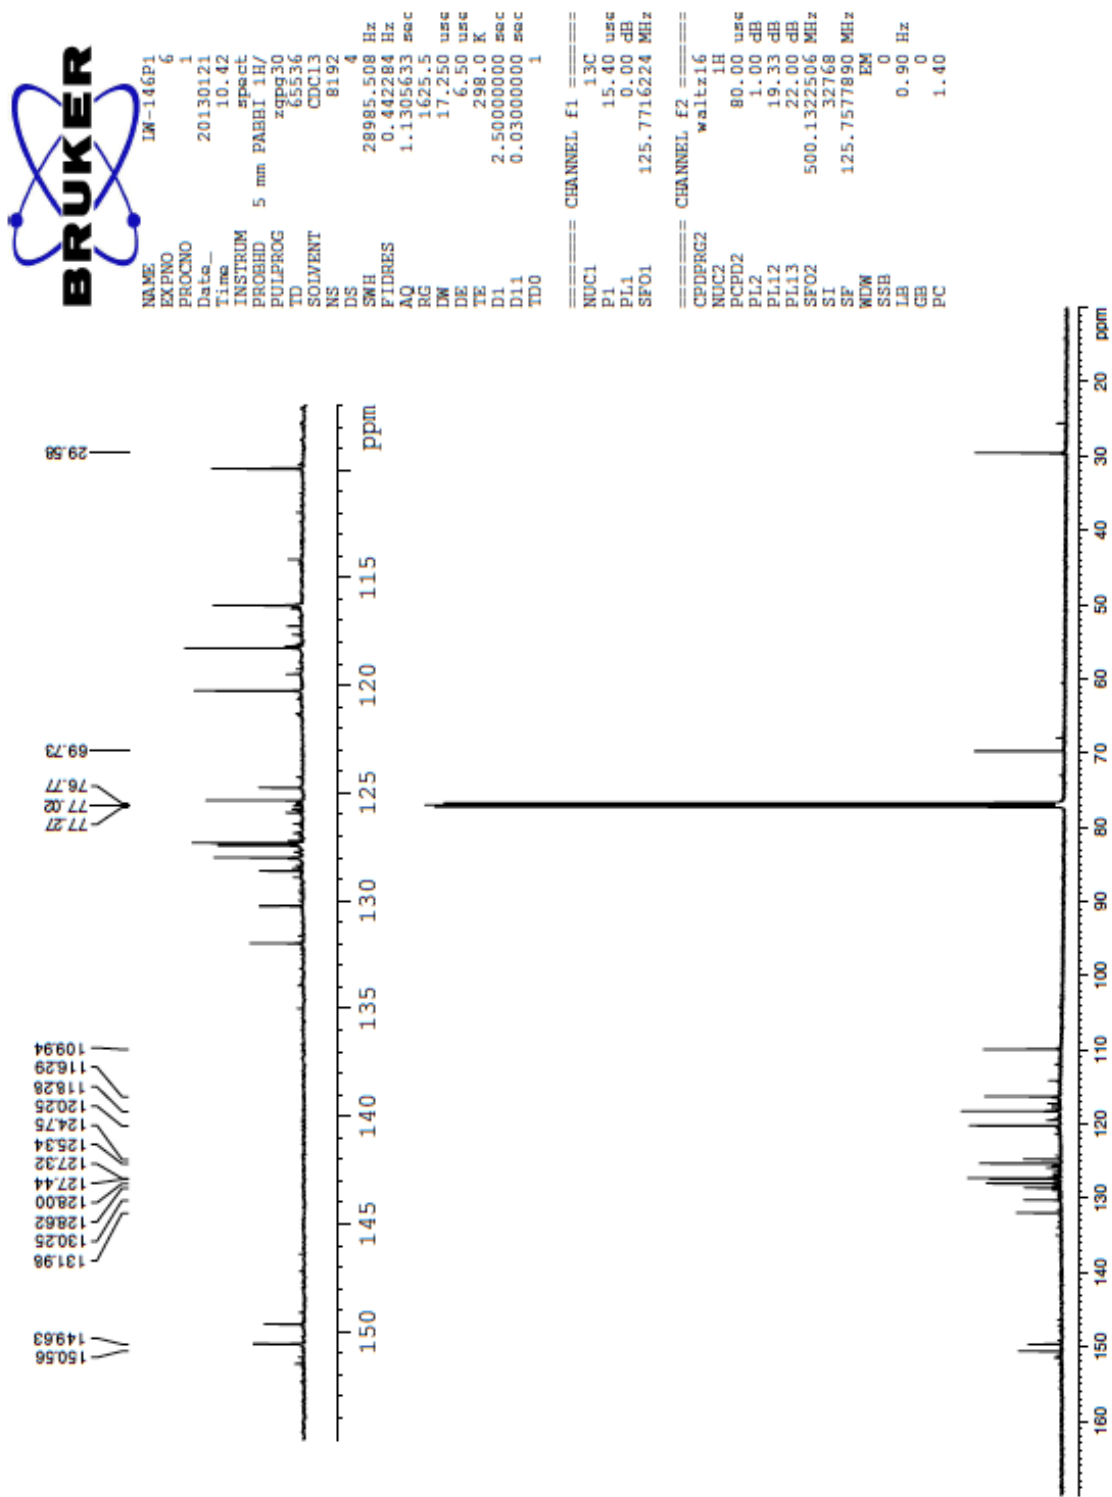

gCOSY spectrum of **19** in CDCl<sub>3</sub>

**BRUKER**

NAME LW-146P1  
EXPNO 2  
PROCNO 1  
Date\_ 20130120  
Time 13.07  
INSTRUM spect  
PROBHD 5 mm DABBI 1H/  
PULPROG zgpg30  
TD 2048  
SOLVENT CDCl3  
NS 2  
DS 8  
SWH 4496.403 Hz  
FIDRES 2.195509 Hz  
AQ 0.2278988 sec  
RG 256  
RW 111.200 ussec  
DE 6.50 ussec  
TE 298.0 K  
D0 0.0000300 sec  
D1 1.5000000 sec  
D13 0.0000400 sec  
D16 0.0001000 sec  
TD 0.0002240 sec

----- CHANNEL f1 -----  
NUC1 1H  
P0 9.70 ussec  
P1 9.70 ussec  
P2 1.00 ussec  
SFO1 500.1323700 MHz

----- GRADIENT CHANNEL -----  
CONAM1 SINE.100  
CPE1 10.00 %  
P16 1000.00 ussec  
NDO 1  
TD 128  
SFO1 500.1324 MHz  
FIDRES 35.128197 Hz  
SW 8.990 ppm  
FAMODE OF  
SI 1024  
SF 500.1300233 MHz  
WDW SINE  
SSB 0  
LB 0.00 Hz  
CB 0  
PC 4.00  
SI 1024  
MC2 OF  
SF 500.1300233 MHz  
WDW SINE  
SSB 0  
LB 0.00 Hz  
CB 0

LW-146P1

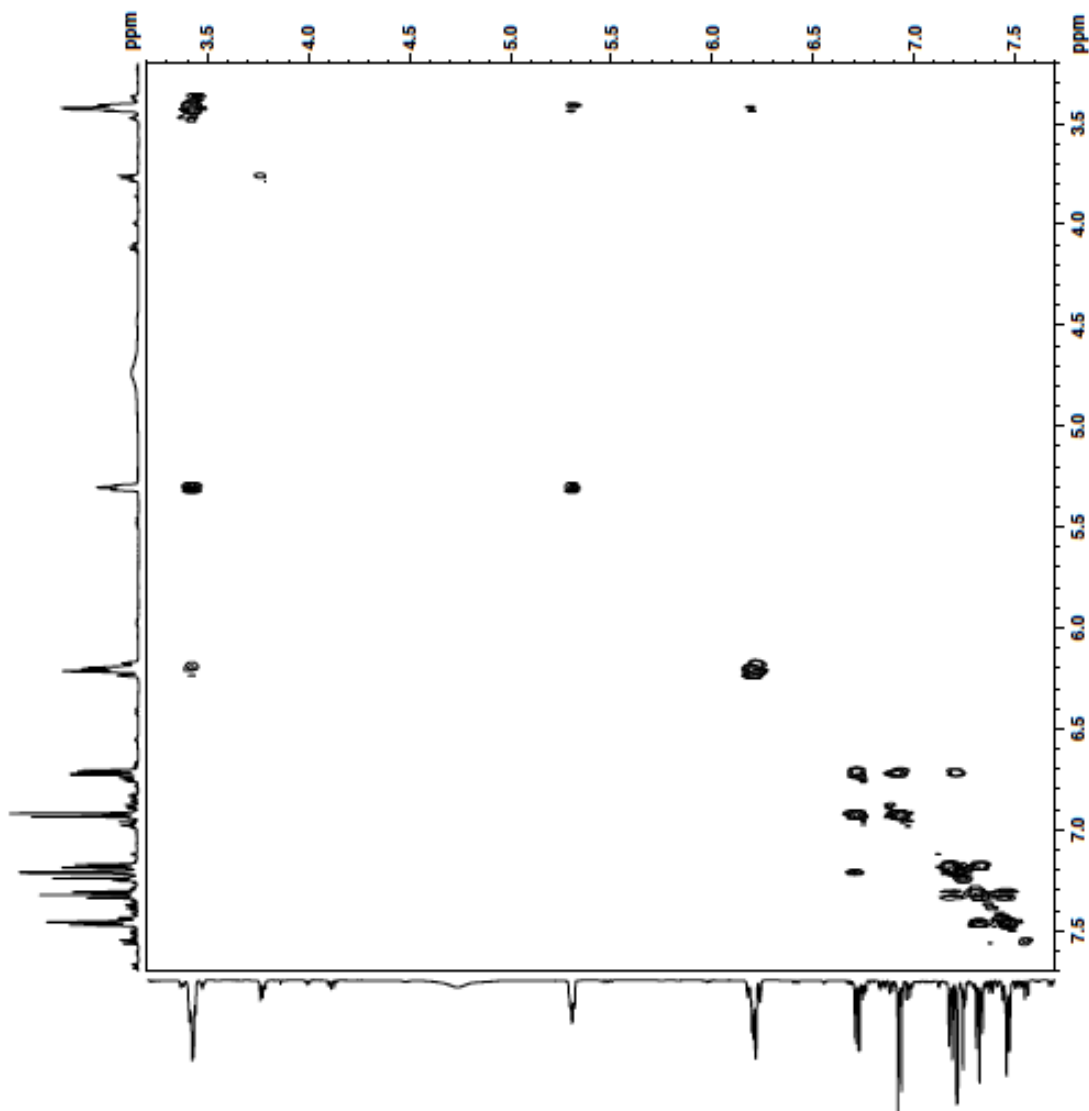

gNOESY spectrum of **19** in CDCl<sub>3</sub>

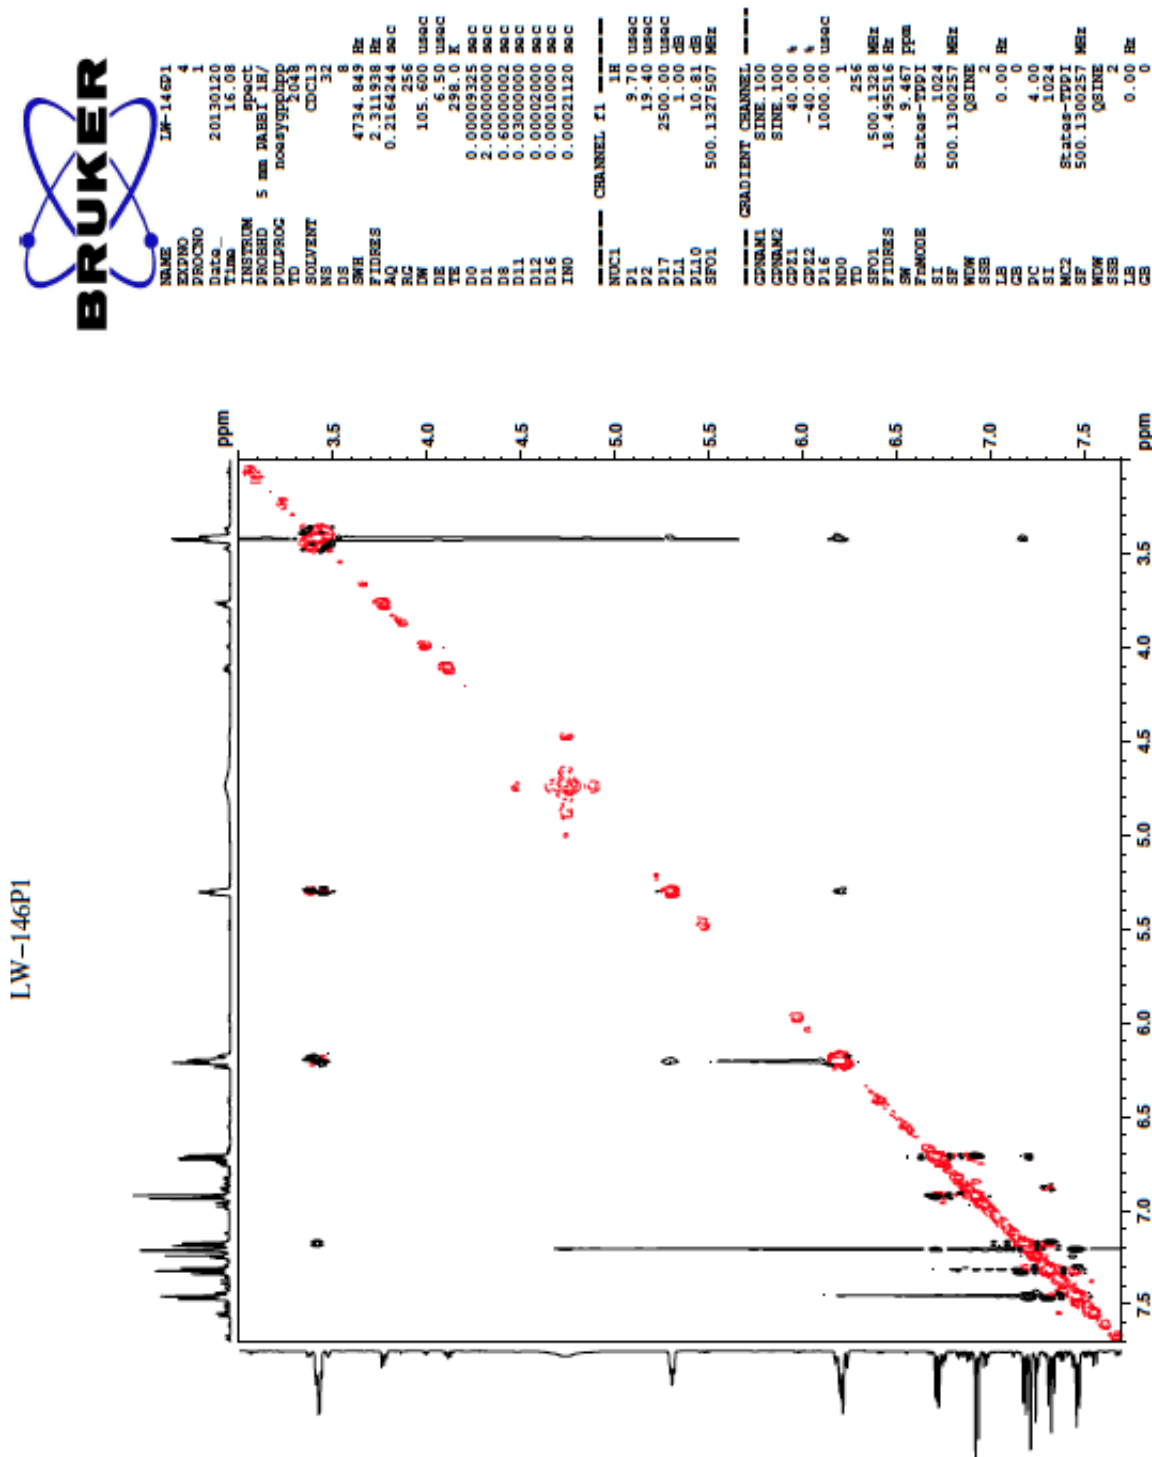

DEPT135 (125 MHz, CDCl<sub>3</sub>) spectrum of **19**

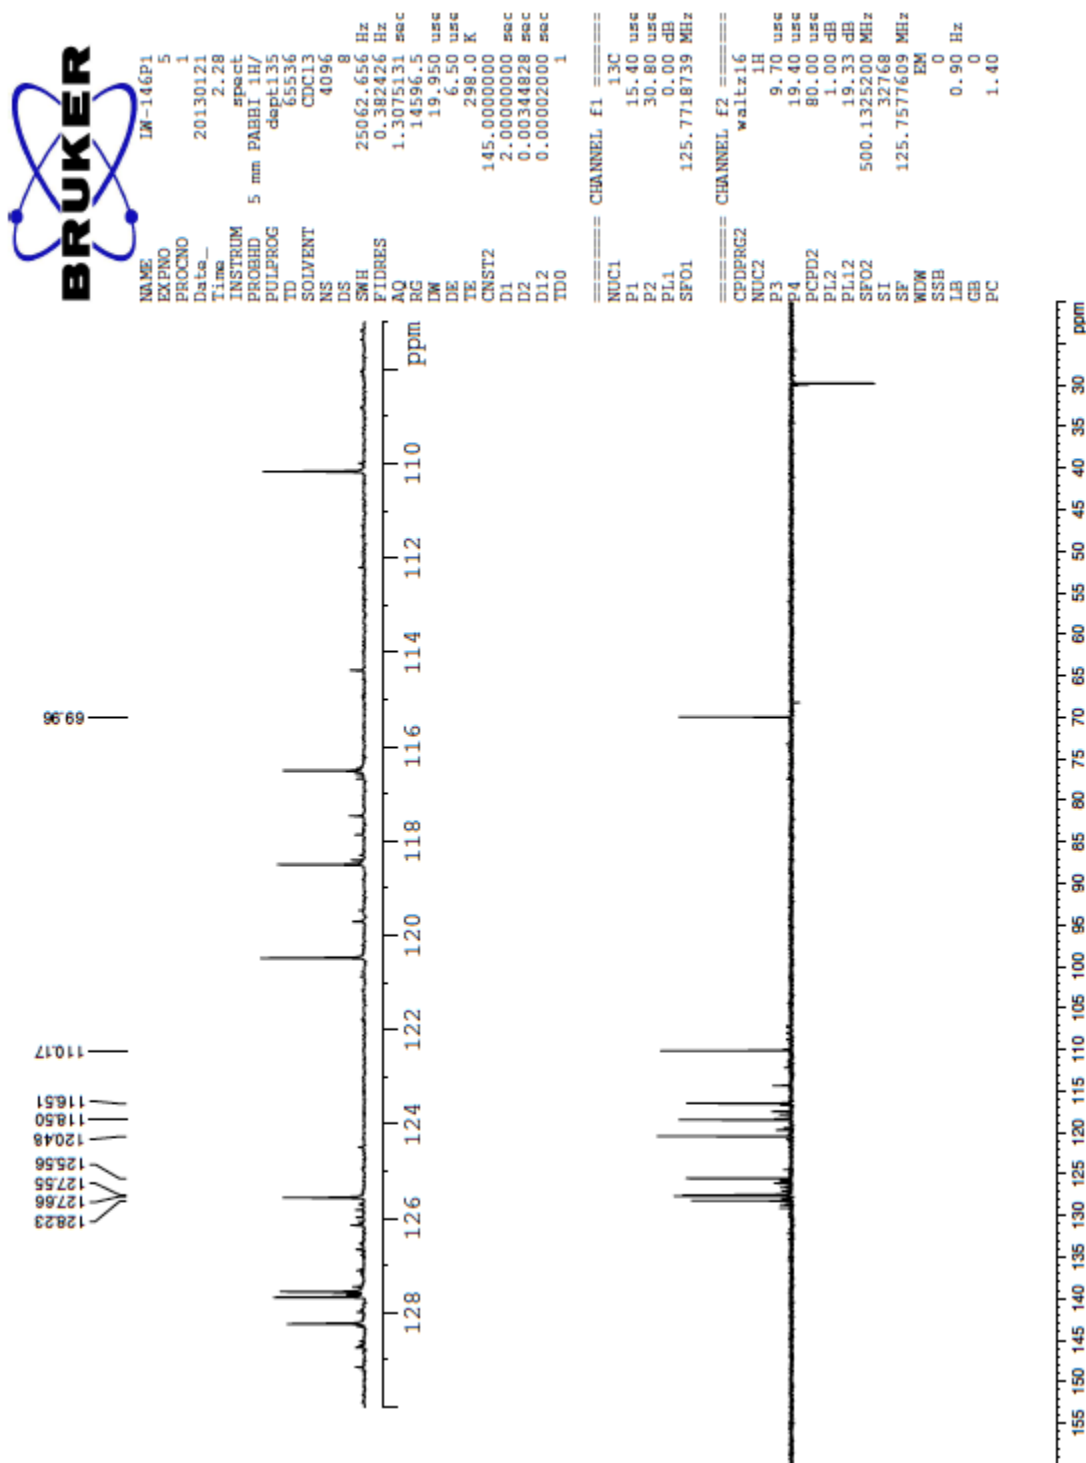

gHSQC spectrum of **19** in CDCl<sub>3</sub>

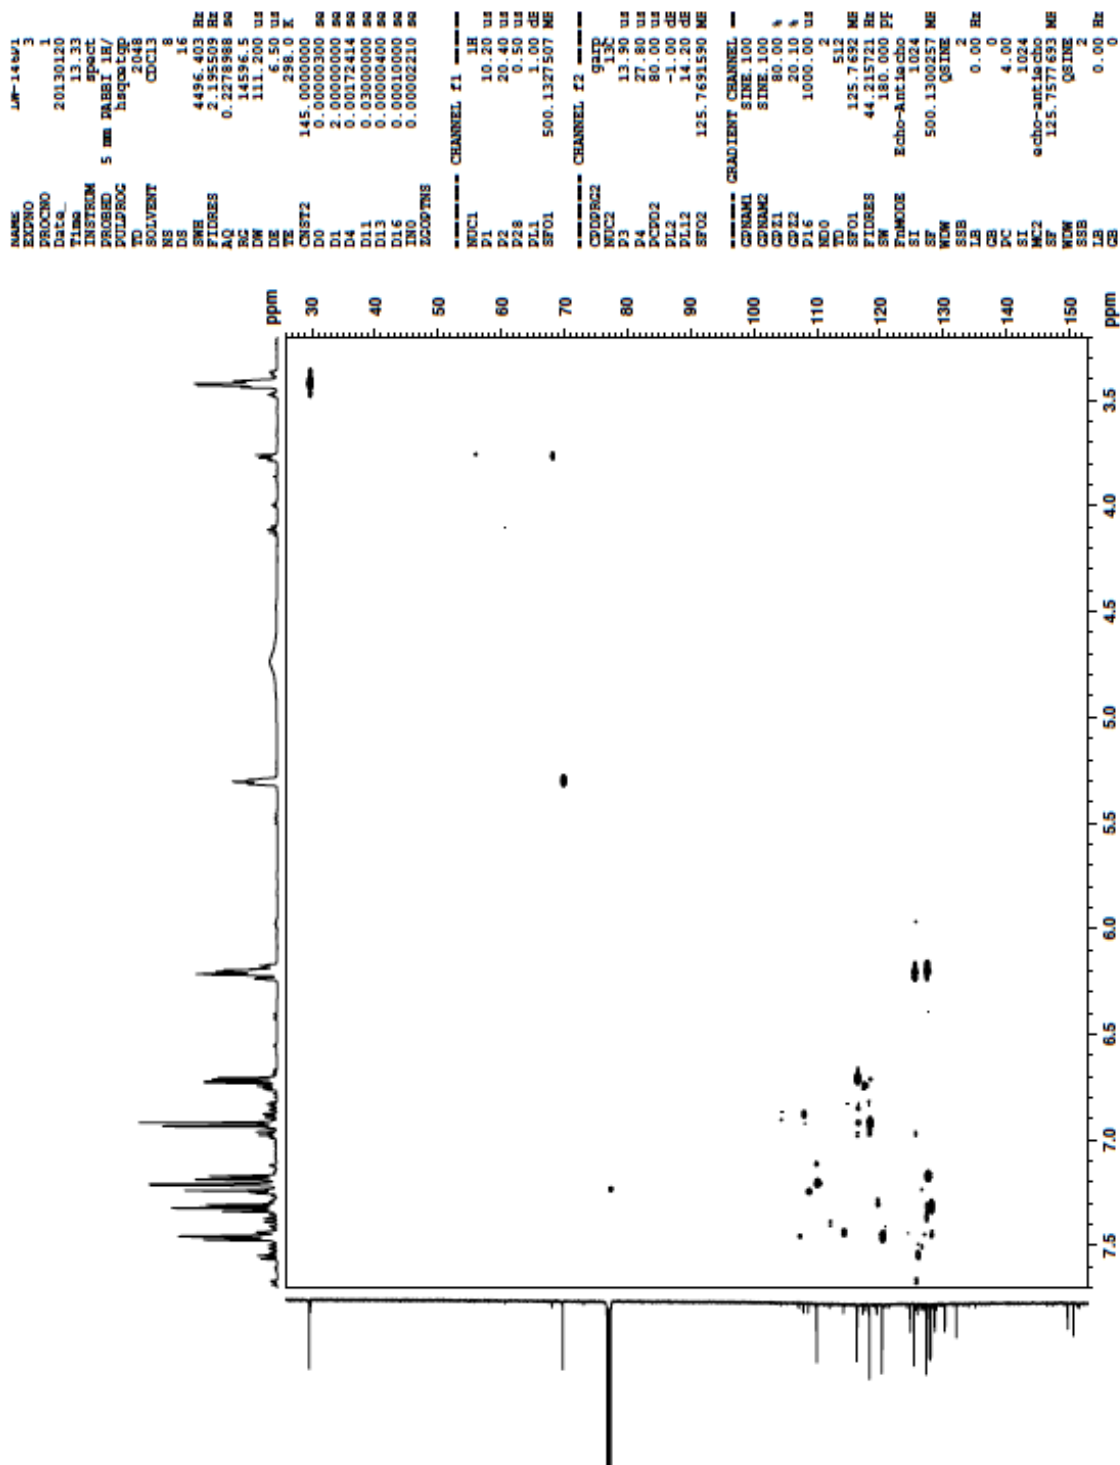





gCOSY spectrum of **23** in CDCl<sub>3</sub>

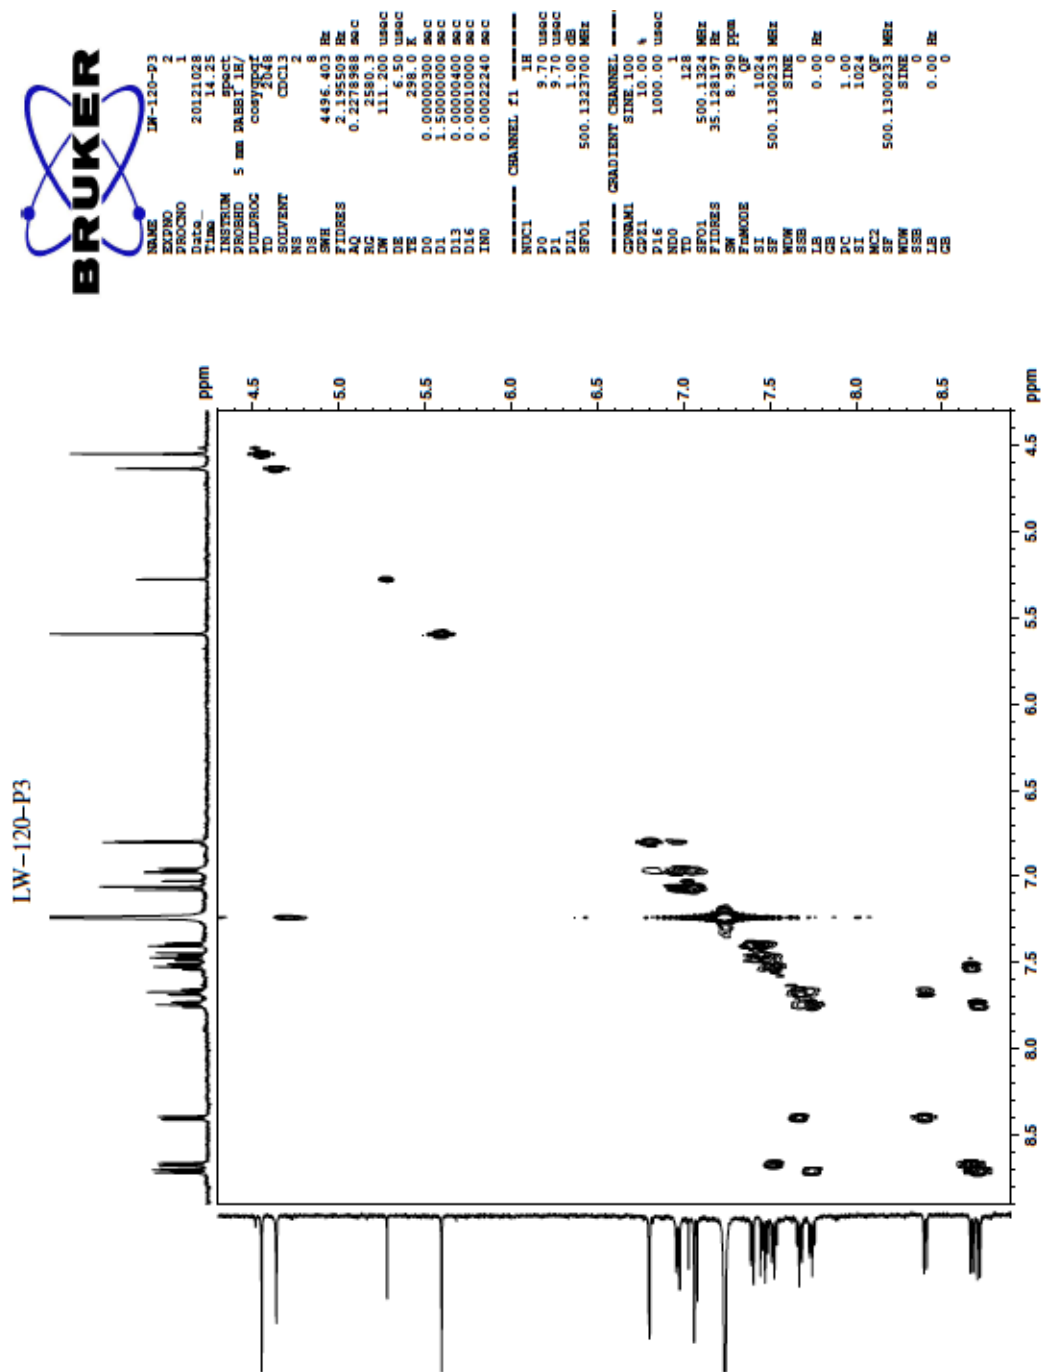



$^{13}\text{C}$  NMR (125 MHz,  $\text{CDCl}_3$ ) spectrum of **24**

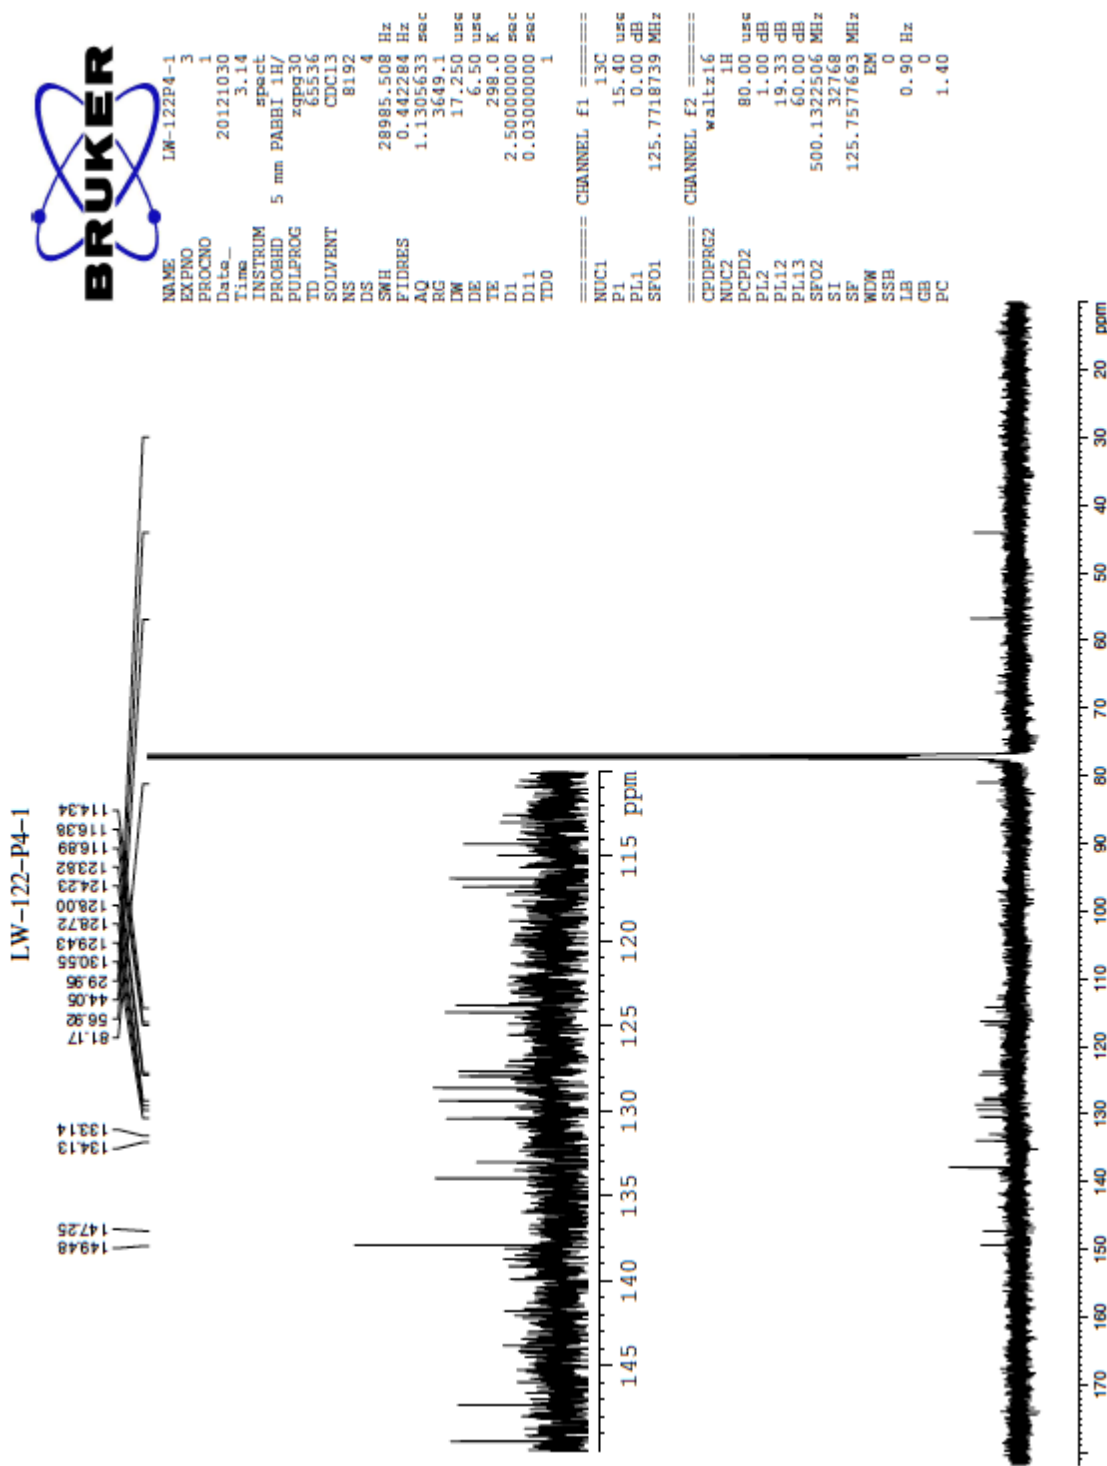

gCOSY spectrum of **24** in CDCl<sub>3</sub>

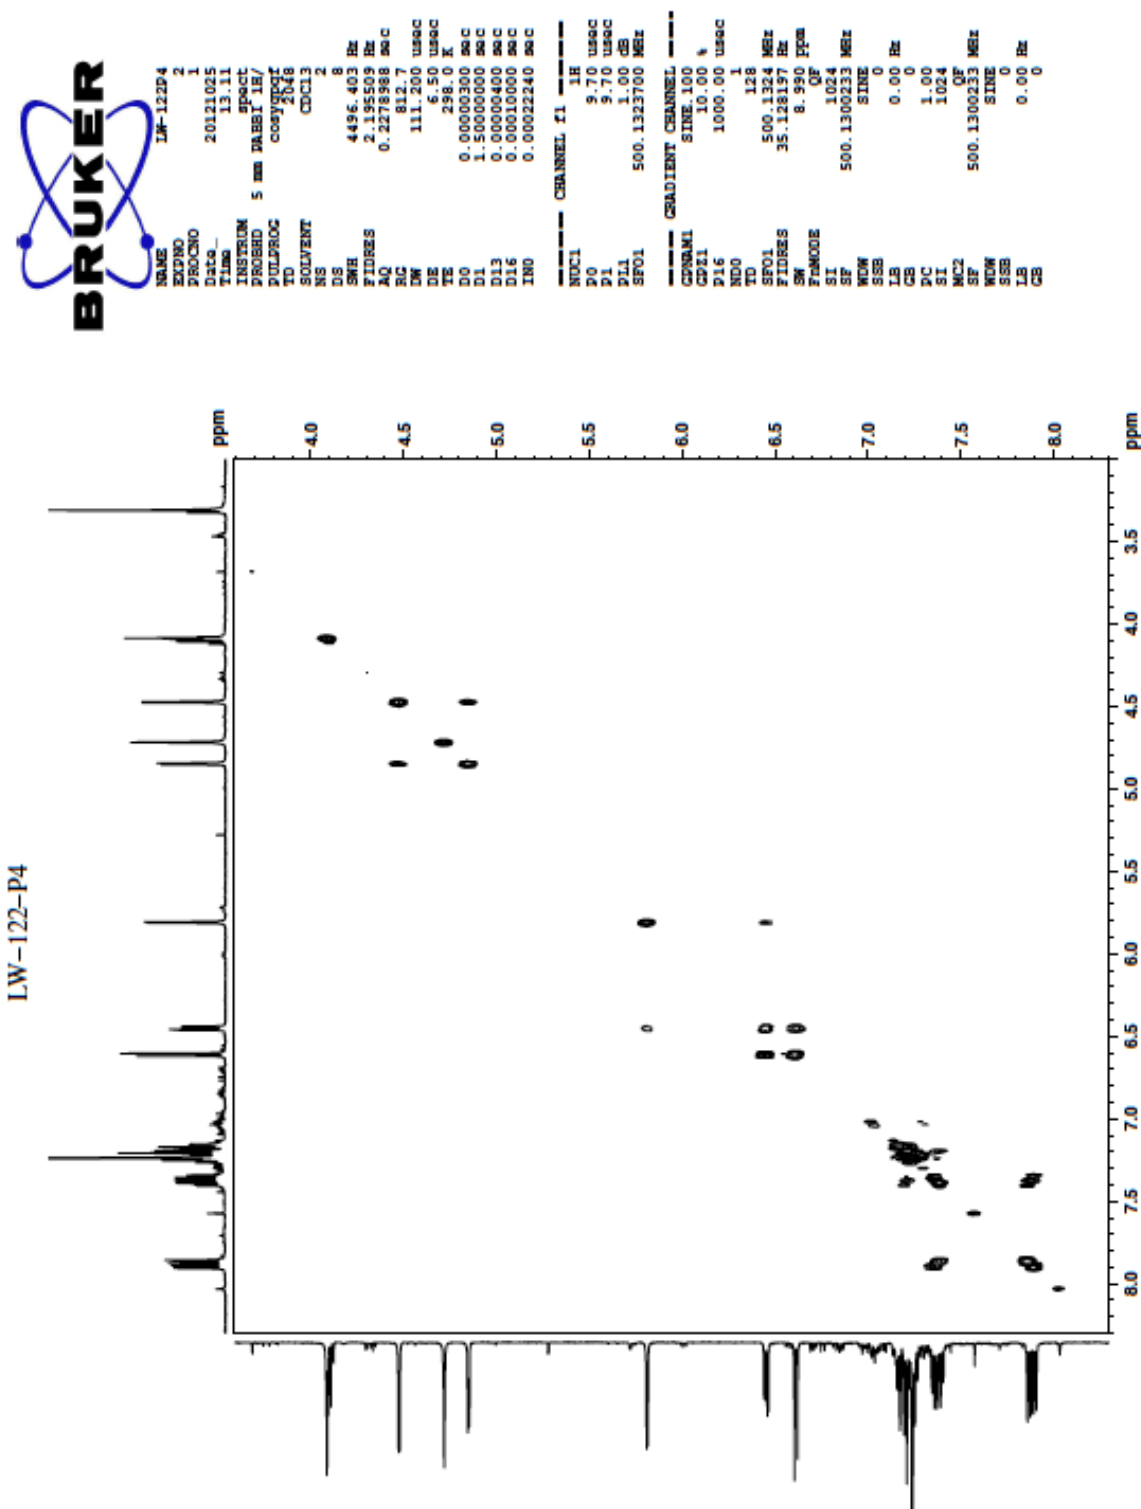



gHSQC spectrum of **24** in CDCl<sub>3</sub>

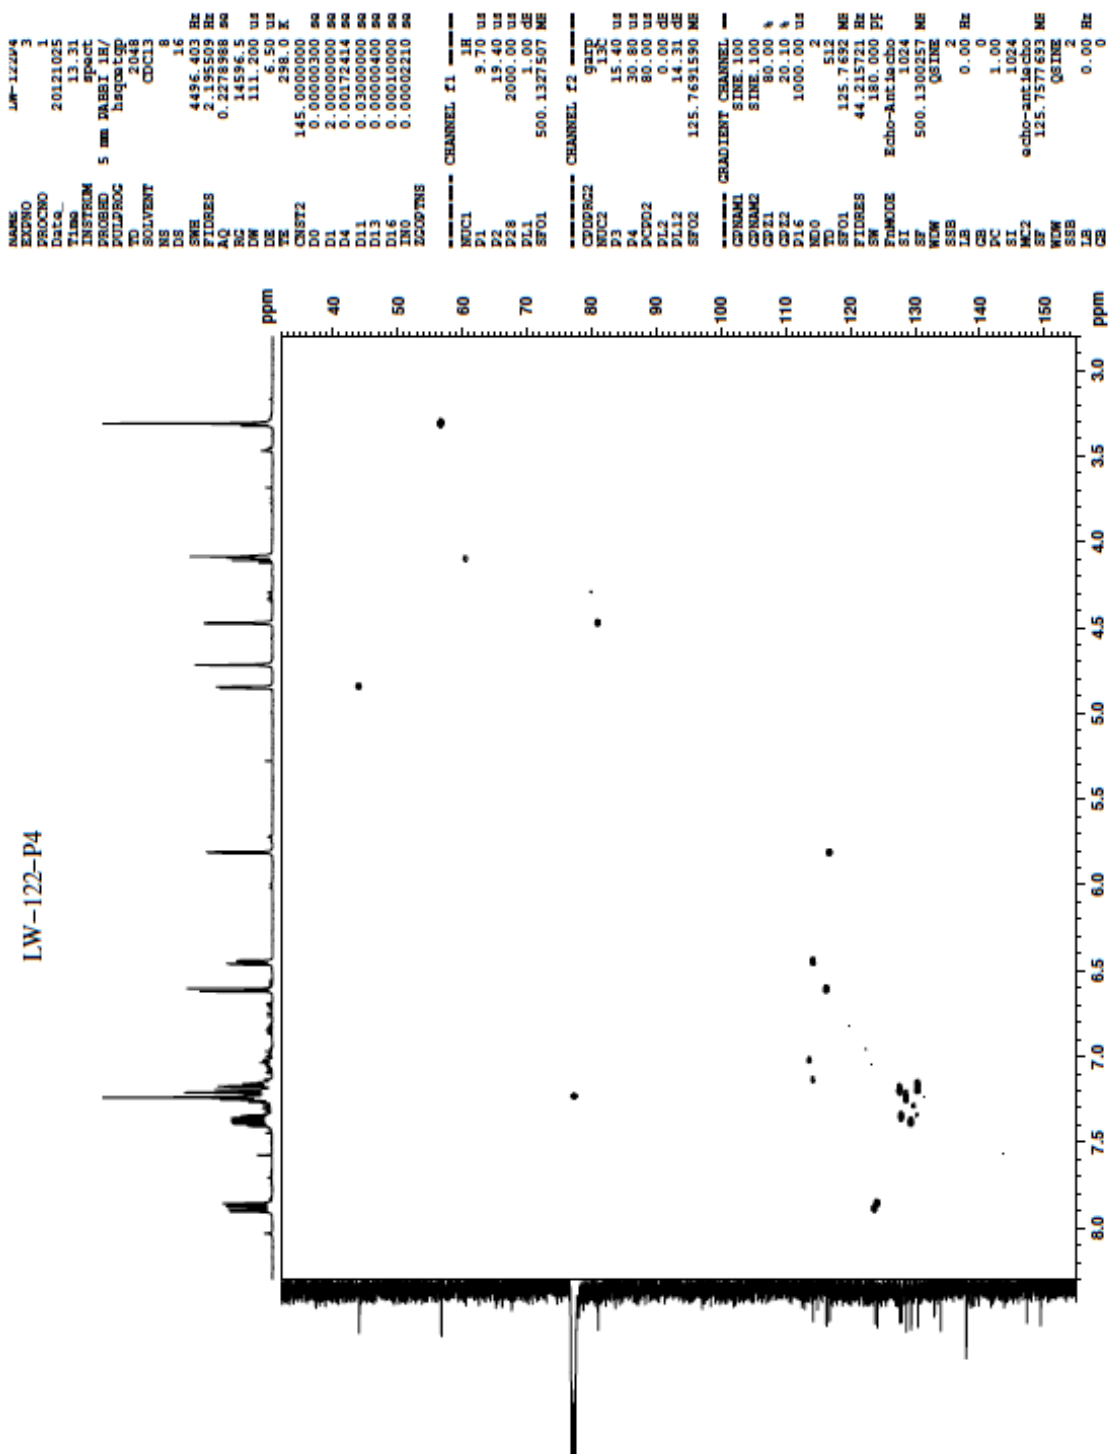

DEPT135 NMR (125 MHz, CDCl<sub>3</sub>) spectrum of **24**

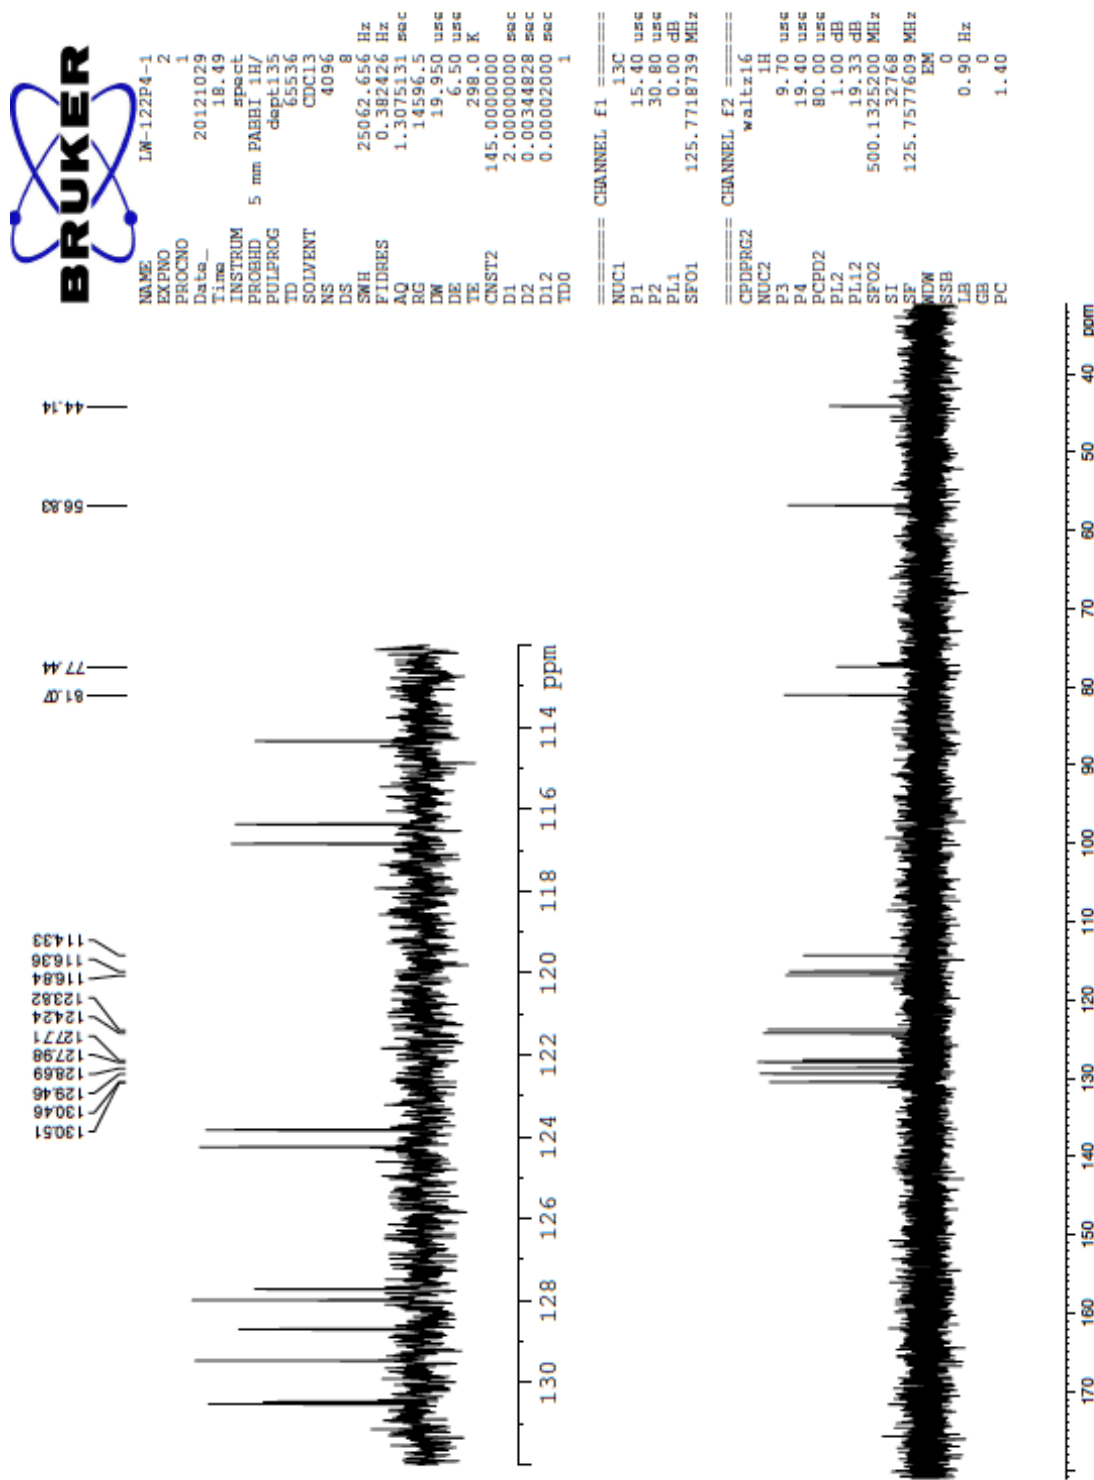

$^1\text{H}$  NMR (500 MHz,  $\text{CDCl}_3$ ) spectrum of **28**

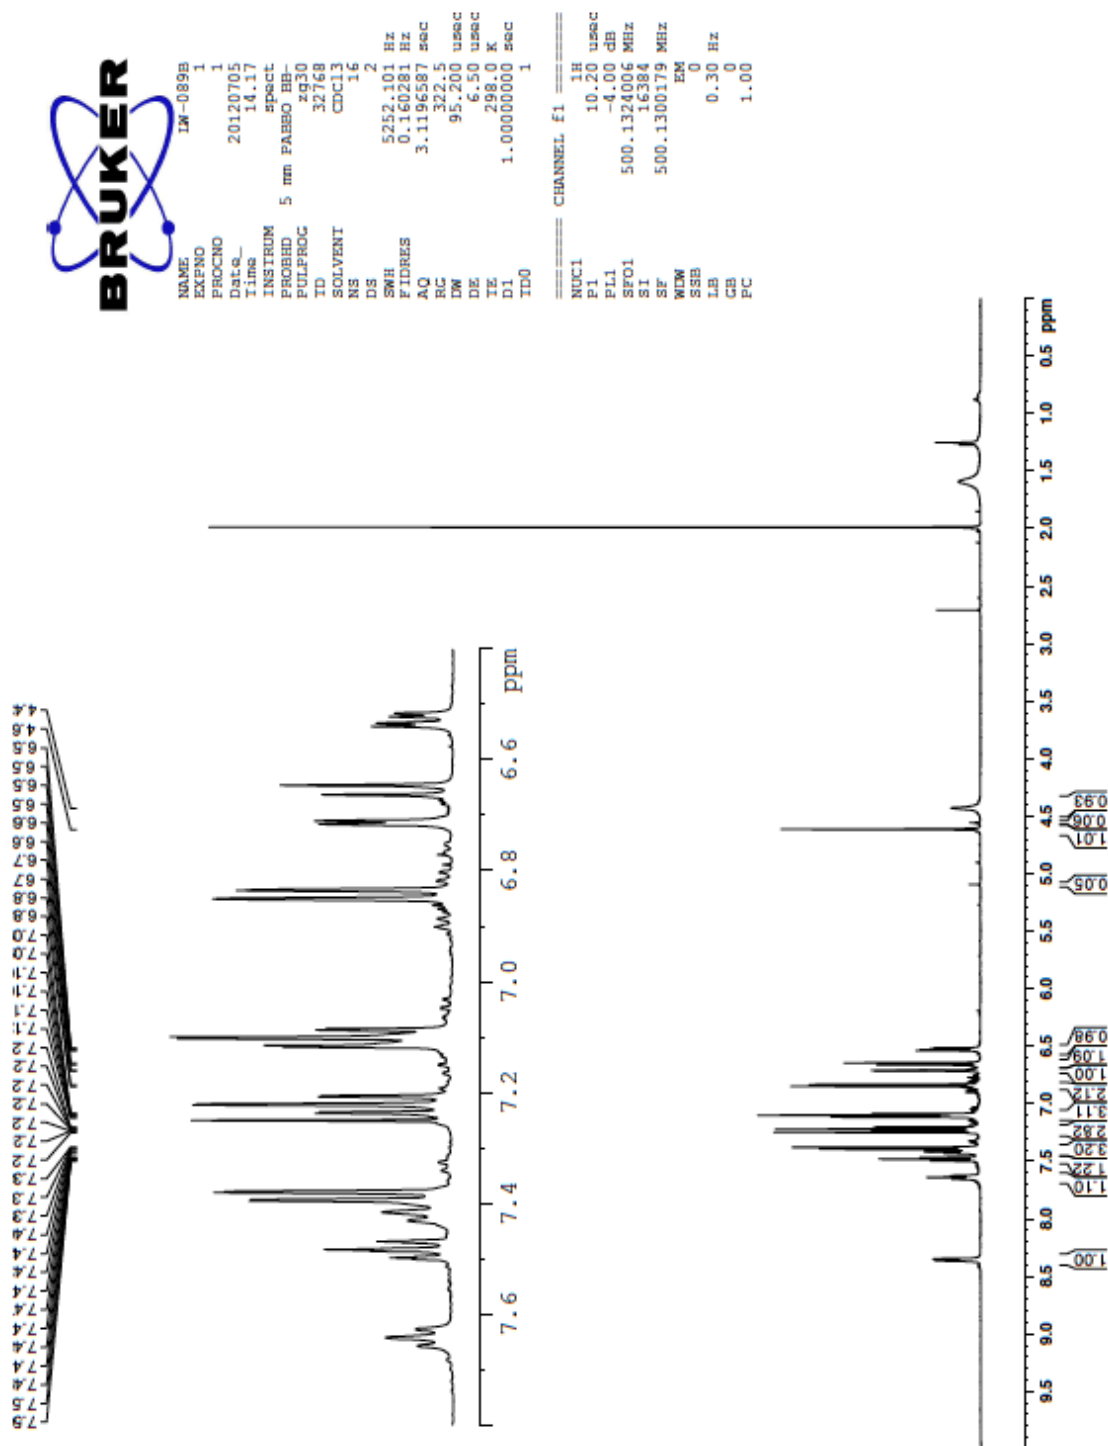



$^{13}\text{C}$  NMR (125 MHz,  $\text{CDCl}_3$ ) spectrum of **28**

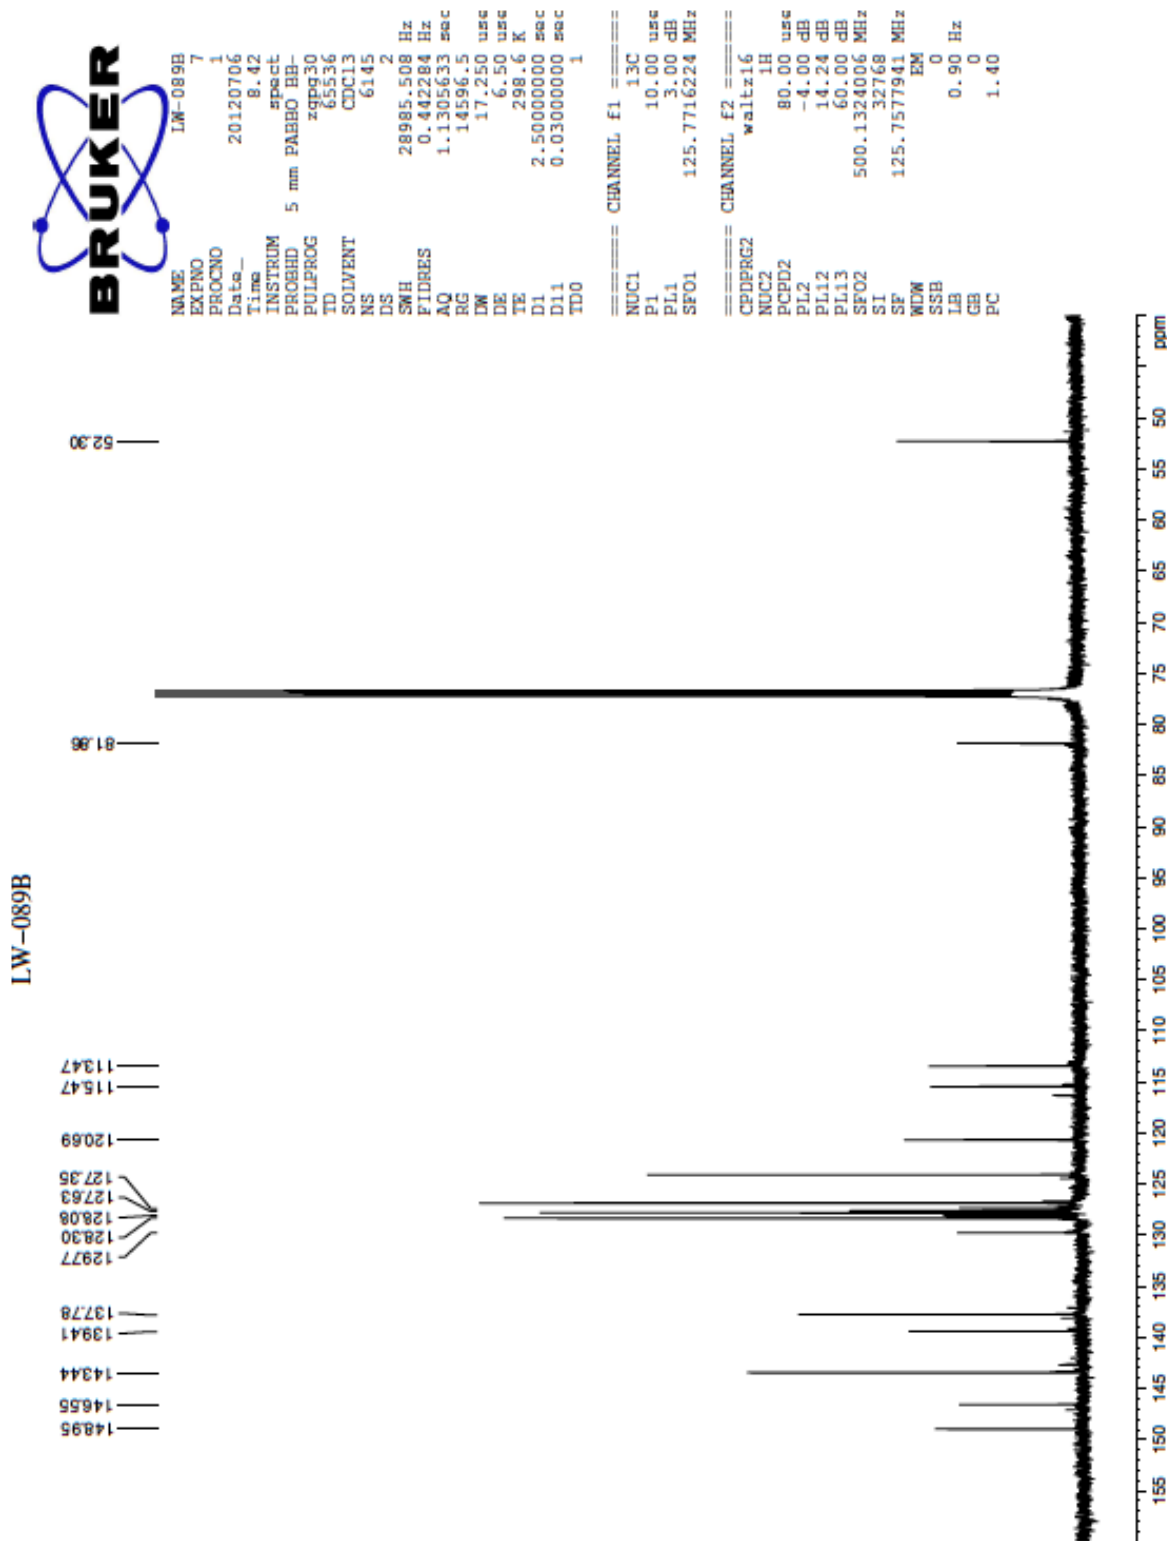

gCOSY spectrum of **28** in CDCl<sub>3</sub>

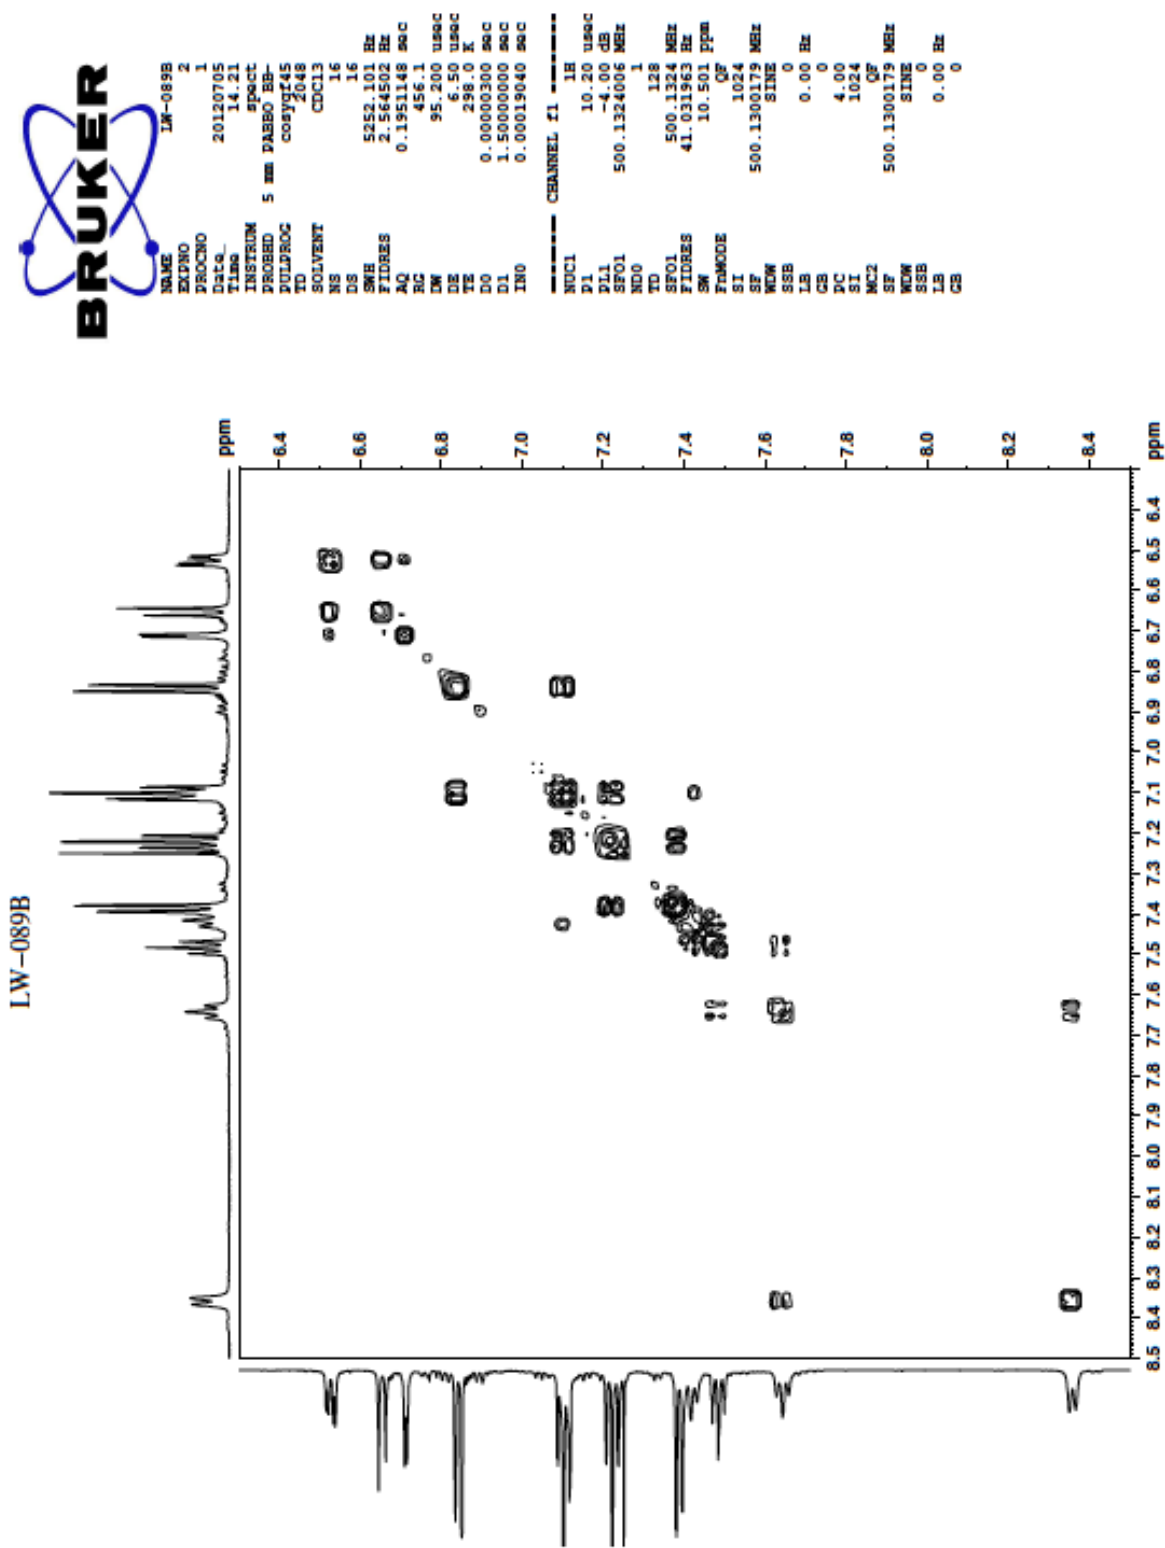

gHMBC spectrum of **28** in CDCl<sub>3</sub>

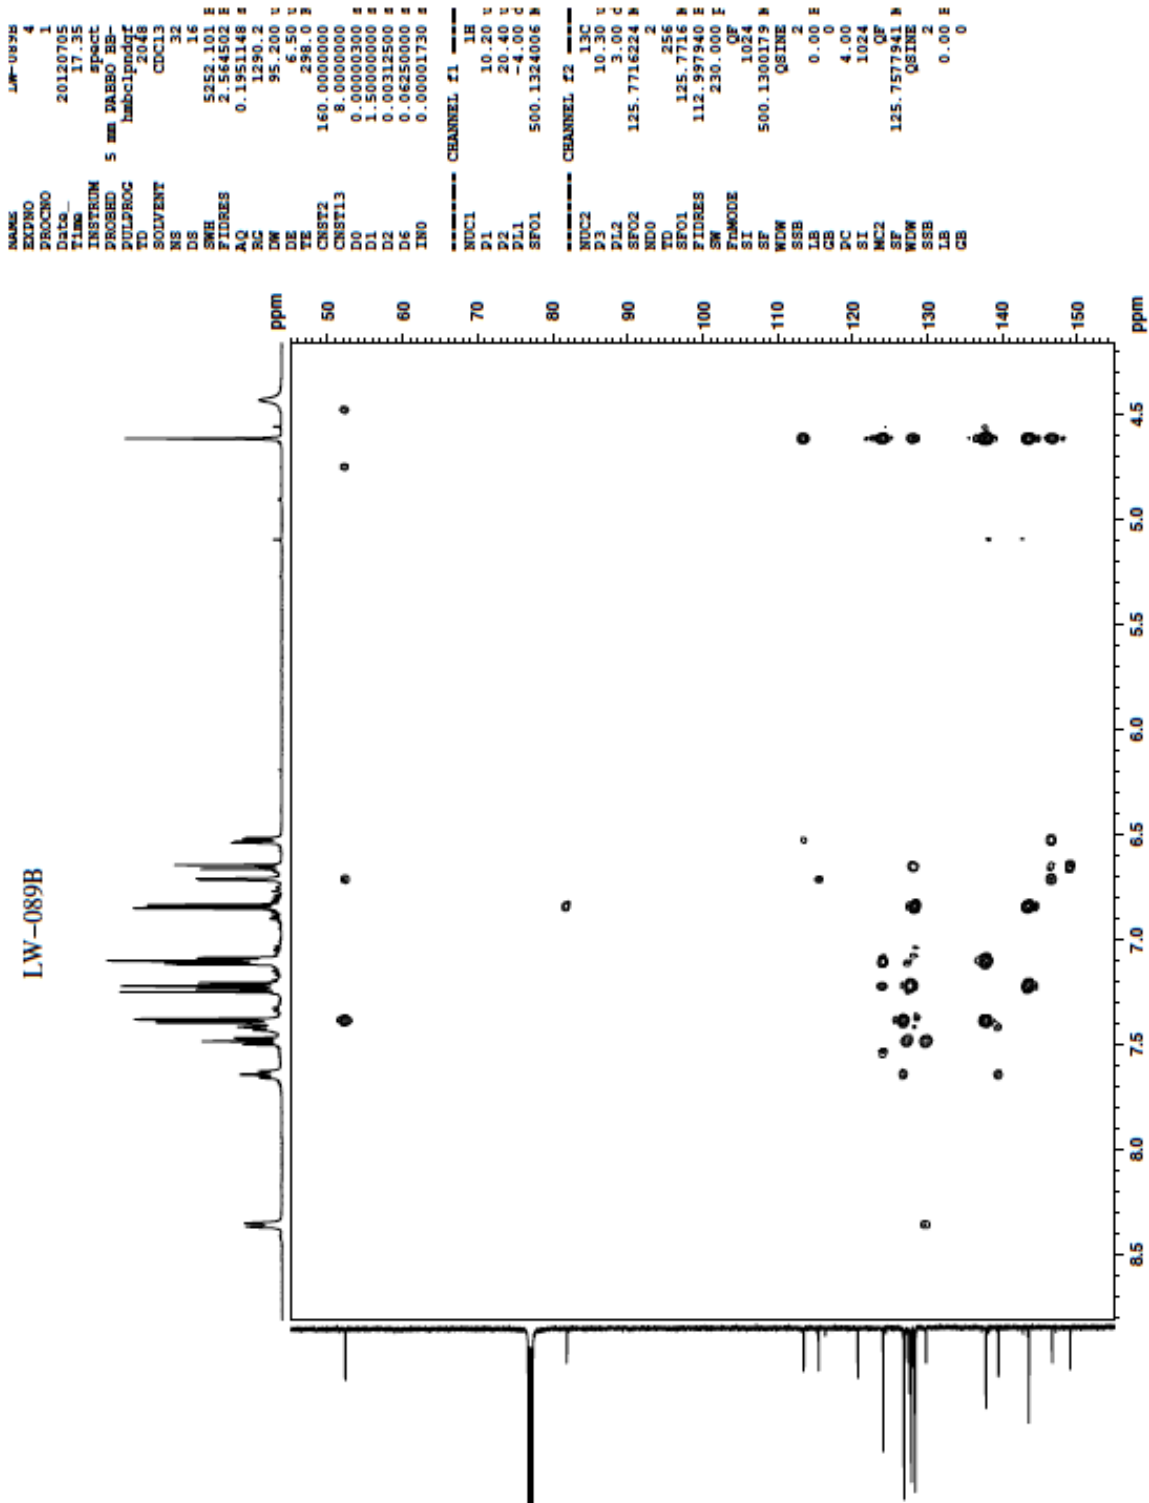

gHSQC spectrum of **28** in CDCl<sub>3</sub>

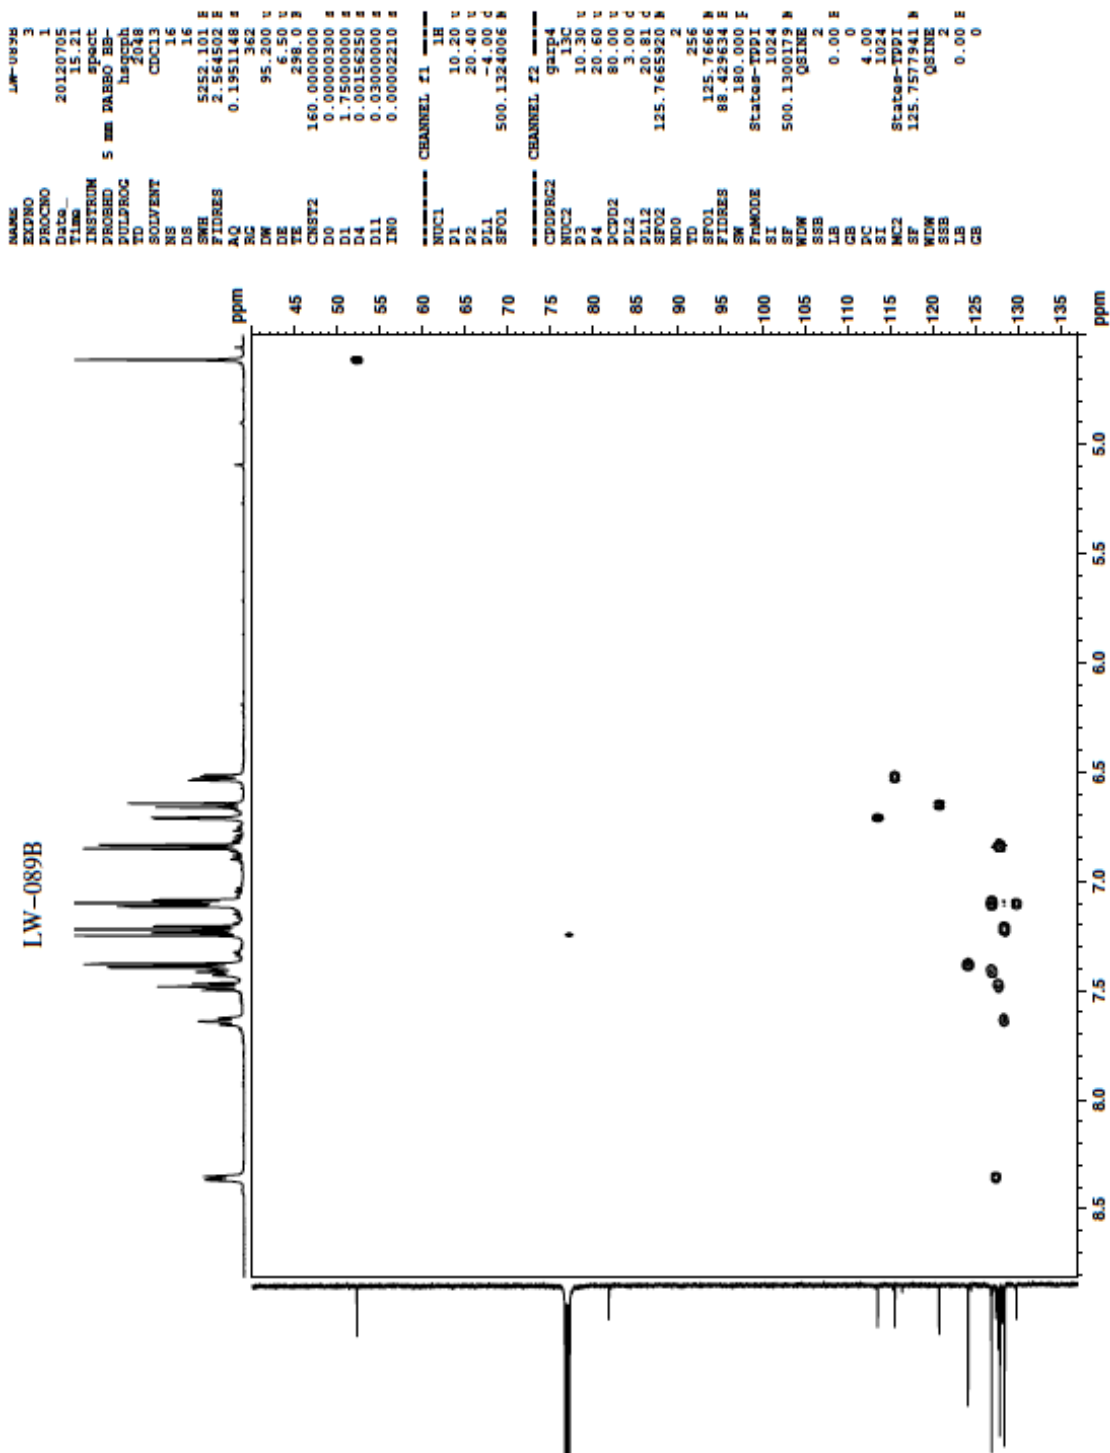

## 2. Irradiations of 9 – 11 in UV-Vis cuvettes

Absorption spectra of **9** in (a) CH<sub>3</sub>CN and (b) 1:1 = H<sub>2</sub>O :CH<sub>3</sub>CN after irradiation at 300 nm (photolysis in the UV-vis cuvette, 16 lamps, Rayonet reactor)

### (a) in CH<sub>3</sub>CN

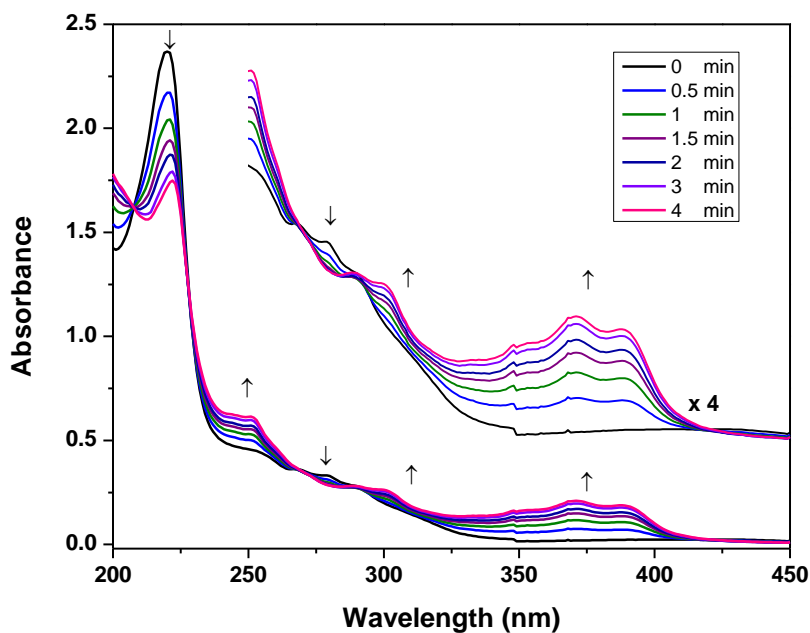

### (b) in 1:1 = H<sub>2</sub>O :CH<sub>3</sub>CN

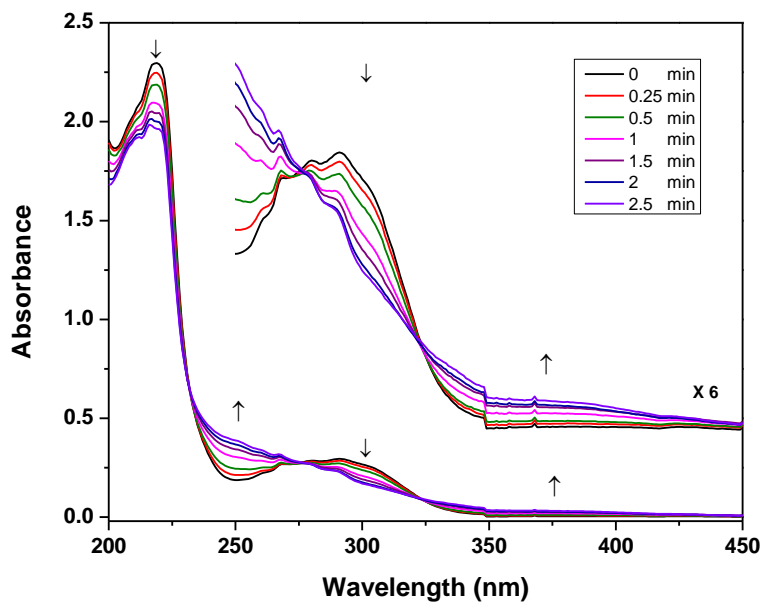

Absorption spectra of **10** in (a)  $\text{CH}_3\text{CN}$  and (b) 1:1 =  $\text{H}_2\text{O} : \text{CH}_3\text{CN}$  after irradiation at 300 nm  
(photolysis in the UV-vis cuvette, 16 lamps, Rayonet reactor)

(a) in  $\text{CH}_3\text{CN}$

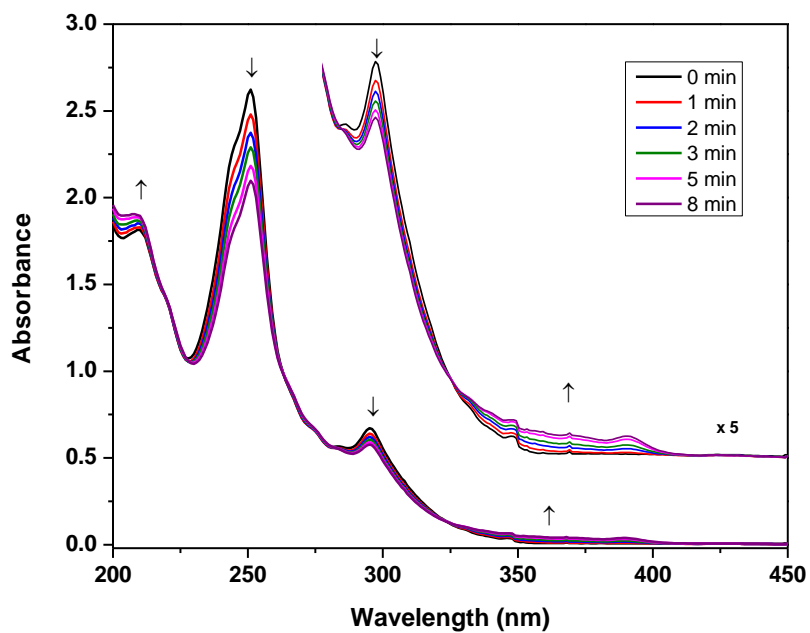

(b) in 1:1 =  $\text{H}_2\text{O} : \text{CH}_3\text{CN}$

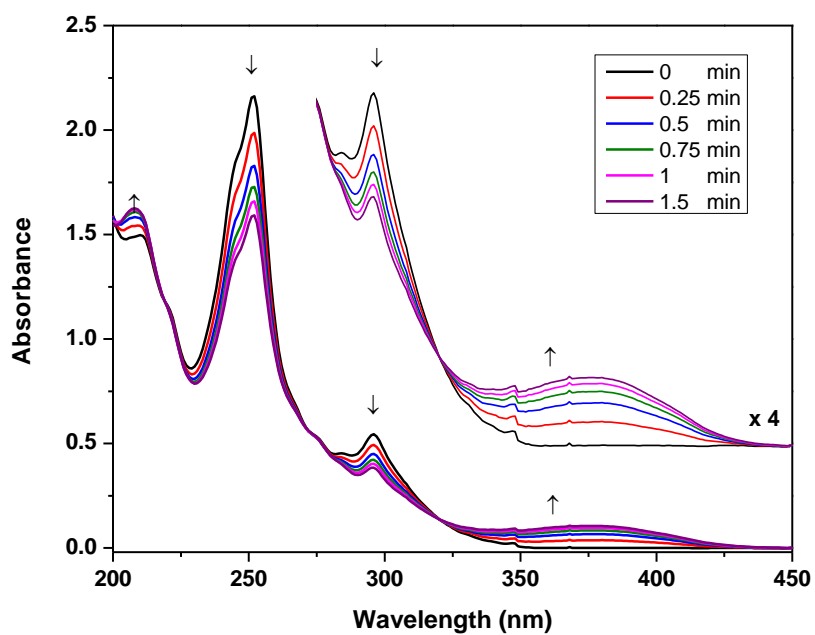

Absorption spectra of **11** in (a) CH<sub>3</sub>CN and (b) 1:1 = H<sub>2</sub>O :CH<sub>3</sub>CN (c) cyclohexane (d) diethyl ether (e) THF (f) methanol after irradiation at 350 nm (photolysis in the UV-vis cuvette, 16 lamps, Rayonet reactor)

**(a) in CH<sub>3</sub>CN**

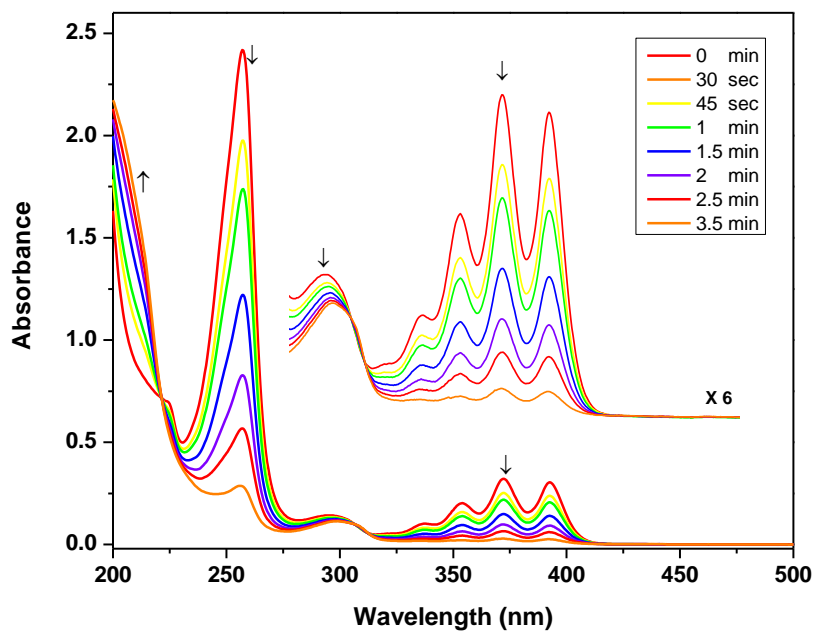

**(b) in 1:1 = H<sub>2</sub>O :CH<sub>3</sub>CN**

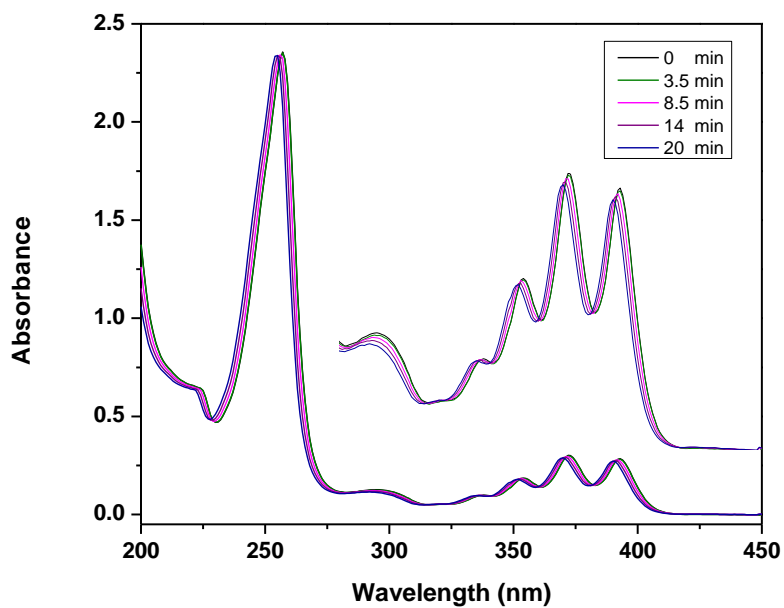

(c) in cyclohexane

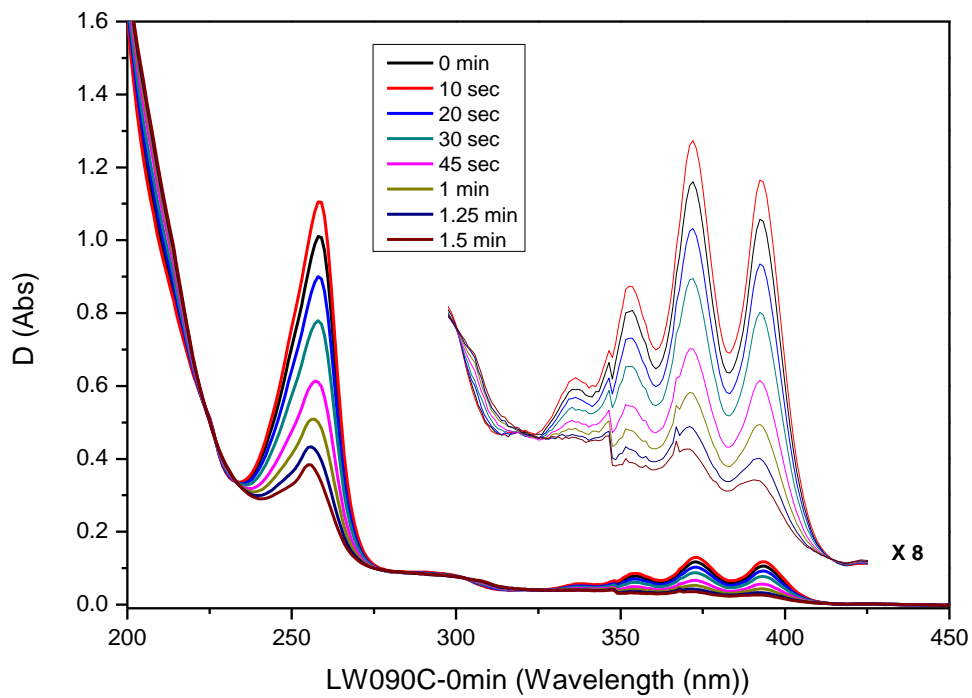

(d) in diethyl ether

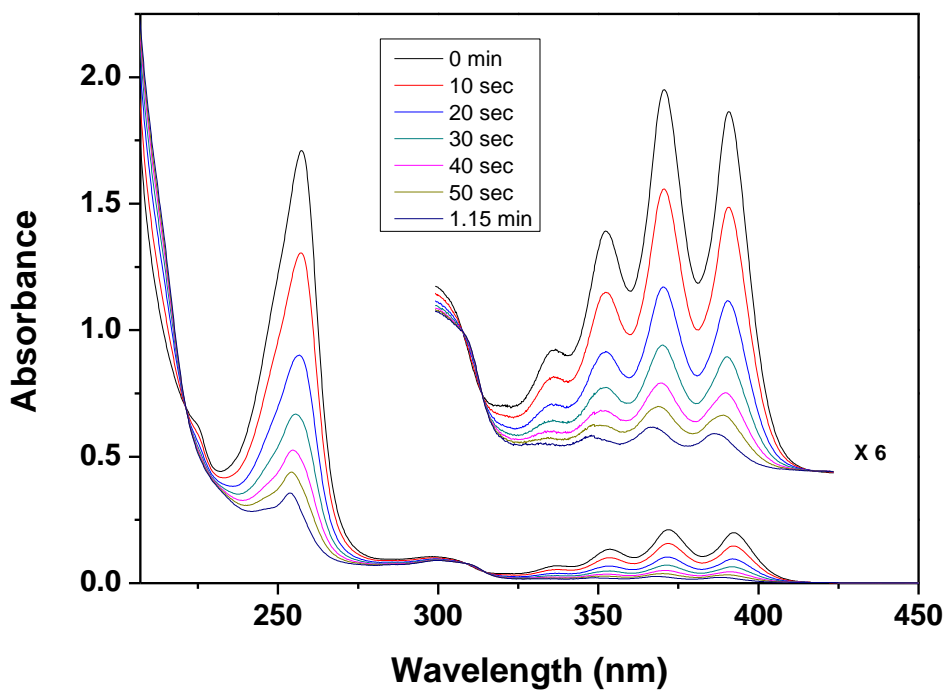



(e) in THF

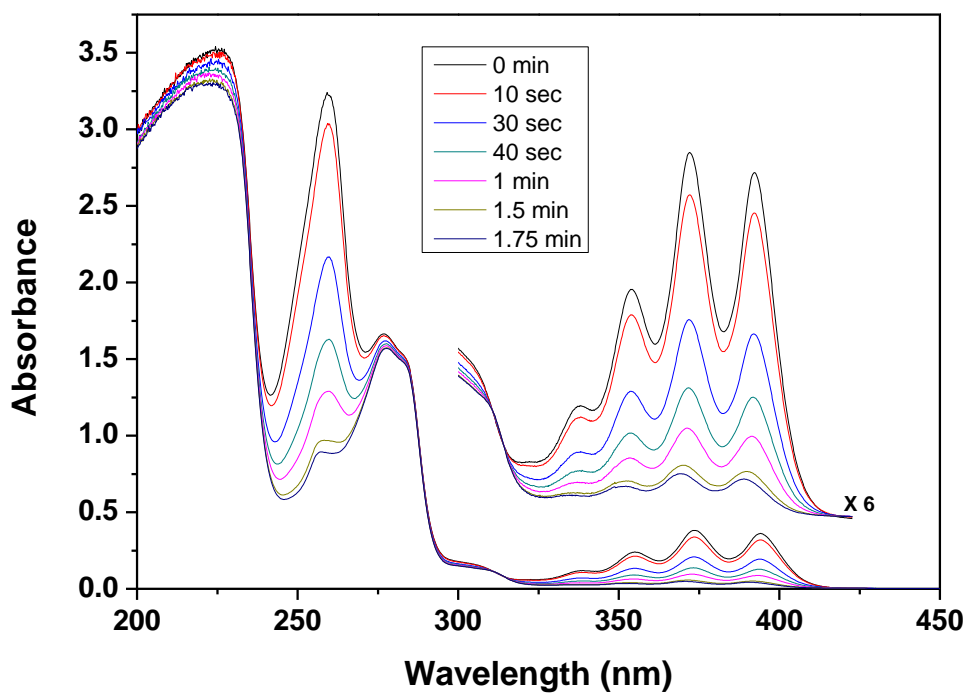

(f) in CH<sub>3</sub>OH

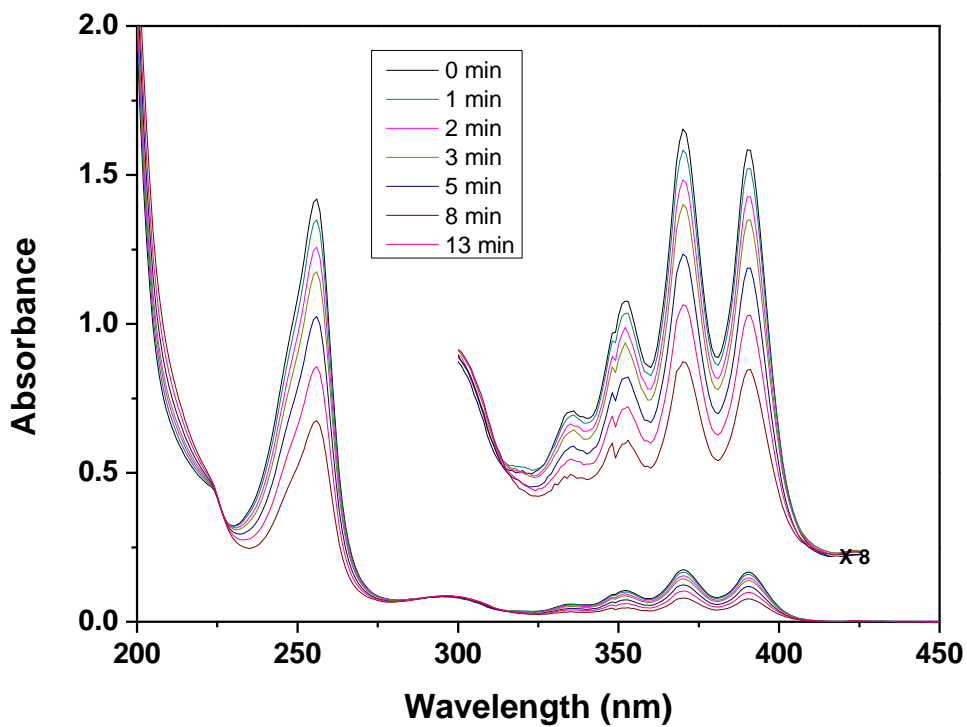

### 3. Fluorescence spectra of 9 –11 and 15 in various solvents

Excitation and emission spectra of 9 in (a) cyclohexane (b) diethyl ether (c) THF (d) CH<sub>3</sub>CN (e) CH<sub>3</sub>OH & isopropyl alcohol (IPA)

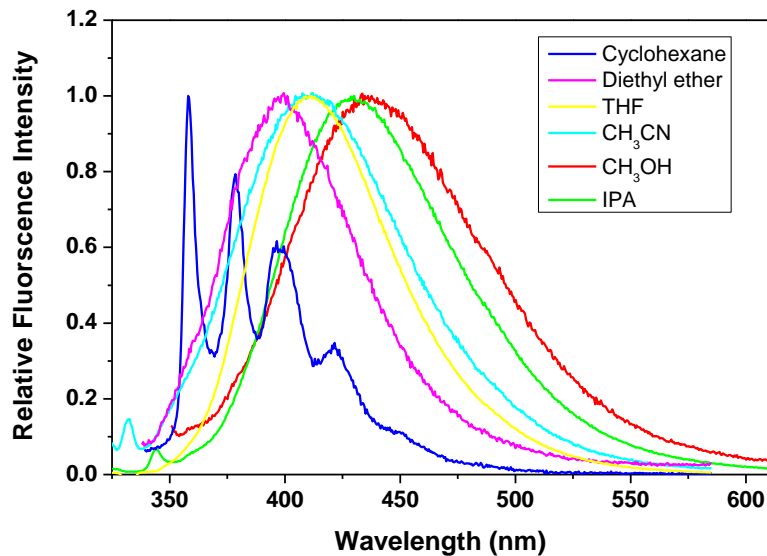

(a) in cyclohexane

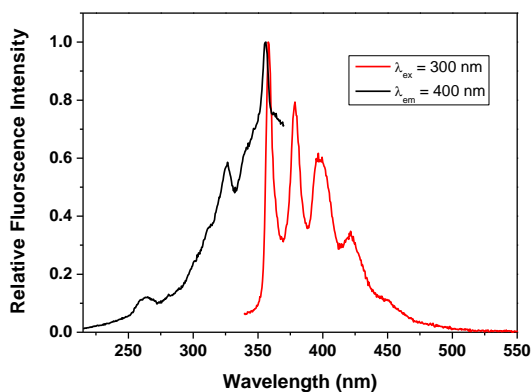

(b) in diethyl ether

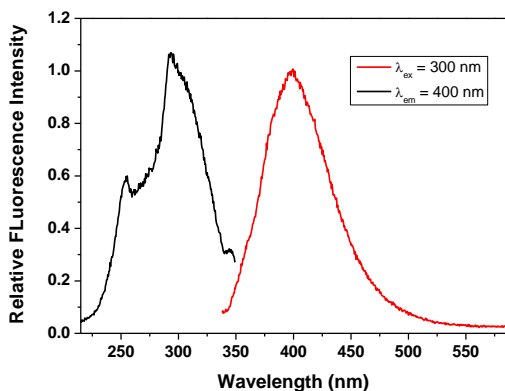

**(c) in THF**

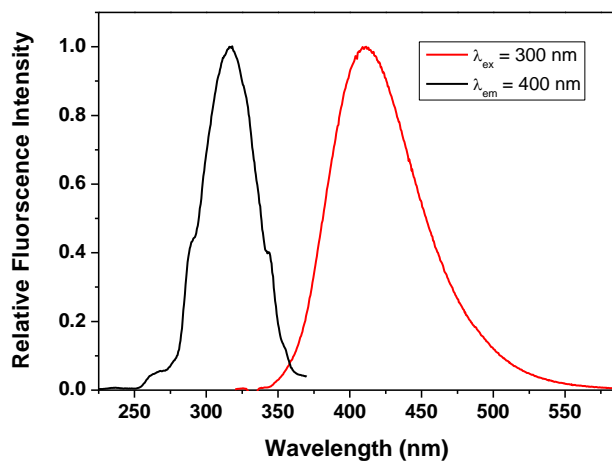

**(d) in  $\text{CH}_3\text{CN}$**

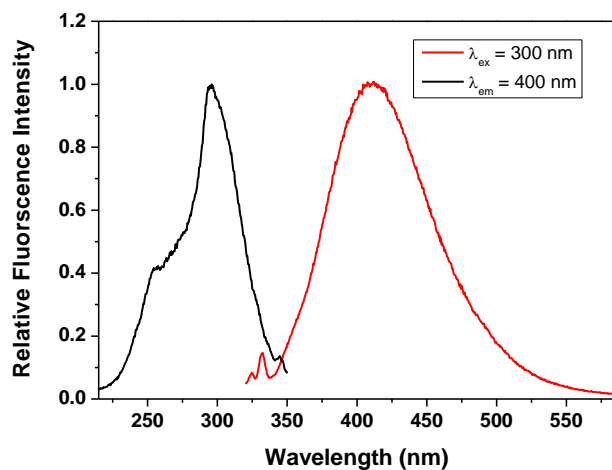

**(e) in  $\text{CH}_3\text{OH}$  & IPA**

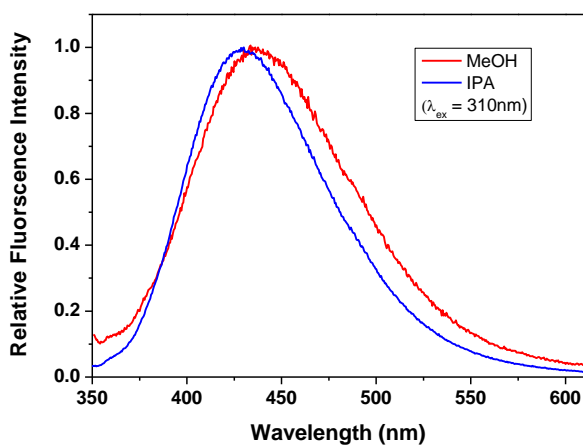

**Excitation and emission spectra of 10 in (a) cyclohexane (b) diethyl ether (c) THF (d) CH<sub>3</sub>CN (e) CH<sub>3</sub>OH (f) IPA**

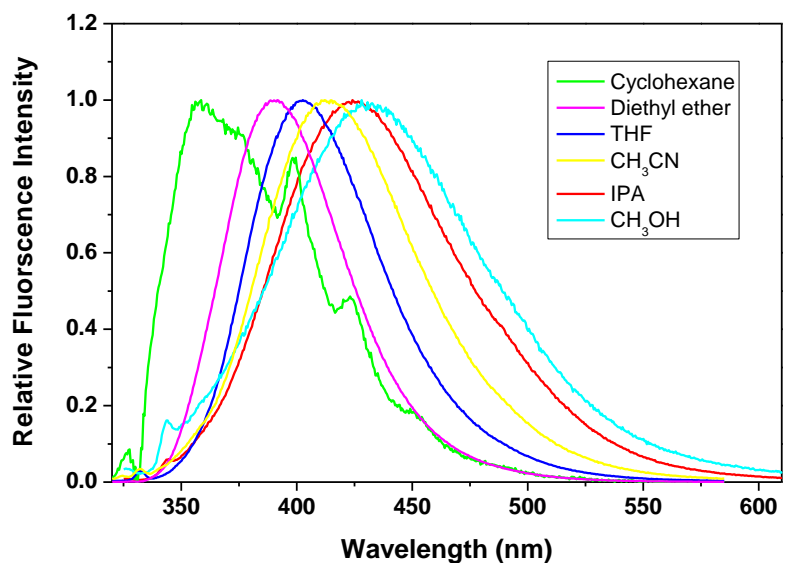

**(a) in cyclohexane**

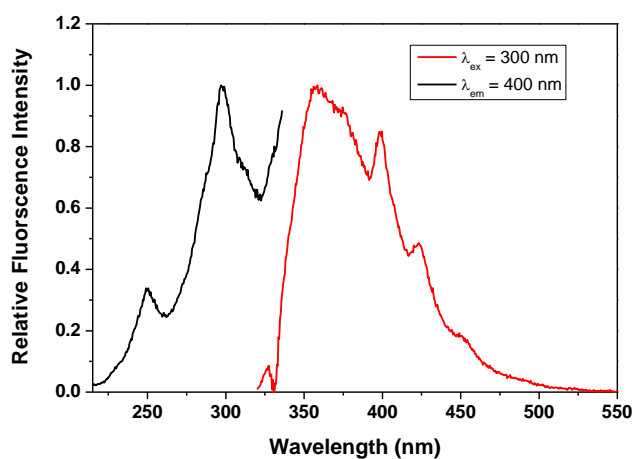

**(b) in diethyl ether**

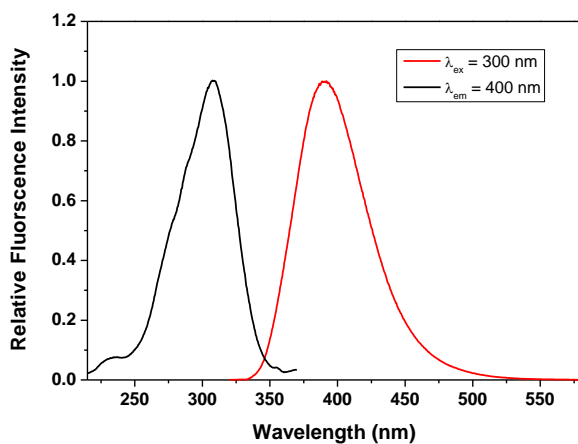

**(c) in THF**

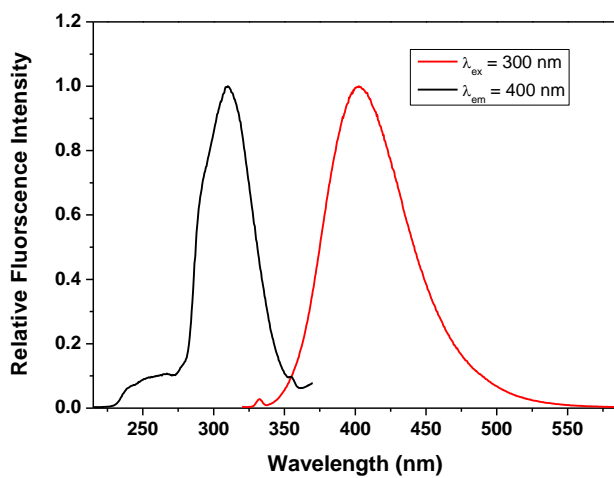

**(d) in CH<sub>3</sub>CN**

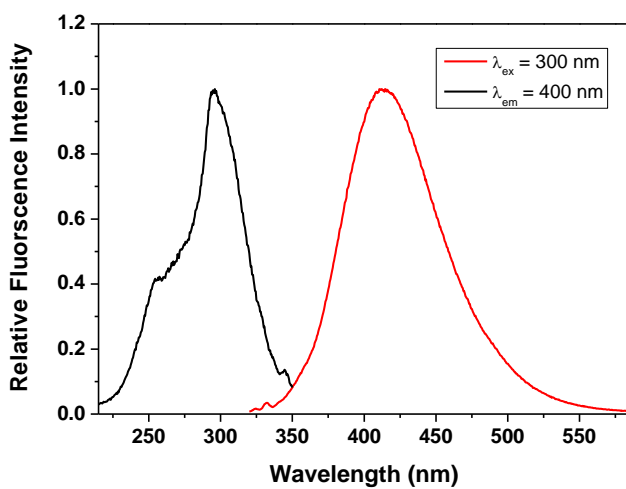

**(e) in CH<sub>3</sub>OH**

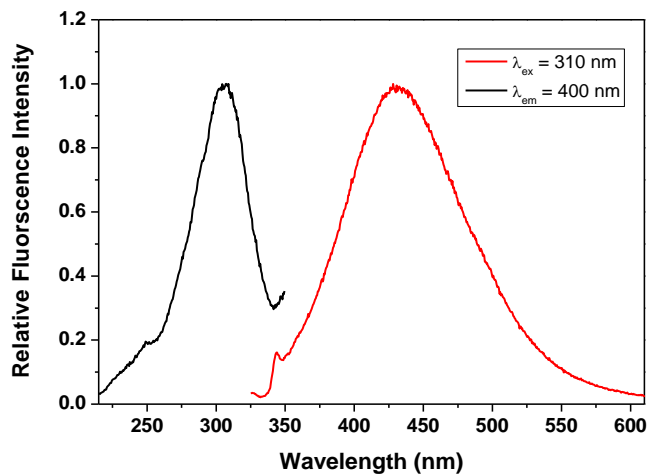

**(f) in IPA**

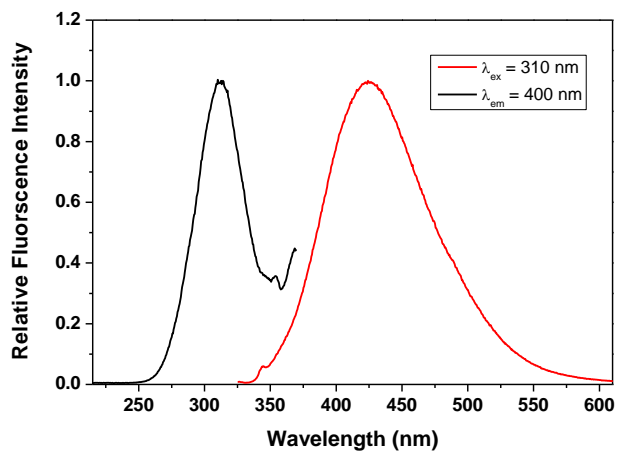

**Excitation and emission spectra of 11 in (a) cyclohexane (b) diethyl ether (c) THF (d) CH<sub>3</sub>CN (e) IPA (f) CH<sub>3</sub>OH**

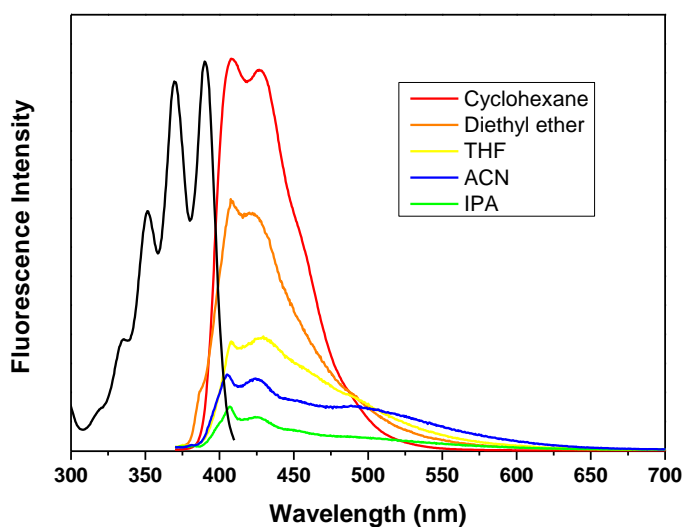

**(a) in cyclohexane**

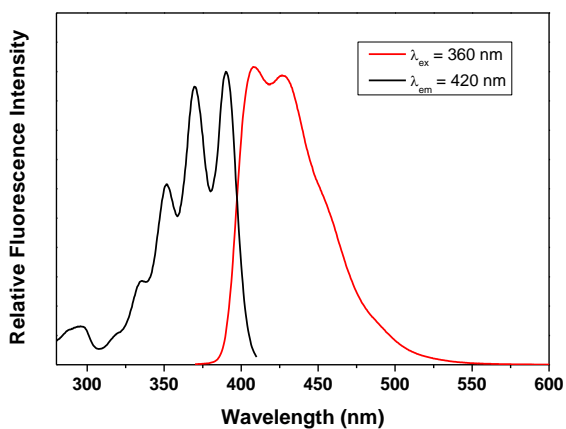

**(b) in diethyl ether**

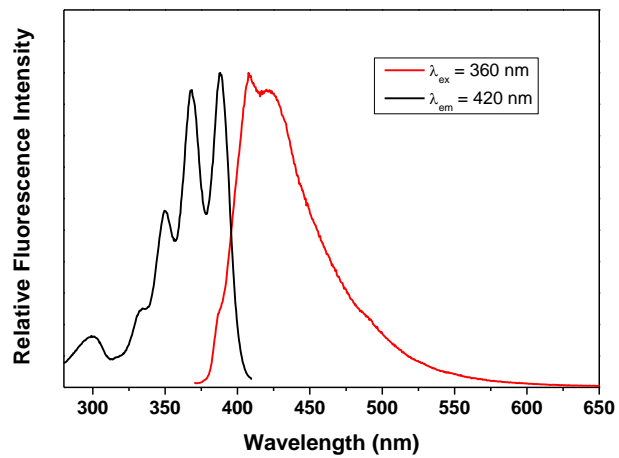

**(c) in THF**

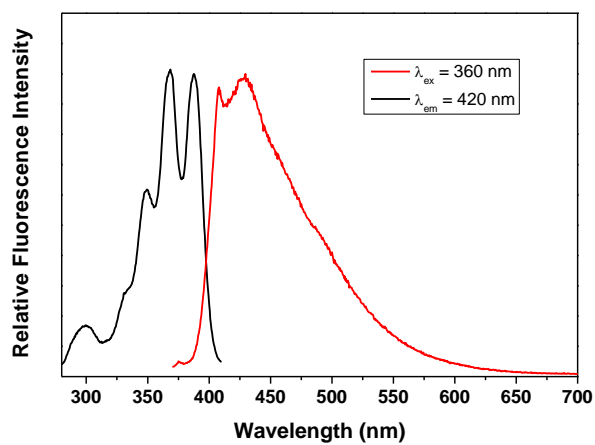

**(d) in  $\text{CH}_3\text{CN}$**

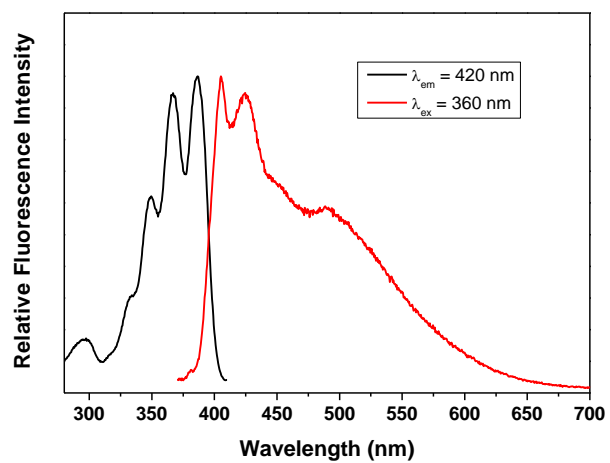

**(e) in IPA**

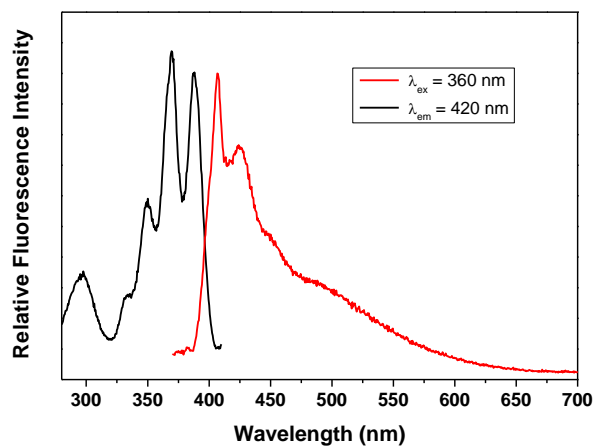

**(f) in CH<sub>3</sub>OH**

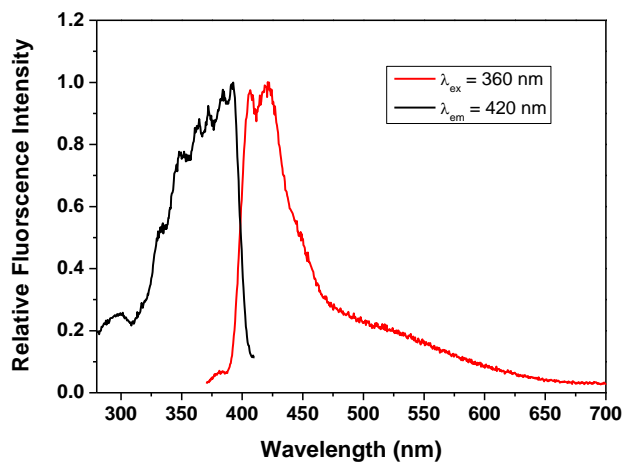

**Excitation and emission spectra of 15 in neat CH<sub>3</sub>CN**

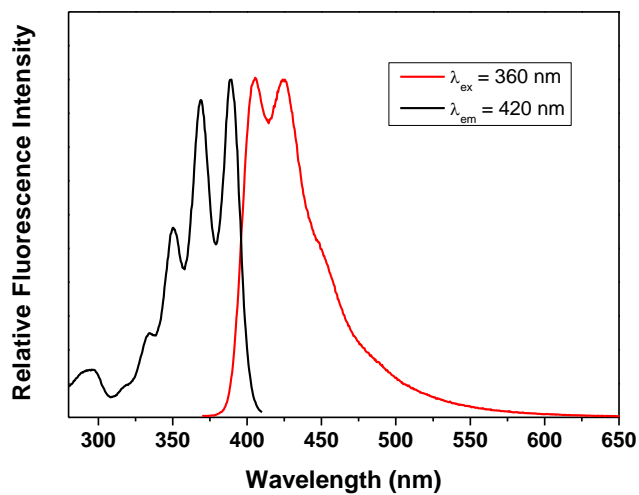



#### 4. Photophysical and Photochemical Parameters for 9 – 11 in various solvents

(a) Table 1. Compound 9 in various solvents

| Solvent            | $\lambda_{\text{abs}}/\text{nm}^a$ | $\lambda_{\text{em}}/\text{nm}^b$ | $\tau_f(\text{ns})^c$ | $\tau_f(\text{ns})^d$ |
|--------------------|------------------------------------|-----------------------------------|-----------------------|-----------------------|
| Cyclohexane        | 327 (sh), 356                      | 359, 380, 399,<br>424, 450 (sh)   | 0.88 (33%),           | 0.05 (10%)            |
|                    |                                    |                                   | 3.3 (13%),            | 2.1 (6%)              |
|                    |                                    |                                   | 13.8 (54%)            | 14.8 (84%)            |
| Diethyl ether      | 254 (sh), 295                      | 399                               | 0.15 (80%),           | 0.19 (90%)            |
|                    |                                    |                                   | 0.95 (16%),           | 1.5 (10%)             |
|                    |                                    |                                   | 4.7 (4%)              |                       |
| THF                | 318                                | 413                               | 0.24 (26%),           | 0.23 (21%)            |
|                    |                                    |                                   | 0.87 (71%),           | 0.94 (79%)            |
|                    |                                    |                                   | 4.4 (3%)              |                       |
| CH <sub>3</sub> OH | 320                                | 427                               | 0.29 (18%),           | 0.6 (88%)             |
|                    |                                    |                                   | 0.89 (37%),           | 3.8 (12%)             |
|                    |                                    |                                   | 5.4 (45%)             |                       |
| IPA                | 321                                | 439                               | 0.06 (17%),           | 0.9 (91%)             |
|                    |                                    |                                   | 1.1 (70%),            | 2.5 (9%)              |
|                    |                                    |                                   | 5.3 (13%)             |                       |

<sup>a</sup> Maxima in the absorption spectra. <sup>b</sup> Maxima in the emission spectra. <sup>c</sup> Fluorescence lifetimes measured at  $\lambda_{\text{em}} = 400$  nm by time correlated single photon counting (SPC). Estimated error is  $\pm 0.1$  ns. <sup>d</sup> Fluorescence lifetimes measured at  $\lambda_{\text{em}} = 450$  nm except for cyclohexane at  $\lambda_{\text{em}} = 360$  nm.

(b) Table 2. Compound 10 in various solvents

| Solvent            | $\lambda_{\text{abs}}/\text{nm}^a$ | $\lambda_{\text{em}}/\text{nm}^b$ | $\tau_f(\text{ns})^c$   |
|--------------------|------------------------------------|-----------------------------------|-------------------------|
| Cyclohexane        | 248 (sh), 298                      | 357, 401, 426,<br>453 (sh)        | - <sup>d</sup>          |
| Diethyl ether      | 311                                | 392                               | 2.5 (100%)              |
| THF                | 311                                | 405                               | 1.6 (85%),<br>3.5 (15%) |
| CH <sub>3</sub> OH | 308                                | 432                               | - <sup>d</sup>          |
| IPA                | 313                                | 426                               | 1.2 (100%)              |

<sup>a</sup> Maxima in the absorption spectra. <sup>b</sup> Maxima in the emission spectra. <sup>c</sup> Fluorescence lifetimes measured at  $\lambda_{\text{em}} = 400$  nm by time correlated single photon counting (SPC). Estimated error is  $\pm 0.1$  ns. <sup>d</sup> Fluorescence is too weak for decay lifetimes to be detected.

(c) **Table 3.** Compound **11** in various solvents

| <b>Solvent</b>       | $\lambda_{\text{abs}}/\text{nm}^a$ | $\lambda_{\text{em}}/\text{nm}^b$ | $\Phi_f^c$  | $\tau_f(\text{ns})^d$                 | $\tau_f(\text{ns})^e$   |
|----------------------|------------------------------------|-----------------------------------|-------------|---------------------------------------|-------------------------|
| <b>cyclohexane</b>   | 335 (sh), 352,<br>370, 390         | 409, 429, 454<br>(sh)             | 0.245±0.02  | 0.17 (4%),<br>2.2 (96%)               | 2.2 (100%)              |
| <b>Diethyl ether</b> | 335 (sh), 351,<br>368, 389         | 409, 425, 490<br>(sh)             | 0.037±0.002 | 0.30 (48%),<br>5.0 (52%)              | 0.46 (90%)<br>4.0 (10%) |
| <b>THF</b>           | 333 (sh), 351,<br>367, 389         | 409, 431, 500<br>(sh)             | 0.009±0.003 | 0.56 (19%),<br>1.9 (19%),<br>13 (62%) | 0.95 (95%)<br>8.8 (5%)  |

<sup>a</sup> Maxima in the absorption spectra. <sup>b</sup> Maxima in the emission spectra. <sup>c</sup> Fluorescence quantum yield measured by using quinine bisulfate ( $\Phi = 0.55$ ) in 0.1 N H<sub>2</sub>SO<sub>4</sub>. <sup>d</sup> Fluorescence lifetimes measured at  $\lambda_{\text{em}} = 400$  nm by time correlated single photon counting (SPC). Estimated error is ±0.1 ns. <sup>e</sup> Fluorescence lifetimes measured at  $\lambda_{\text{em}} = 500$  nm.

## 5. Fluorescence decay profiles of 9 (a), 10 (b), and 11 (c) and 15 (d) in CH<sub>3</sub>CN

### (a) Compound 9 at $\lambda_{em} = 400$ nm

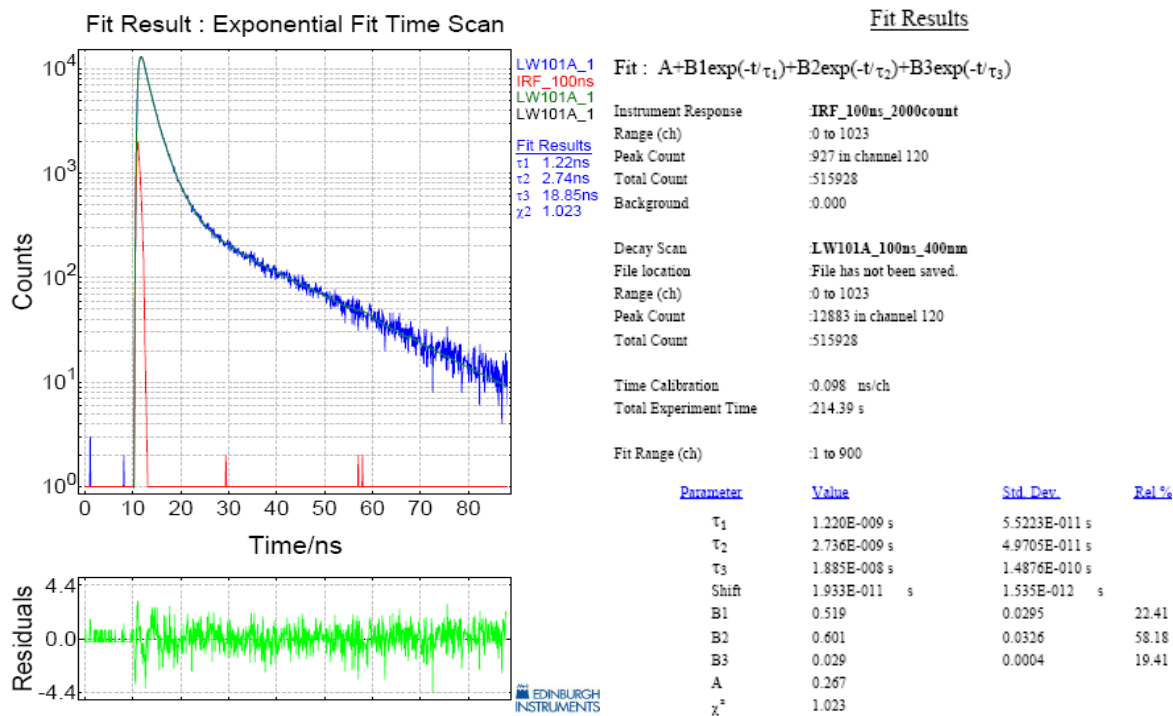

### (b) Compound 10 at $\lambda_{em} = 400$ nm

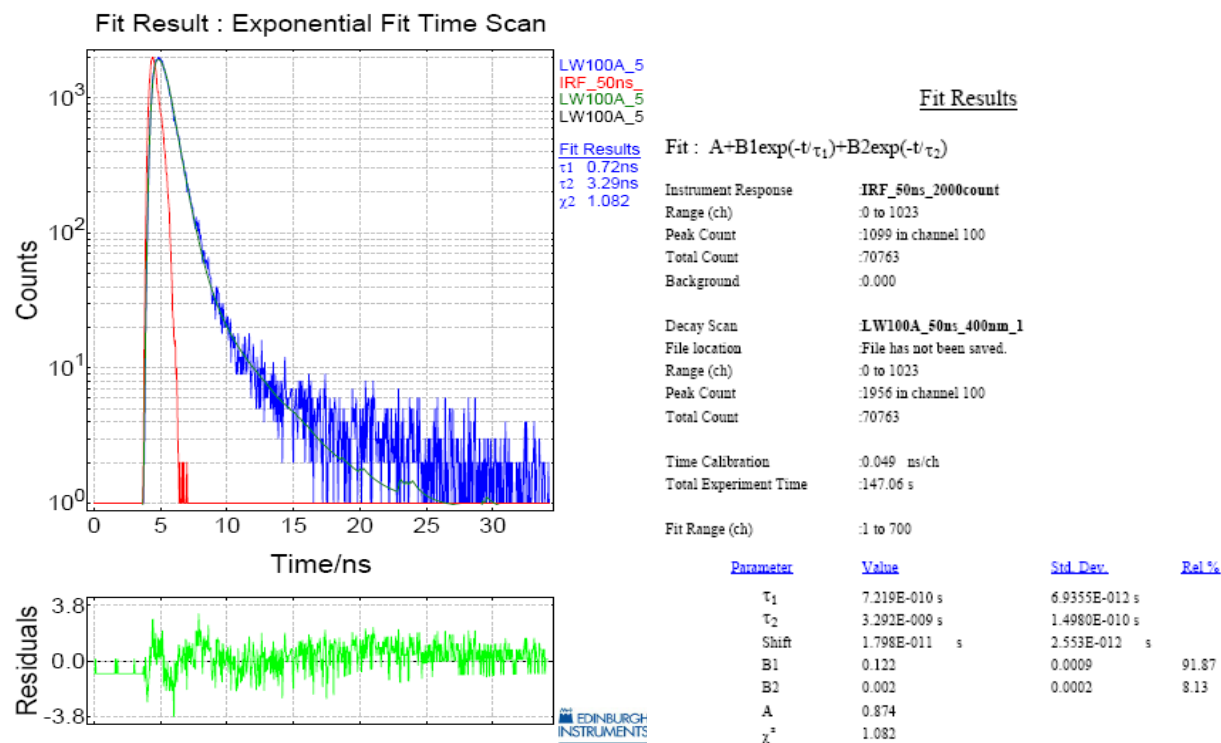

(c) Compound 11 at  $\lambda_{em} = 400$  nm

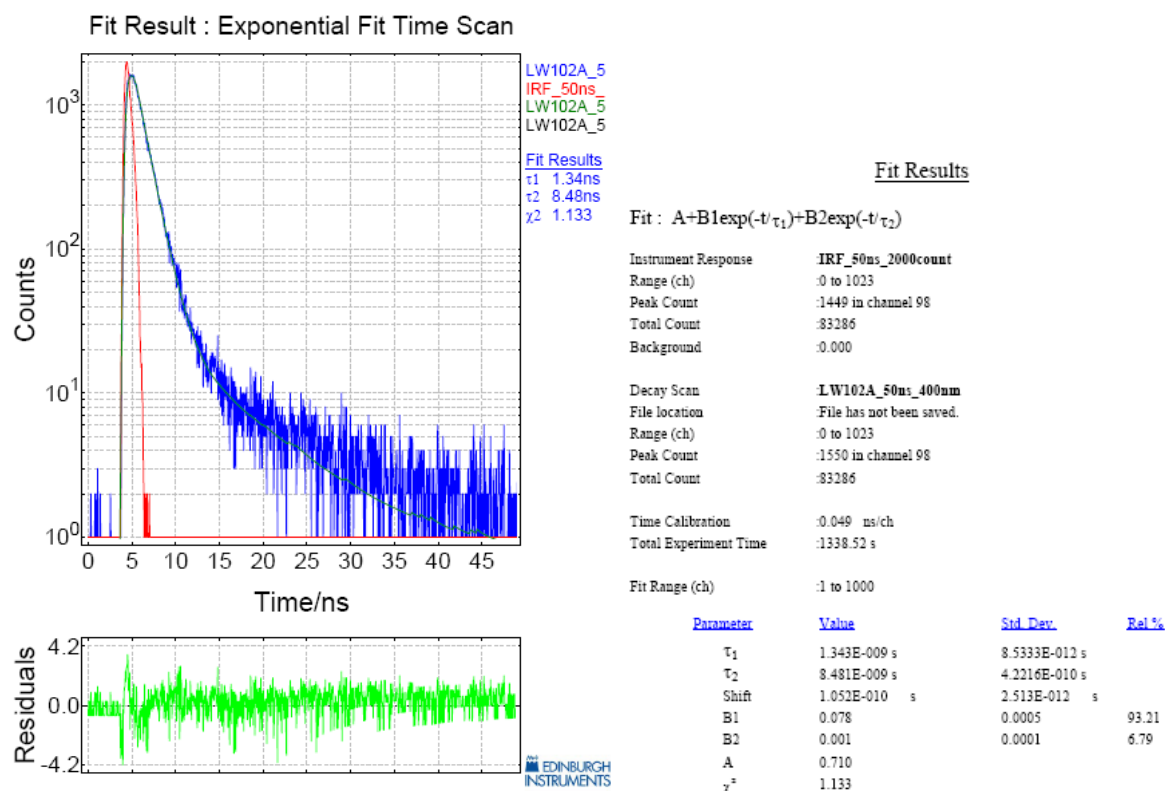

(d) Compound 15 at  $\lambda_{em} = 400$  nm

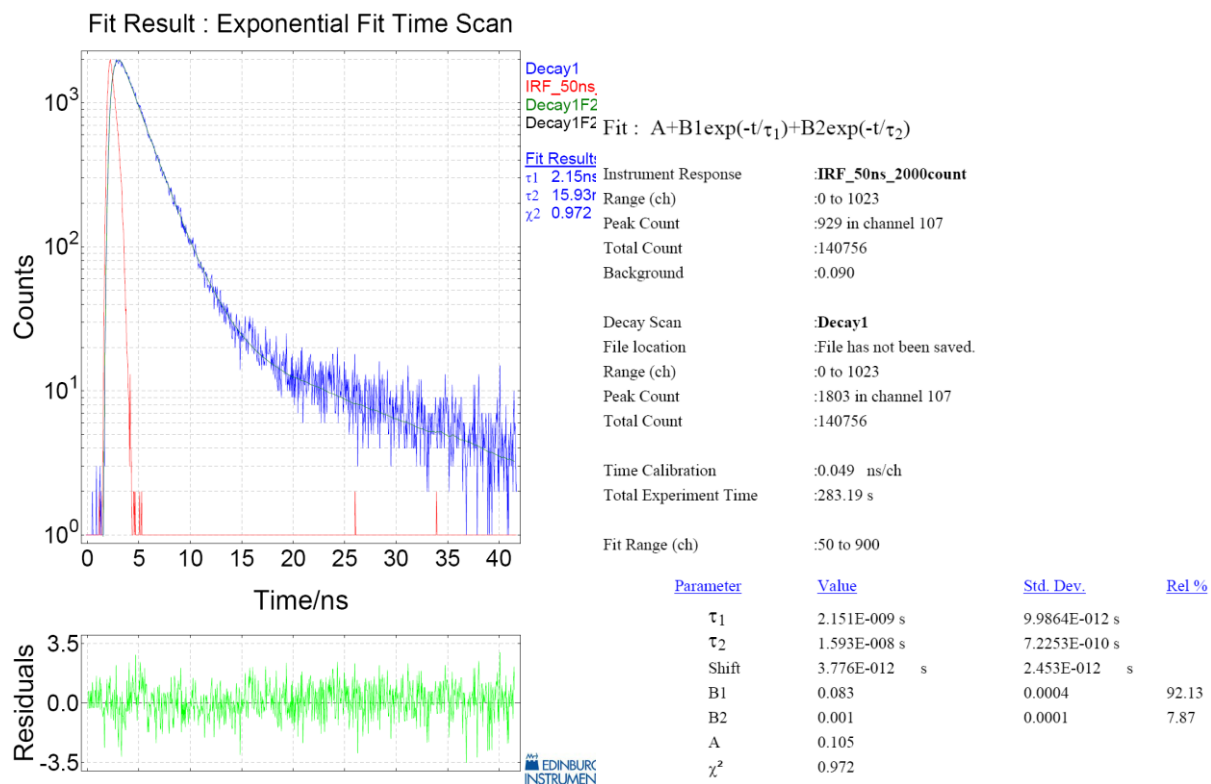

## 6. Laser Flash Photolysis of 9-11, 13 and 15

### (a) Transient absorption spectra observed for 9 in CH<sub>3</sub>CN solution

#### (i) N<sub>2</sub> purged

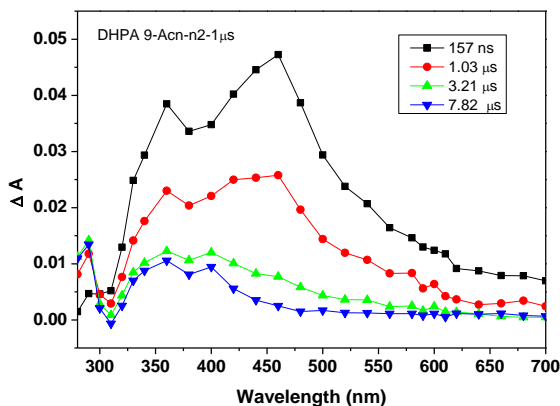

#### (ii) O<sub>2</sub> purged

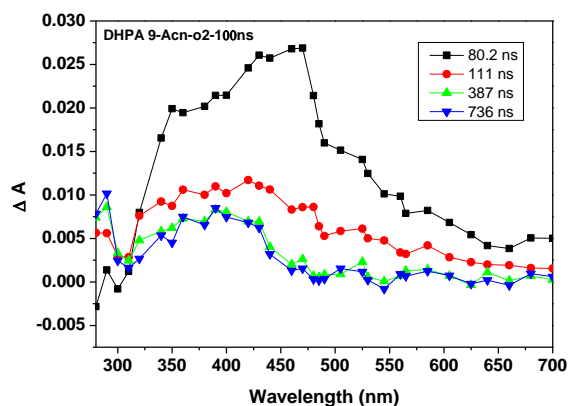

### (b) Transient absorption spectra observed for 9 in 10% H<sub>2</sub>O/CH<sub>3</sub>CN

#### (i) N<sub>2</sub> purged

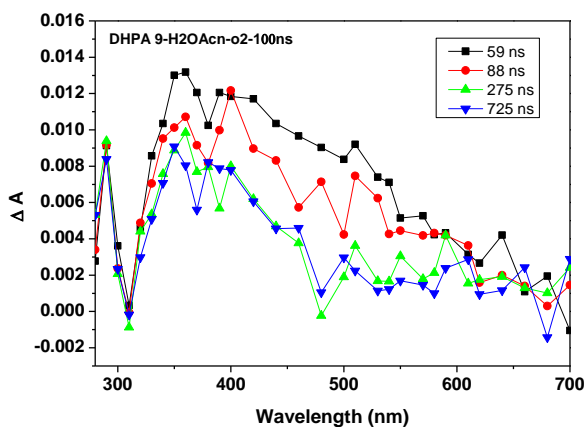

#### (ii) O<sub>2</sub> purged

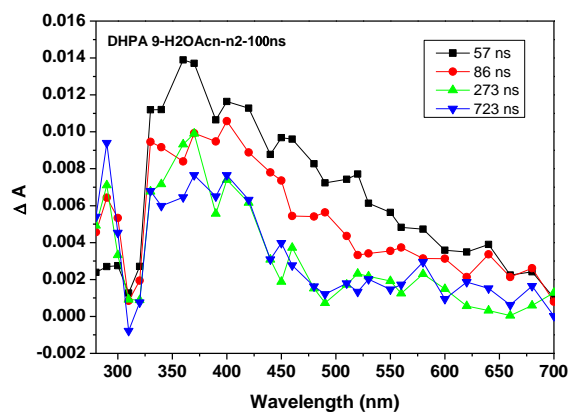

### (c) Transient absorption spectra observed for 10 in CH<sub>3</sub>CN solution

#### (i) N<sub>2</sub> purged

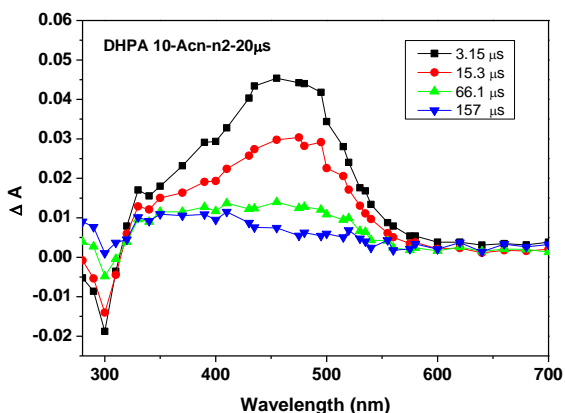

#### (ii) O<sub>2</sub> purged

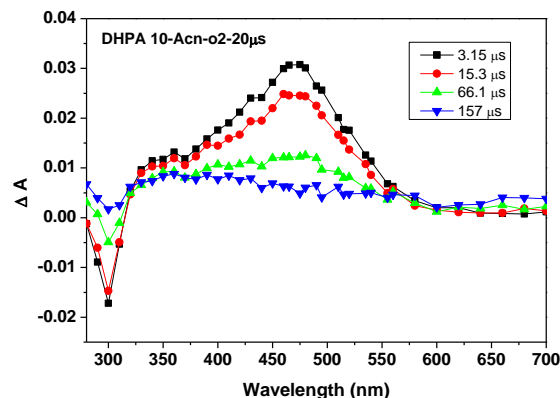

(d) Transient absorption spectra observed for 10 in 50% H<sub>2</sub>O/CH<sub>3</sub>CN

(i) N<sub>2</sub> purged

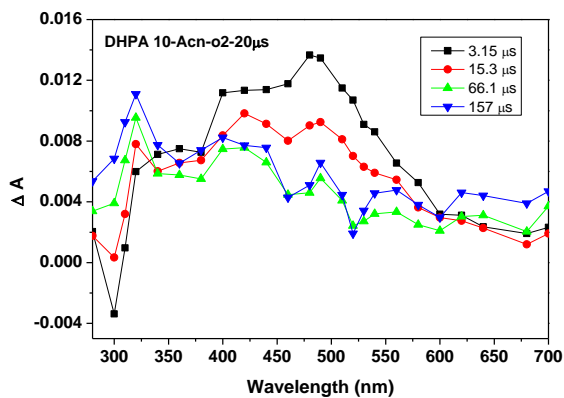

(ii) O<sub>2</sub> purged

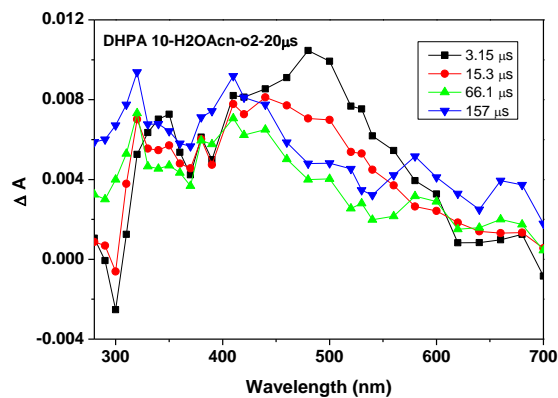

(e) Transient absorption spectra observed for 13 in CH<sub>3</sub>CN

(i) N<sub>2</sub> purged

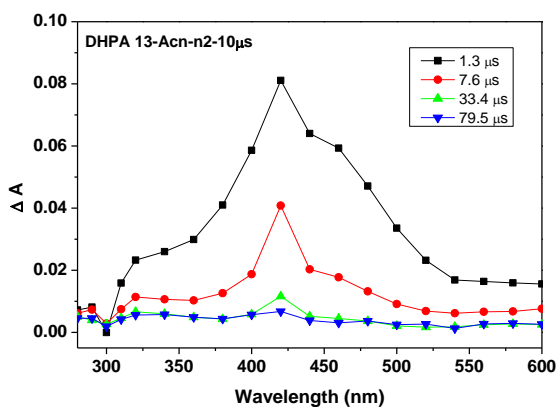

(ii) O<sub>2</sub> purged

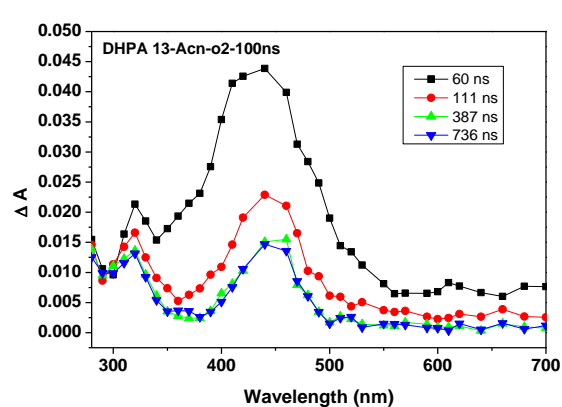

(f) Transient absorption spectra observed for 11 in CH<sub>3</sub>CN

(i) N<sub>2</sub> purged

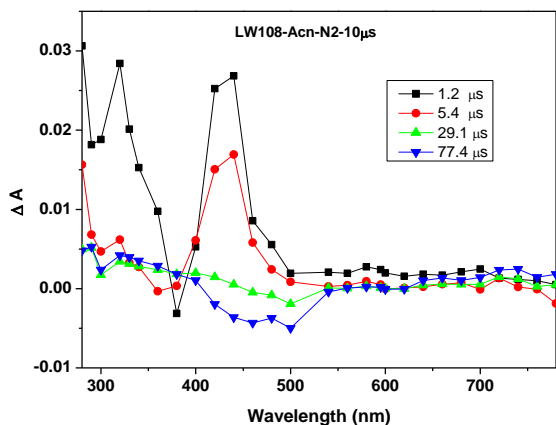

(ii) O<sub>2</sub> purged

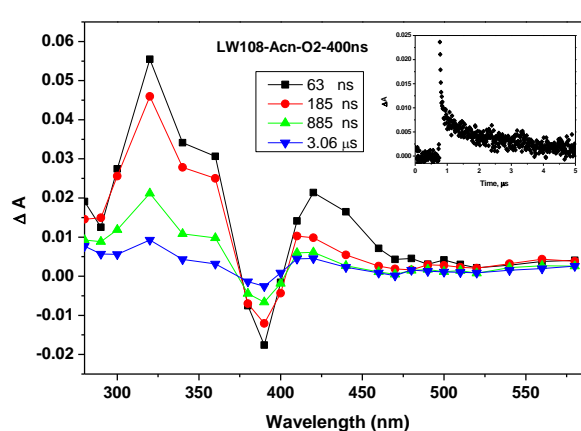

**(g) Transient absorption spectra observed for 11 in O<sub>2</sub> purged**

**(i) 50% H<sub>2</sub>O/CH<sub>3</sub>CN**

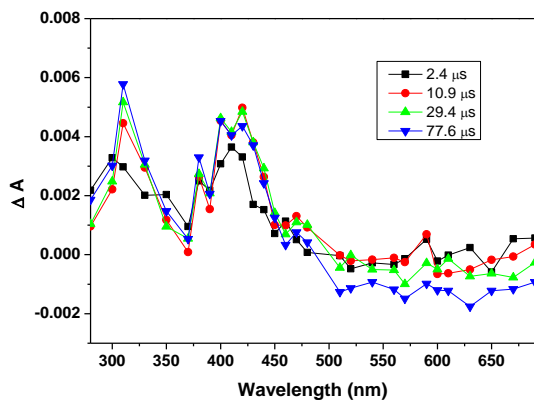

**(ii) TFE**

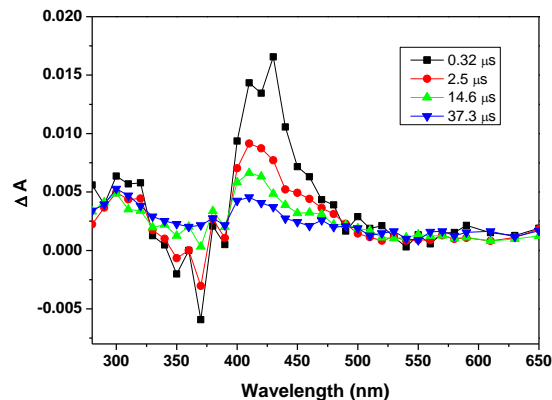

Decay lifetime observed at 420 nm in TFE: 15  $\mu$ s (left) and 57 ns (right)

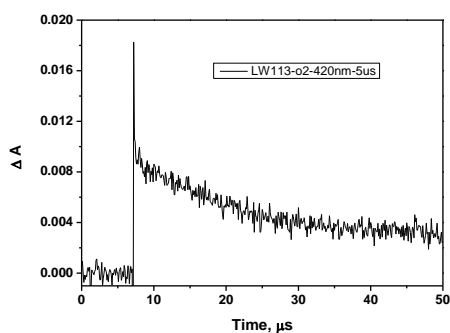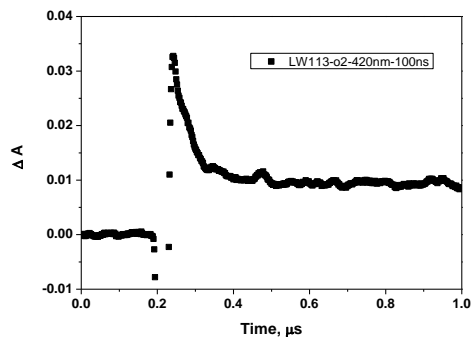

**(h) Transient absorption spectra observed for 15 in CH<sub>3</sub>CN solution**

**(i) N<sub>2</sub> purged**

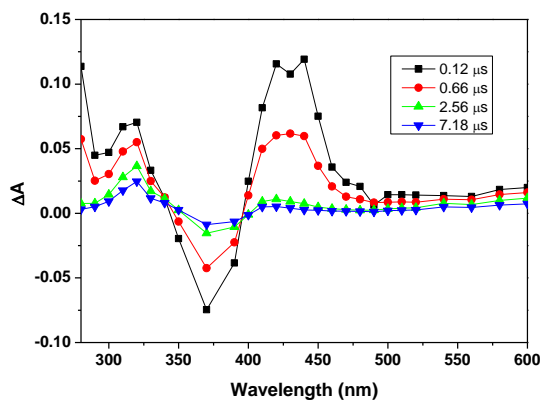

**(ii) O<sub>2</sub> purged**

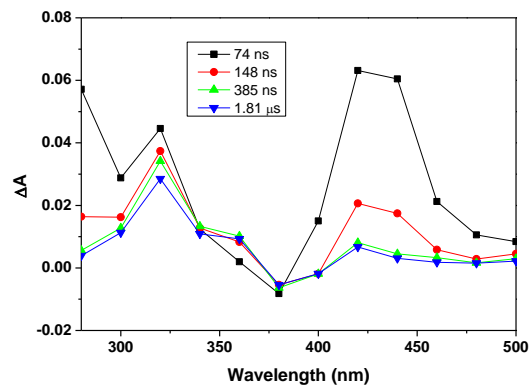

Decay lifetime observed at 420 nm: 50 ns

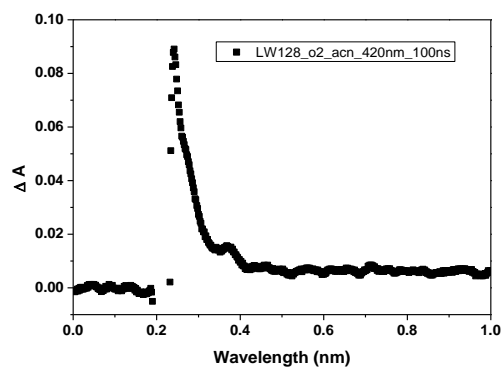

(i) Decay transient of 11 vs 15 in  $\text{CH}_3\text{CN}$

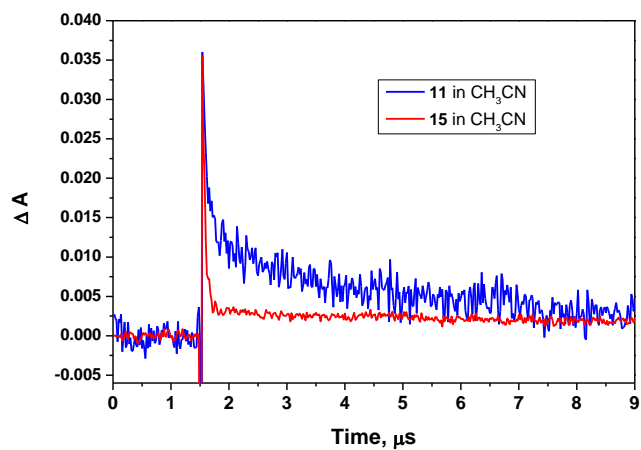



## 7. Computational data of 10

### Structure optimization at B3LYP/6-311 level of theory for S10-1

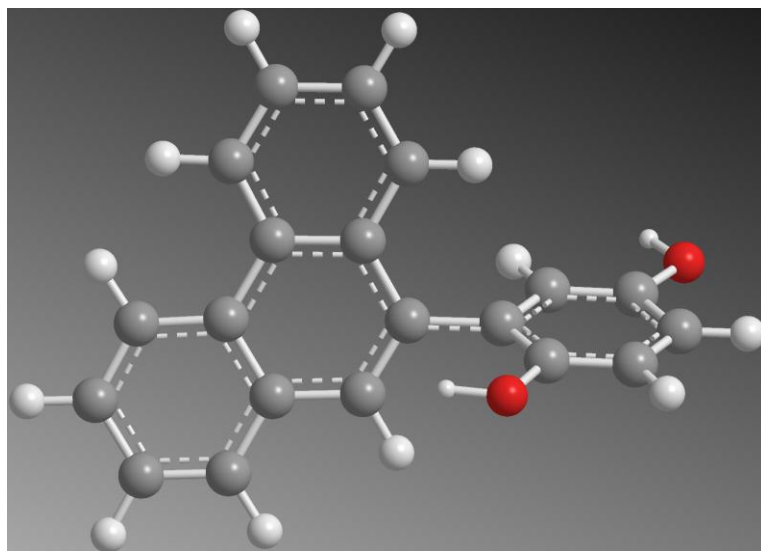

**Table 1. Atomic Coordinates for S10-1**

| Center Number | Atomic Number | Atomic Type | Coordinates (Angstroms) |           |           |
|---------------|---------------|-------------|-------------------------|-----------|-----------|
|               |               |             | X                       | Y         | Z         |
| 1             | 6             | 0           | -4.770988               | -1.172071 | -0.433577 |
| 2             | 6             | 0           | -4.037972               | -0.011794 | -0.253552 |
| 3             | 6             | 0           | -2.625110               | -0.040037 | -0.152415 |
| 4             | 6             | 0           | -1.974754               | -1.306044 | -0.243826 |
| 5             | 6             | 0           | -2.745439               | -2.480632 | -0.428070 |
| 6             | 6             | 0           | -4.122335               | -2.419816 | -0.521412 |
| 7             | 6             | 0           | -1.812731               | 1.155386  | 0.046545  |
| 8             | 6             | 0           | -0.388170               | 1.040422  | 0.132670  |
| 9             | 6             | 0           | 0.239578                | -0.263905 | 0.000362  |
| 10            | 6             | 0           | -0.544813               | -1.374697 | -0.164929 |
| 11            | 6             | 0           | -2.387049               | 2.444414  | 0.173227  |
| 12            | 6             | 0           | -1.608977               | 3.567854  | 0.386976  |
| 13            | 6             | 0           | -0.210938               | 3.448461  | 0.490680  |
| 14            | 6             | 0           | 0.383665                | 2.206940  | 0.366085  |
| 15            | 6             | 0           | 1.727822                | -0.413113 | 0.040922  |
| 16            | 6             | 0           | 2.351941                | -1.052320 | 1.123878  |
| 17            | 6             | 0           | 3.740968                | -1.207558 | 1.155463  |
| 18            | 6             | 0           | 4.524456                | -0.734681 | 0.109884  |
| 19            | 6             | 0           | 3.915433                | -0.100444 | -0.976855 |
| 20            | 6             | 0           | 2.533042                | 0.061608  | -1.010747 |
| 21            | 8             | 0           | 1.640755                | -1.559173 | 2.214068  |
| 22            | 8             | 0           | 4.758913                | 0.347010  | -2.000749 |
| 23            | 1             | 0           | -5.849016               | -1.119664 | -0.507232 |
| 24            | 1             | 0           | -4.565486               | 0.928383  | -0.190464 |
| 25            | 1             | 0           | -2.233581               | -3.432353 | -0.497075 |

|    |   |   |           |           |           |
|----|---|---|-----------|-----------|-----------|
| 26 | 1 | 0 | -4.701117 | -3.322626 | -0.661978 |
| 27 | 1 | 0 | -0.075277 | -2.345058 | -0.273219 |
| 28 | 1 | 0 | -3.458563 | 2.561894  | 0.108936  |
| 29 | 1 | 0 | -2.078208 | 4.538019  | 0.481558  |
| 30 | 1 | 0 | 0.396635  | 4.324764  | 0.672283  |
| 31 | 1 | 0 | 1.455608  | 2.111553  | 0.454228  |
| 32 | 1 | 0 | 4.182980  | -1.701898 | 2.007972  |
| 33 | 1 | 0 | 5.598410  | -0.847693 | 0.114631  |
| 34 | 1 | 0 | 2.059277  | 0.548481  | -1.854779 |
| 35 | 1 | 0 | 0.685775  | -1.393868 | 2.115510  |
| 36 | 1 | 0 | 4.259430  | 0.759534  | -2.724784 |

---

### Structure optimization at B3LYP/6-311 level of theory for S10-2

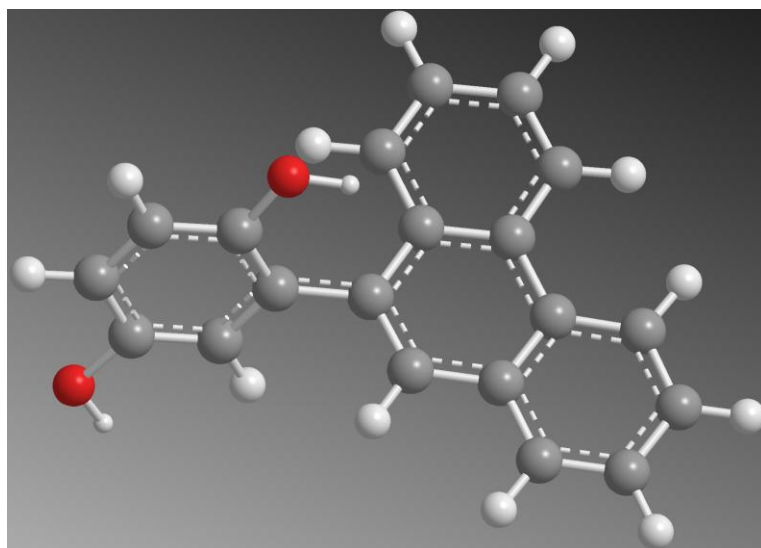

**Table 2. Atomic Coordinates for S10-2**

| Center Number | Atomic Number | Atomic Type | Coordinates (Angstroms) |           |           |
|---------------|---------------|-------------|-------------------------|-----------|-----------|
|               |               |             | X                       | Y         | Z         |
| 1             | 6             | 0           | 4.695051                | -1.501712 | 0.047603  |
| 2             | 6             | 0           | 4.034272                | -0.295550 | -0.107775 |
| 3             | 6             | 0           | 2.619906                | -0.219379 | -0.070497 |
| 4             | 6             | 0           | 1.890790                | -1.427955 | 0.135235  |
| 5             | 6             | 0           | 2.589047                | -2.650990 | 0.292740  |
| 6             | 6             | 0           | 3.969009                | -2.692494 | 0.249510  |
| 7             | 6             | 0           | 1.881344                | 1.027514  | -0.234803 |
| 8             | 6             | 0           | 0.450031                | 1.017067  | -0.182004 |
| 9             | 6             | 0           | -0.255788               | -0.233447 | 0.051652  |
| 10            | 6             | 0           | 0.459382                | -1.391290 | 0.192937  |
| 11            | 6             | 0           | 2.531619                | 2.265786  | -0.461372 |
| 12            | 6             | 0           | 1.819451                | 3.438691  | -0.635325 |
| 13            | 6             | 0           | 0.412965                | 3.422690  | -0.596974 |

|    |   |   |           |           |           |
|----|---|---|-----------|-----------|-----------|
| 14 | 6 | 0 | -0.254877 | 2.233339  | -0.375335 |
| 15 | 6 | 0 | -1.749545 | -0.276019 | 0.125914  |
| 16 | 6 | 0 | -2.444754 | 0.290722  | 1.206708  |
| 17 | 6 | 0 | -3.837698 | 0.209296  | 1.279562  |
| 18 | 6 | 0 | -4.558095 | -0.437301 | 0.281768  |
| 19 | 6 | 0 | -3.879672 | -1.009150 | -0.797338 |
| 20 | 6 | 0 | -2.491004 | -0.931278 | -0.874059 |
| 21 | 8 | 0 | -1.804992 | 0.953188  | 2.257317  |
| 22 | 8 | 0 | -4.659920 | -1.645394 | -1.769964 |
| 23 | 1 | 0 | 5.776000  | -1.529653 | 0.014597  |
| 24 | 1 | 0 | 4.619463  | 0.599189  | -0.259937 |
| 25 | 1 | 0 | 2.018750  | -3.557927 | 0.450116  |
| 26 | 1 | 0 | 4.491897  | -3.631486 | 0.371120  |
| 27 | 1 | 0 | -0.067423 | -2.320509 | 0.370983  |
| 28 | 1 | 0 | 3.609921  | 2.303559  | -0.504271 |
| 29 | 1 | 0 | 2.345769  | 4.368170  | -0.806512 |
| 30 | 1 | 0 | -0.144667 | 4.337778  | -0.743282 |
| 31 | 1 | 0 | -1.334707 | 2.217510  | -0.359081 |
| 32 | 1 | 0 | -4.333367 | 0.653276  | 2.130358  |
| 33 | 1 | 0 | -5.634831 | -0.509723 | 0.321072  |
| 34 | 1 | 0 | -1.962523 | -1.365928 | -1.713987 |
| 35 | 1 | 0 | -0.838119 | 0.950014  | 2.149429  |
| 36 | 1 | 0 | -4.115459 | -2.007857 | -2.488305 |

---
